# Supplementary material for: Development of Novel Class of Phenylpyrazolo[3,4-d]pyrimidine-Based Analogs with Potent Anticancer Activity and Multitarget Enzyme Inhibition Supported by Docking Studies
Source: MDPI journal article supplement (doi:10.3390/ijms241915026), 2023-10-09

## Supporting information

### **Development of novel class of phenylpyrazolo[3,4-*d*]pyrimidine based analogs with potent anticancer activity and multitarget enzyme inhibition supported by docking studies**

#### CONTENTS:

|                                                    |   |
|----------------------------------------------------|---|
| Spectroscopic data of target compounds in MS ..... | 1 |
|----------------------------------------------------|---|

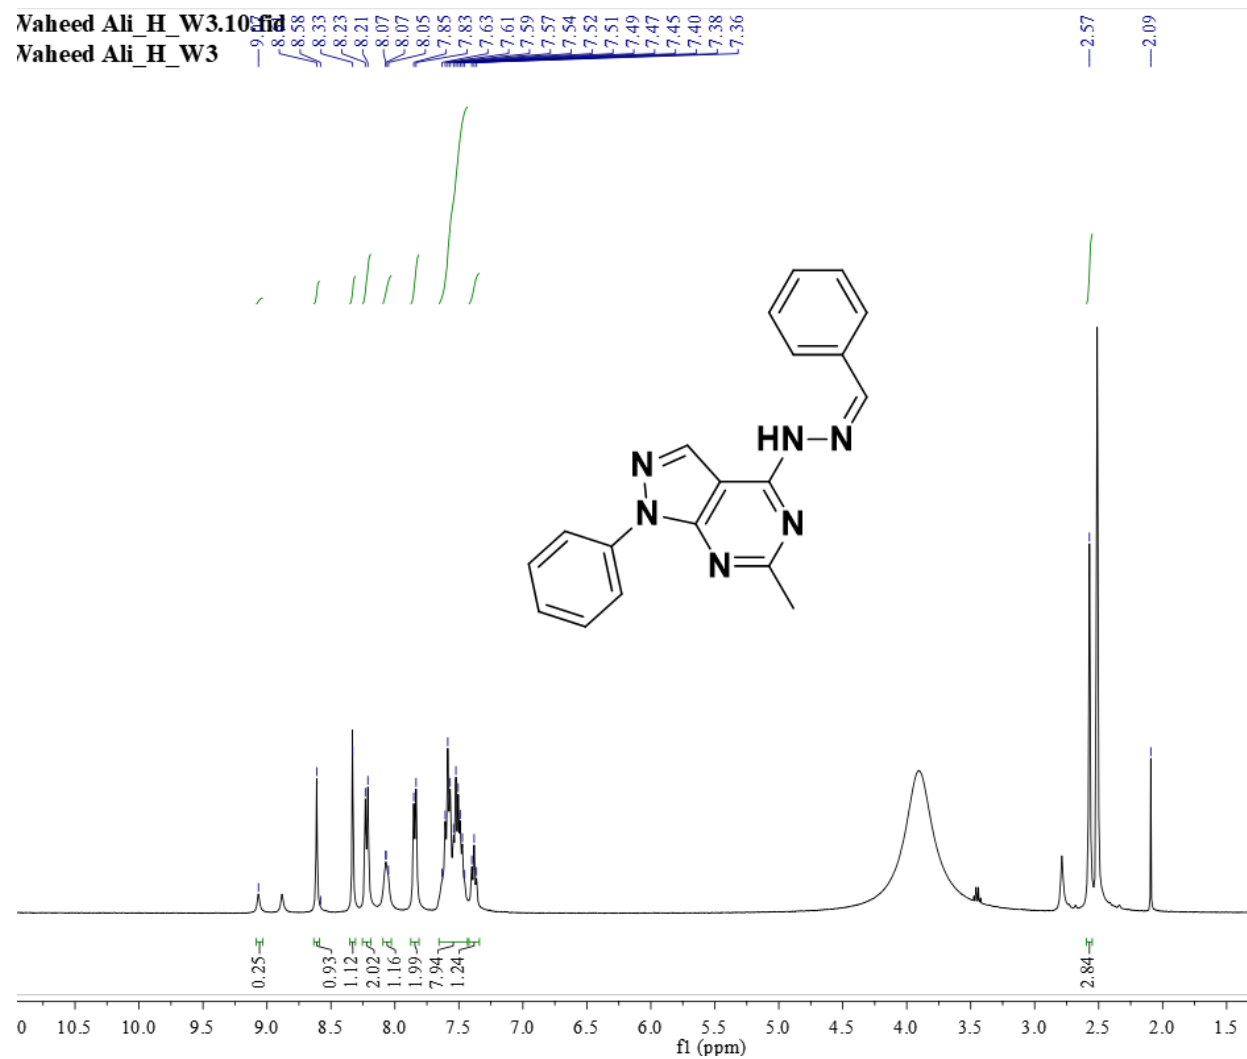

<sup>1</sup>H NMR of Compound 5a

Waheed Ali\_C\_W3--.10.fid  
Waheed Ali\_C\_W3

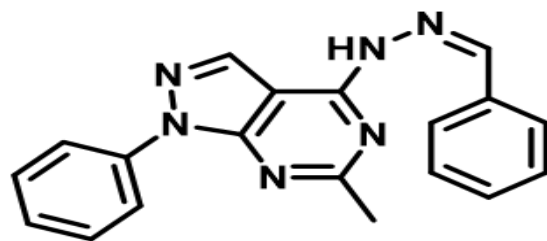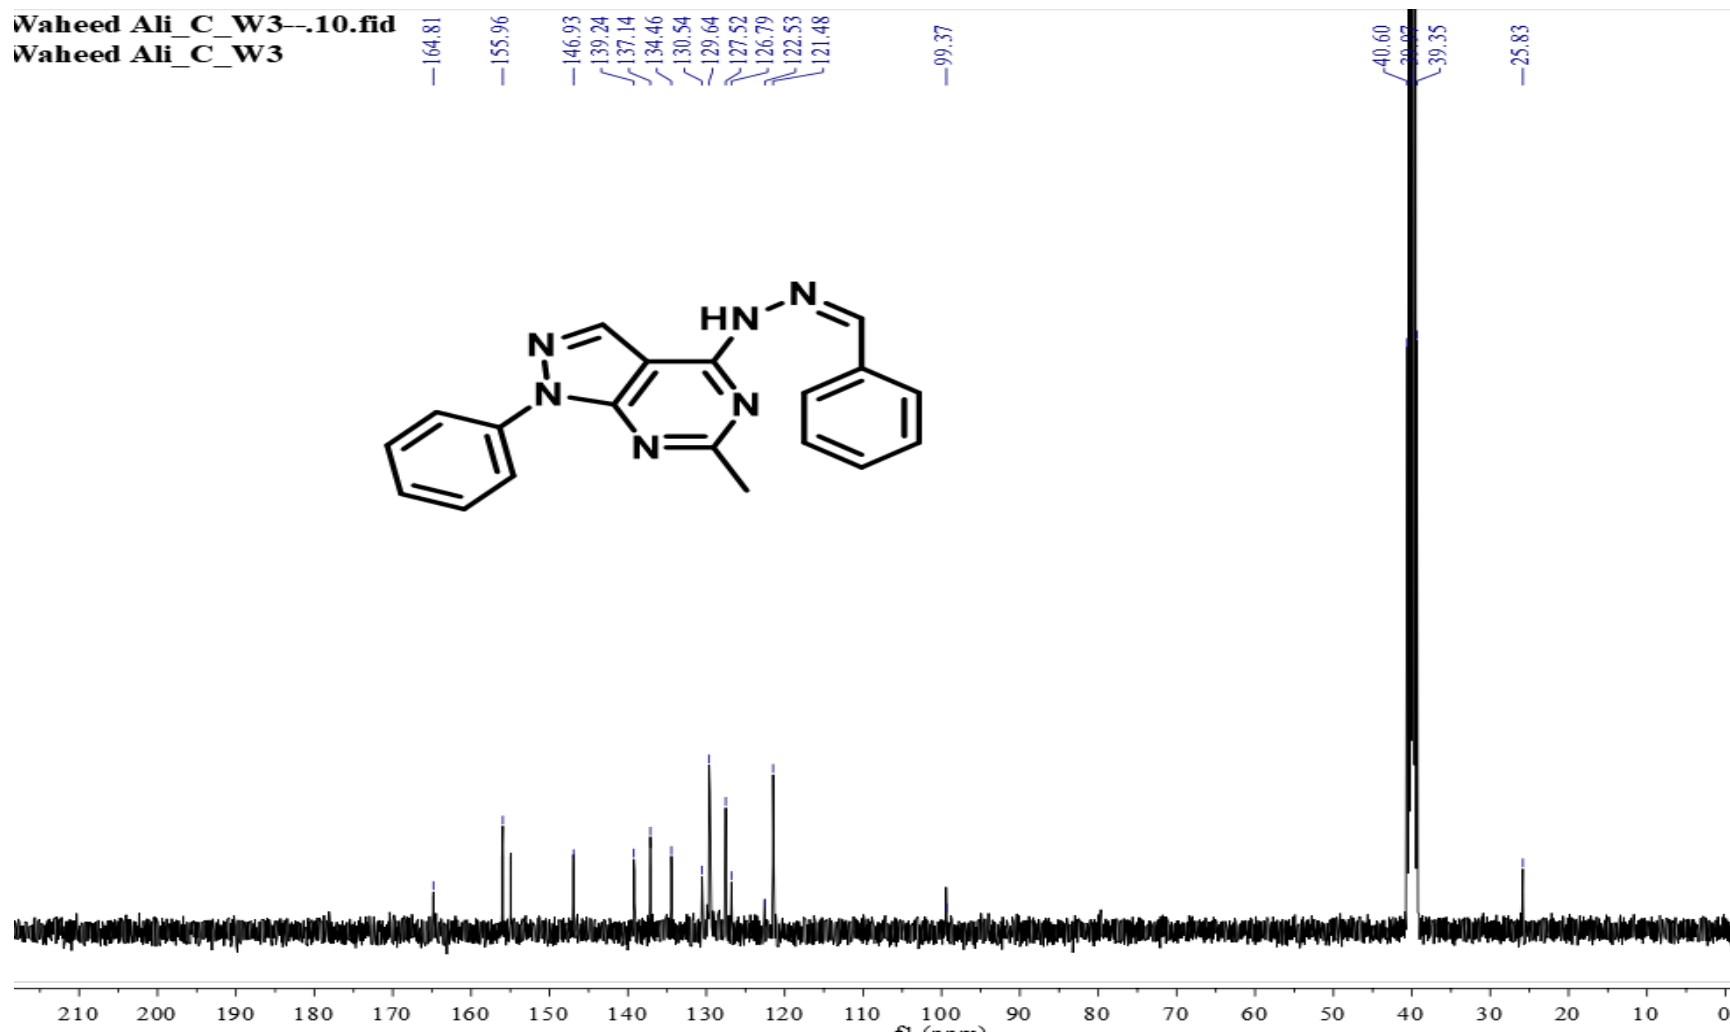

$^{13}\text{C}$  NMR of Compound 5a

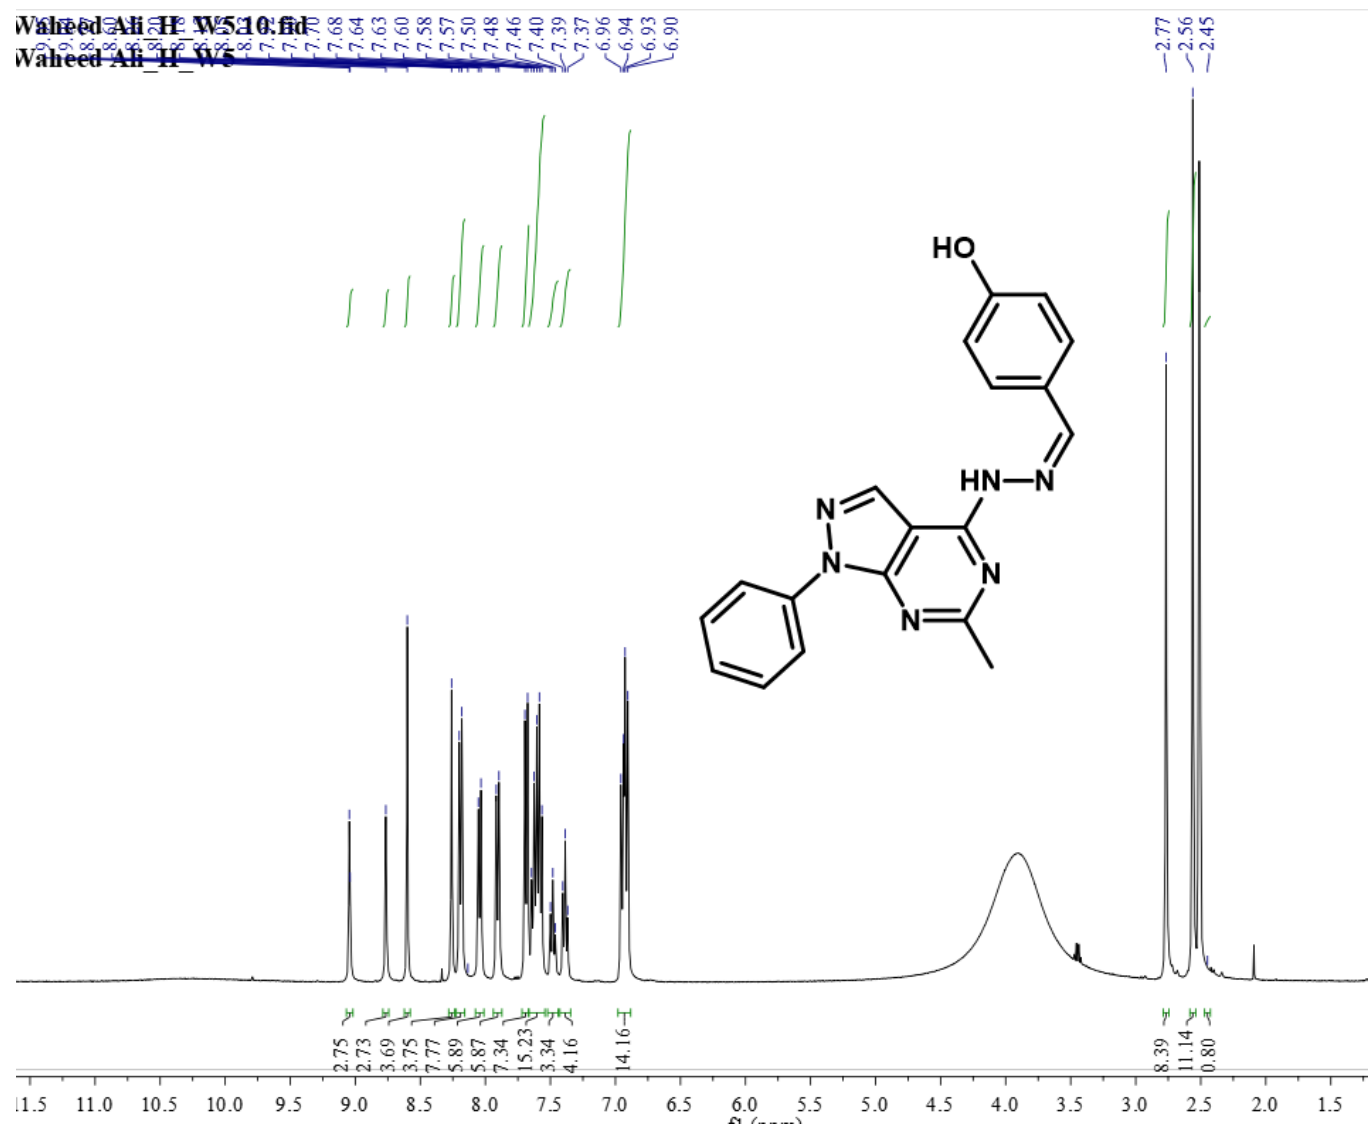

**<sup>1</sup>H NMR of Compound 5b**

Waheed Ali\_C\_W5-10.fid

Waheed Ali\_C\_W5

163.36  
161.28  
160.28  
158.39  
154.41  
154.05  
153.36  
151.01  
148.82  
146.64  
138.89  
137.81  
136.83  
131.24  
129.86  
128.31  
127.11  
125.09  
123.98  
122.56  
121.76  
116.29  
99.22  
98.53

40.27  
39.64  
39.23

25.05  
23.06

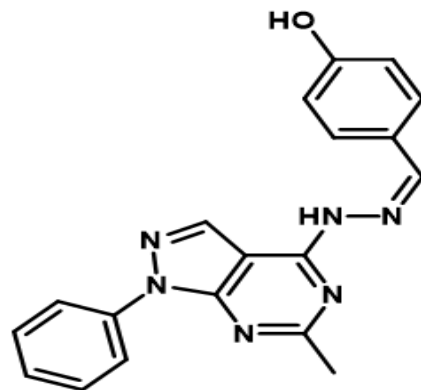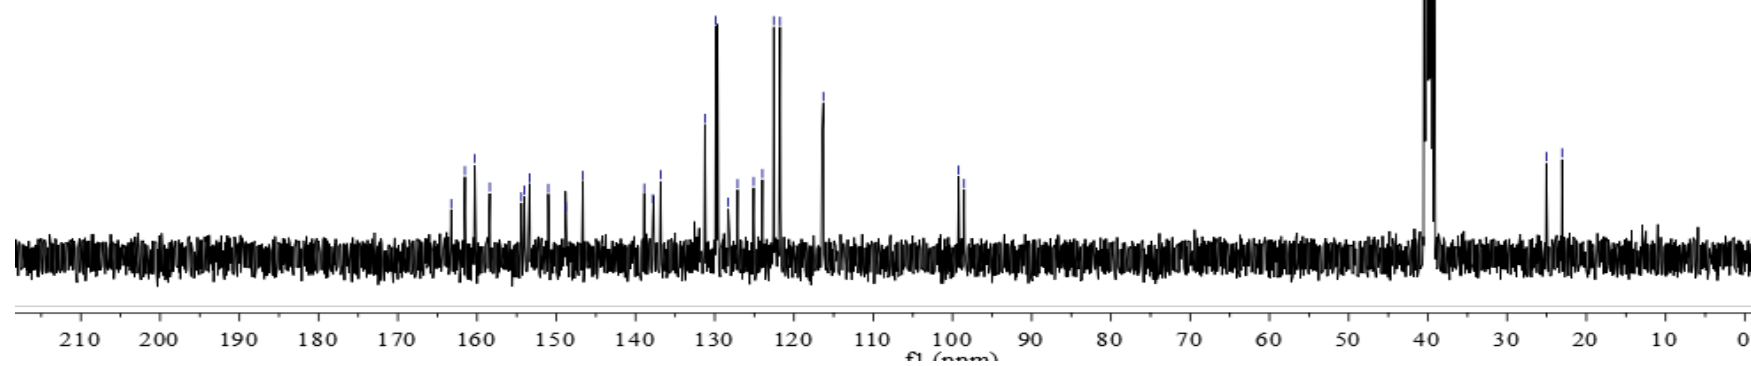

$^{13}\text{C}$  NMR of Compound 5b

## SAMPLE INFORMATION

|                   |                            |                     |                                          |
|-------------------|----------------------------|---------------------|------------------------------------------|
| Sample Name:      | W5                         | Acquired By:        | System                                   |
| Sample Type:      | Unknown                    | Sample Set Name:    | errere                                   |
| Vial:             | 21                         | Acq. Method Set:    | FTANInstrument                           |
| Injection #:      | 1                          | Processing Method:  | Default                                  |
| Injection Volume: | 10.00 uL                   | Channel Name:       | 215.0nm                                  |
| Run Time:         | 26.0 Minutes               | Proc. Chnl. Descr.: | 996 FDA.215.0nm(FDA.210.0 to 800.0 nm)at |
|                   |                            |                     |                                          |
| Date Acquired:    | 9/24/2023 2:01:03 AM/EEST  |                     |                                          |
| Date Processed:   | 9/24/2023 10:20:39 AM/EEST |                     |                                          |

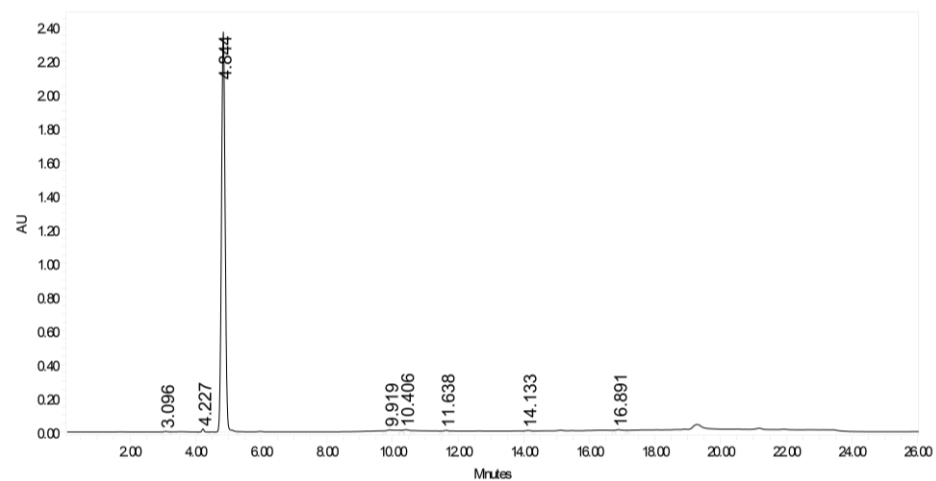

|   | RT     | Area     | %Area | Height  |
|---|--------|----------|-------|---------|
| 1 | 3.096  | 13236    | 0.07  | 2894    |
| 2 | 4.227  | 77241    | 0.42  | 18030   |
| 3 | 4.844  | 18186264 | 98.23 | 2369496 |
| 4 | 9.919  | 93614    | 0.51  | 5337    |
| 5 | 10.406 | 56579    | 0.31  | 5740    |
| 6 | 11.638 | 27840    | 0.15  | 4057    |
| 7 | 14.133 | 25287    | 0.14  | 3333    |
| 8 | 16.891 | 33035    | 0.18  | 3899    |

## HPLC of Compound 5b

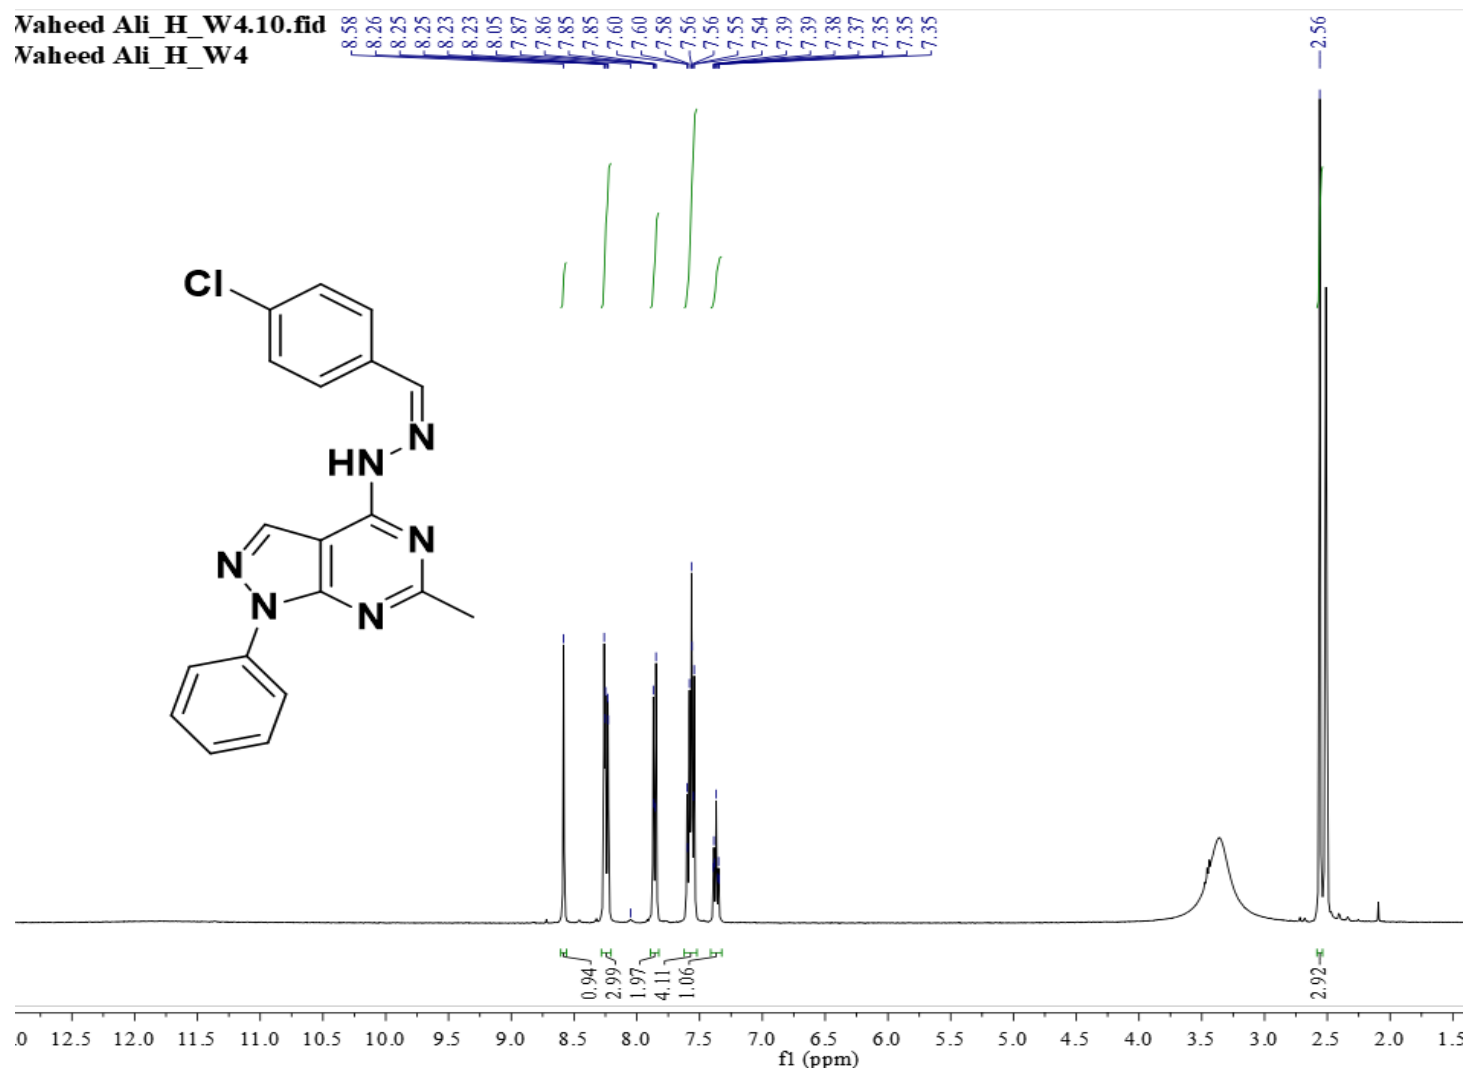

$^1\text{H}$  NMR of Compound 5c

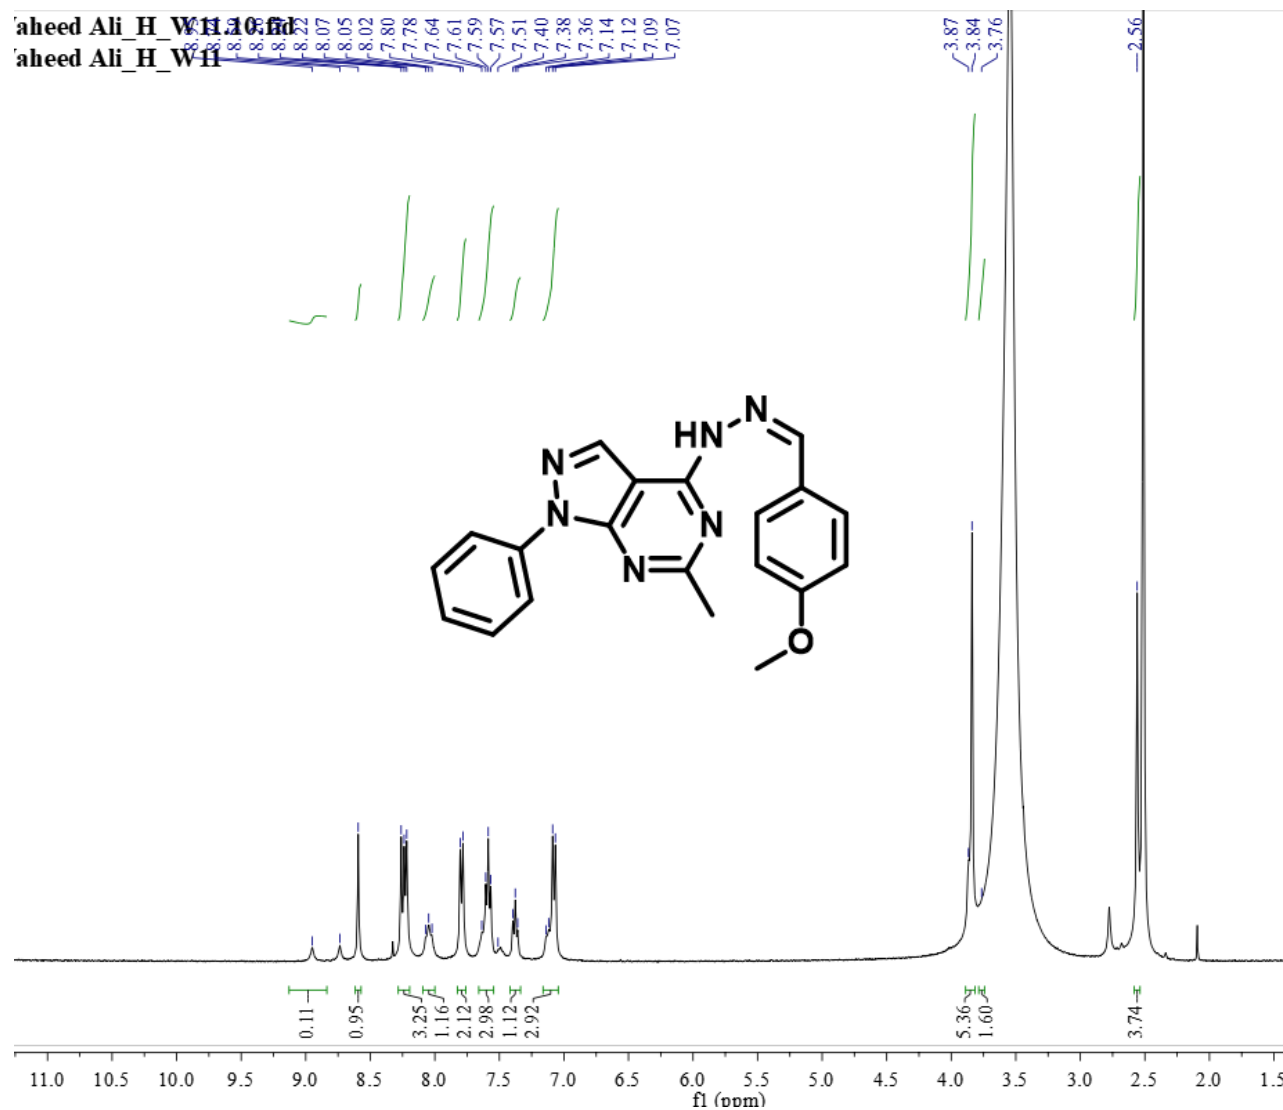

**<sup>1</sup>H NMR of Compound 5d**



Vaheed Ali\_C\_W11-.10.fid  
Vaheed Ali\_C\_W11

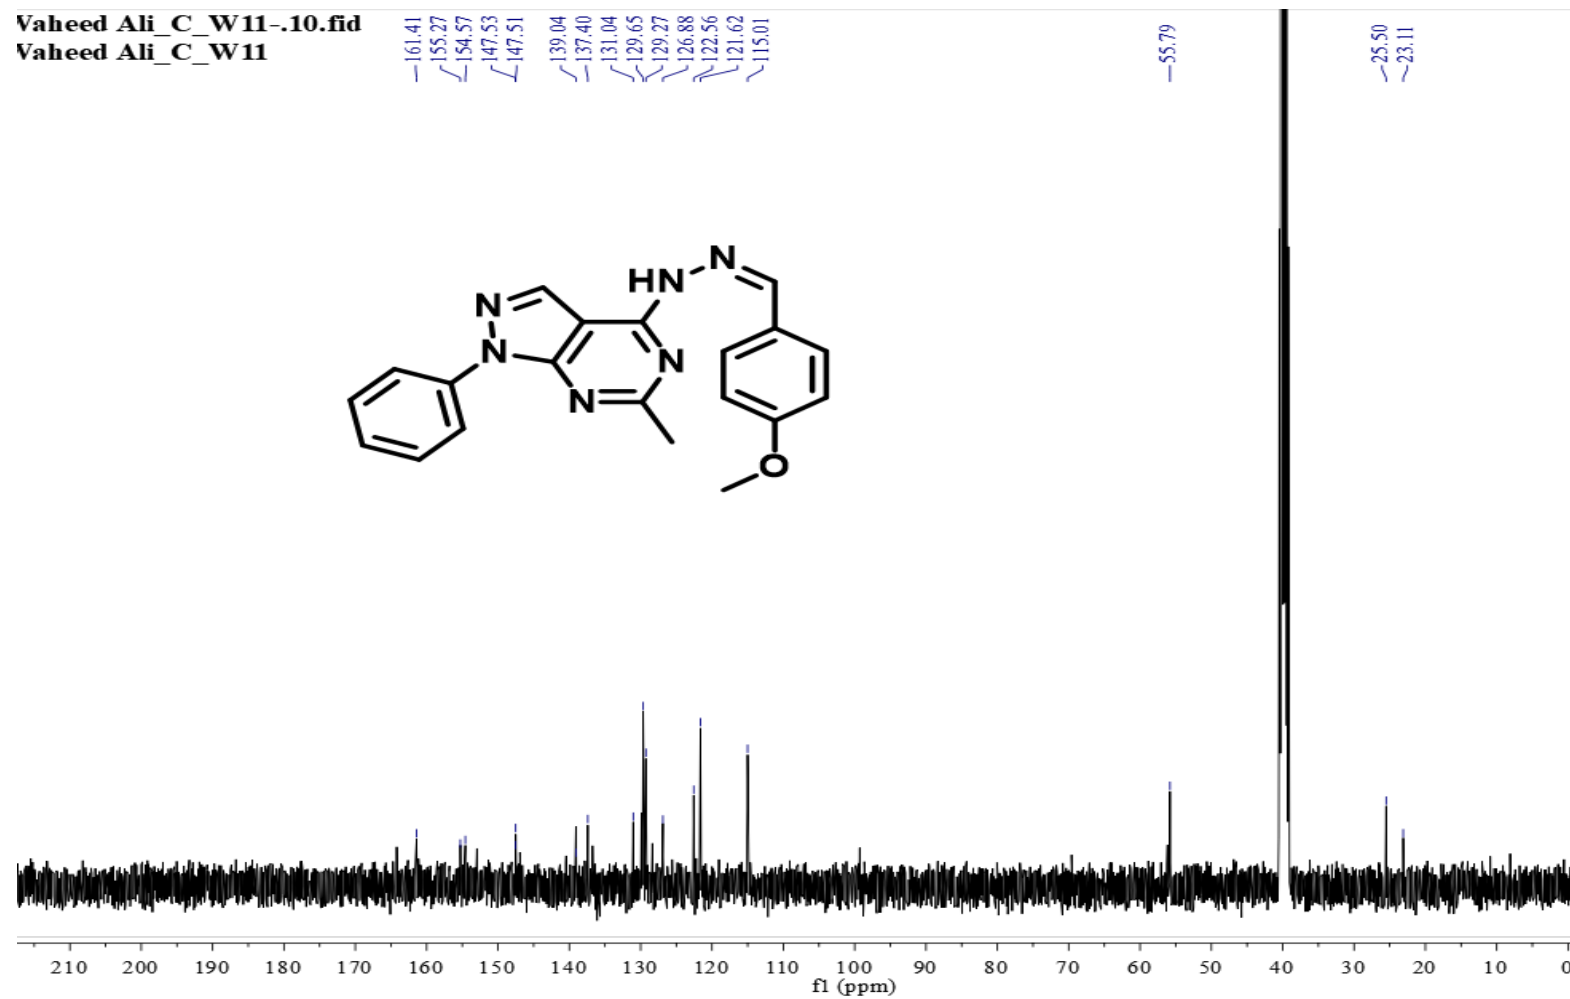

$^{13}\text{C}$  NMR of Compound 5d

wahed-ali-w11 #129-133 RT: 2.18-2.24 AV: 5 SB: 2 4.45 , 4.45 NL: 2.47E4  
T: {0,0} + c EI Full ms [40.00-1000.00]

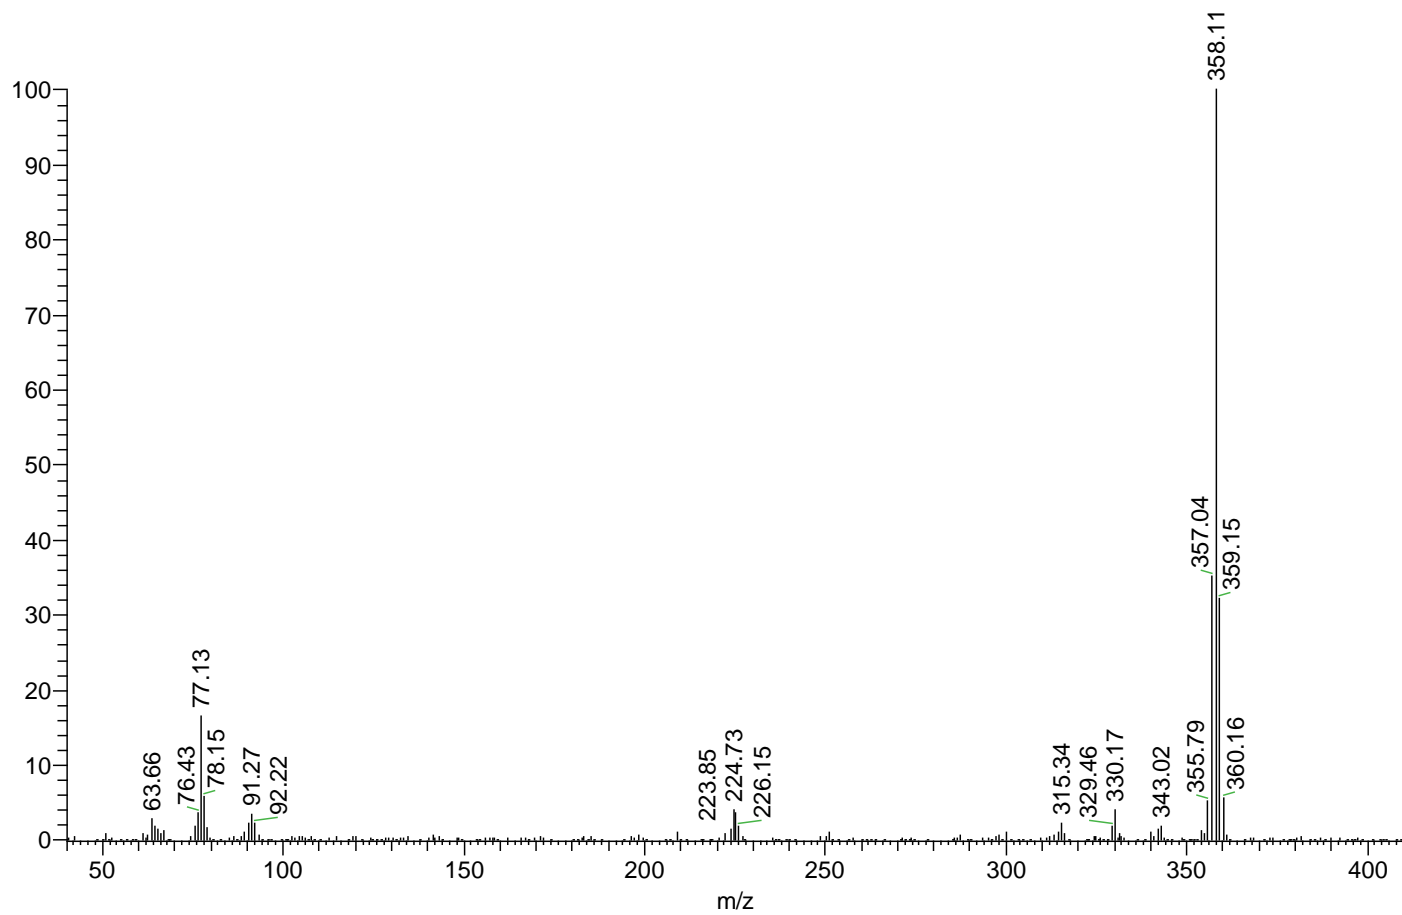

Mass of Compound 5d

Waheed Ali\_H\_W10#.10.fid

Waheed Ali\_H\_W10#

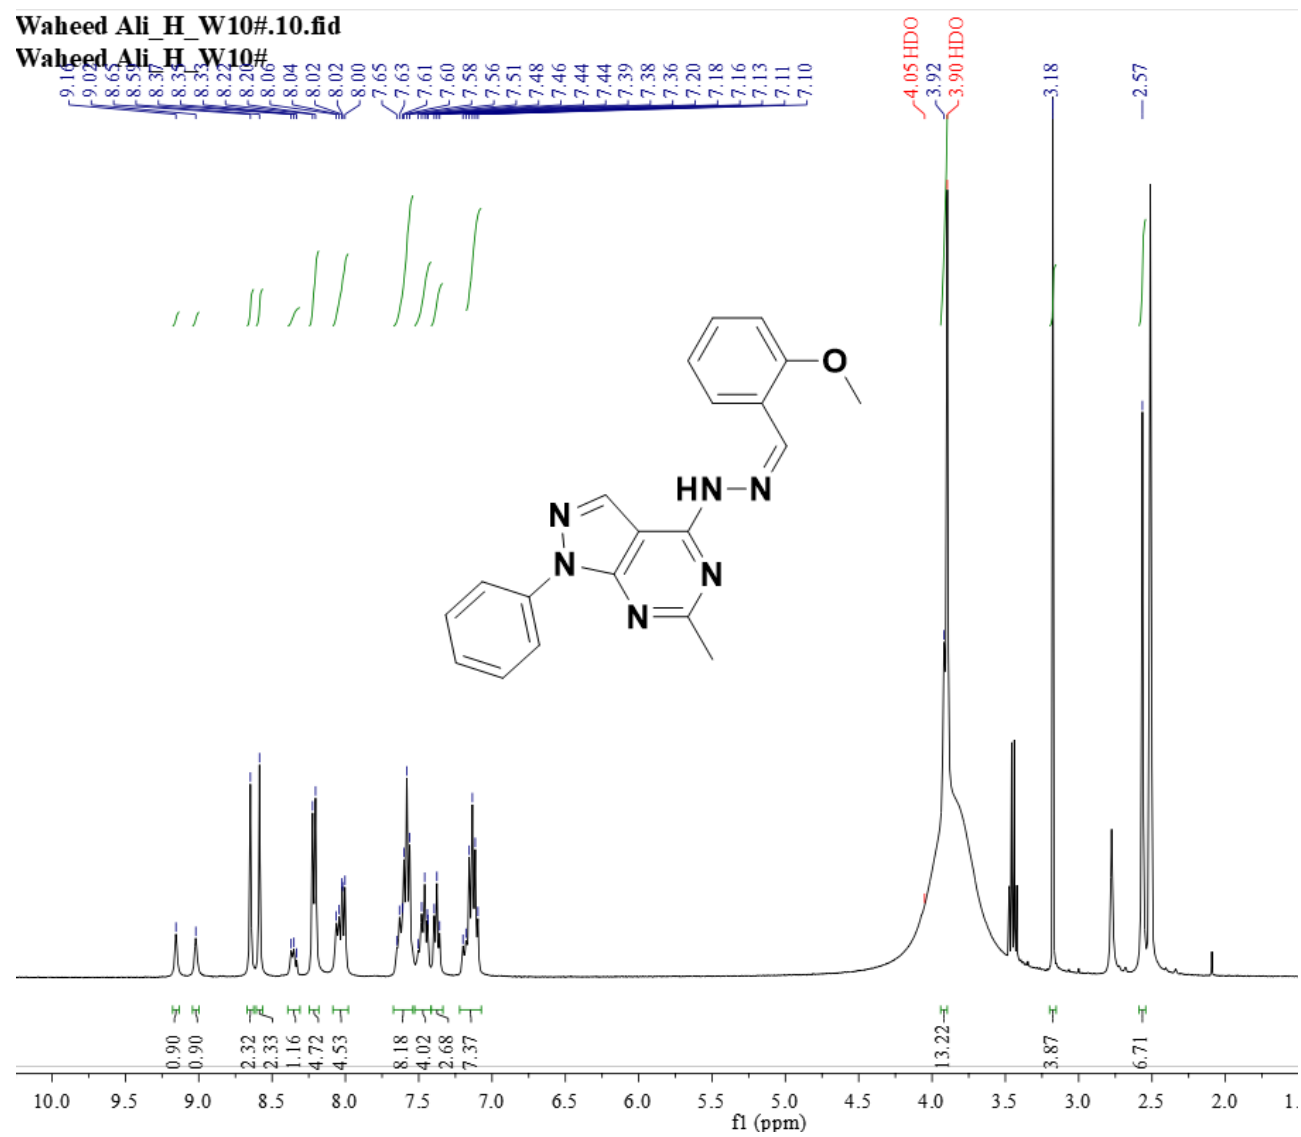

$^1\text{H}$  NMR of Compound 5e

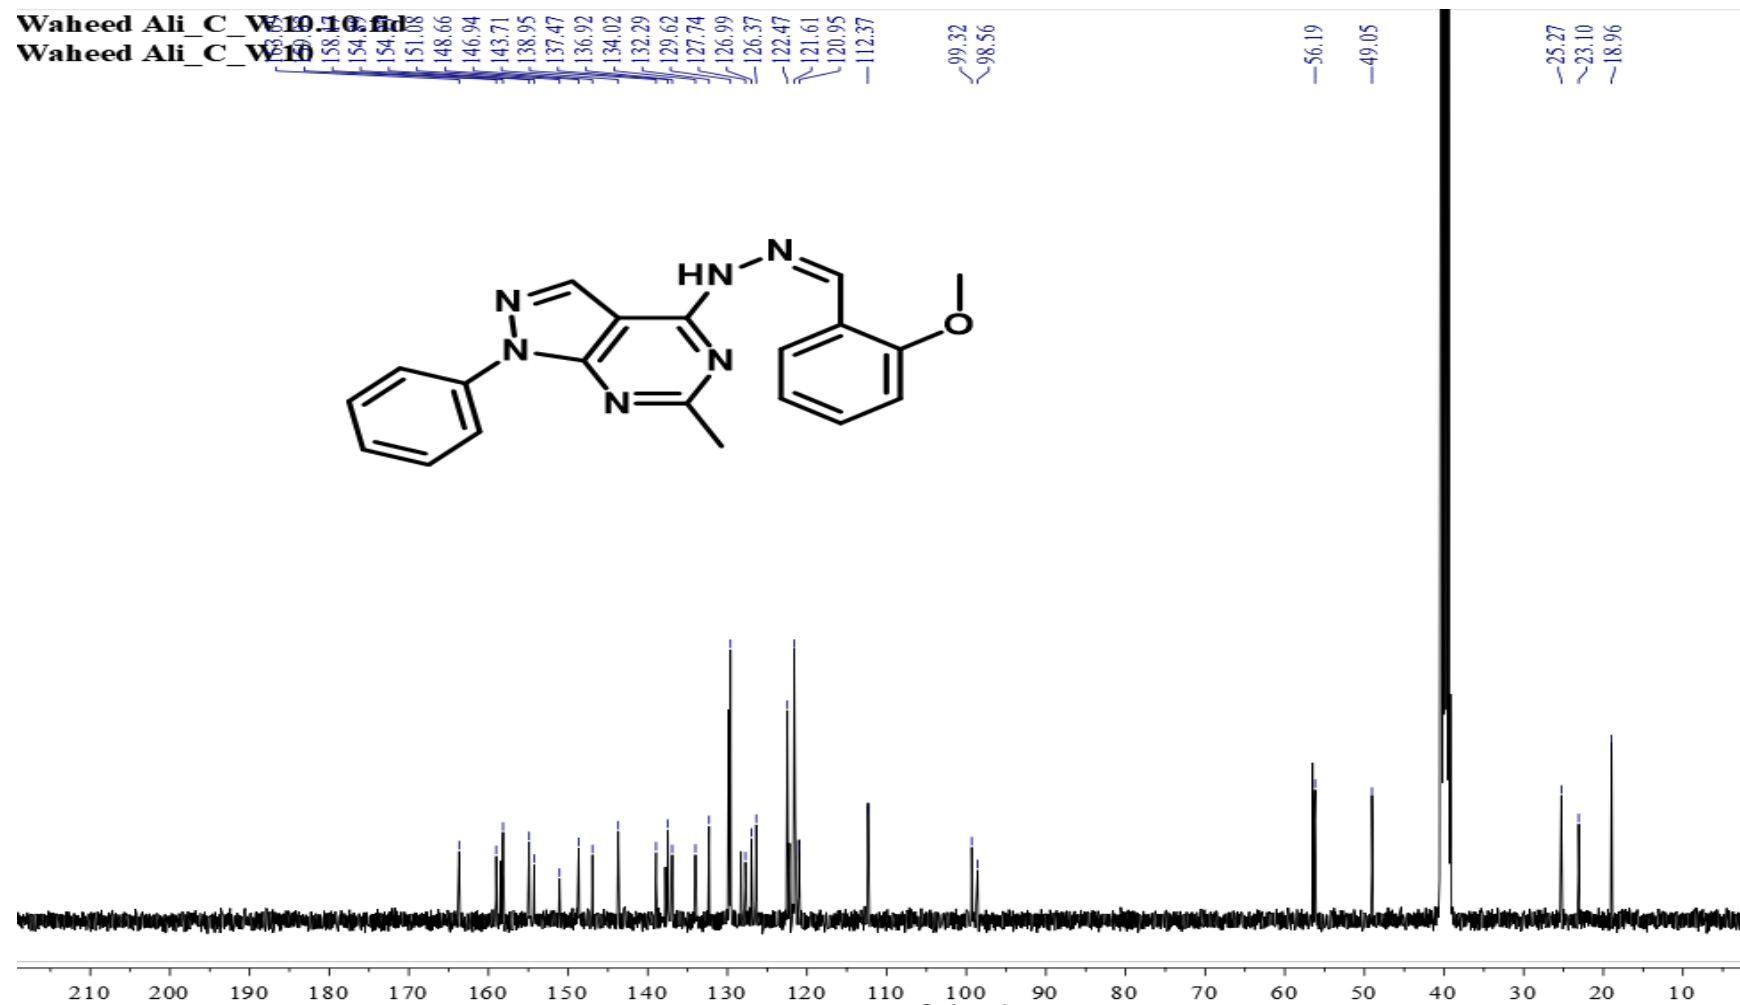

$^{13}\text{C}$  NMR of Compound 5e

wahed-ali-w10 #130 RT: 2.19 AV: 1 SB: 2 4.45 , 4.45 NL: 6.07E4  
T: {0,0} + c EI Full ms [40.00-1000.00]

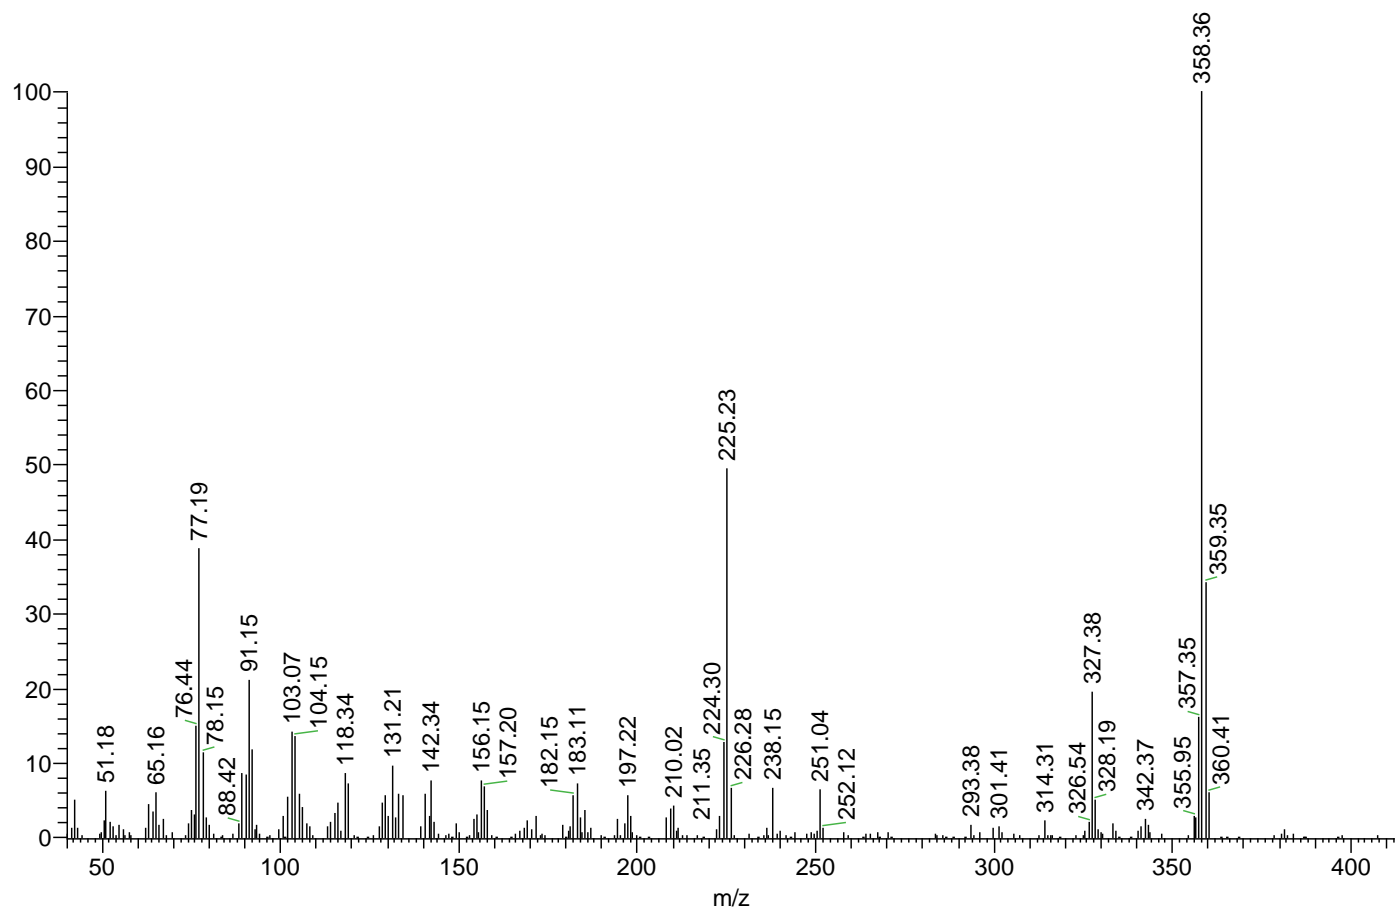

Mass of Compound 5e

Waheed Ali\_H\_W14

Microanalytical Unit - FOPCU - NMR laboratory  
www.pharma.cu.edu.eg dir-mau.fopcu@pharma.cu.edu.eg

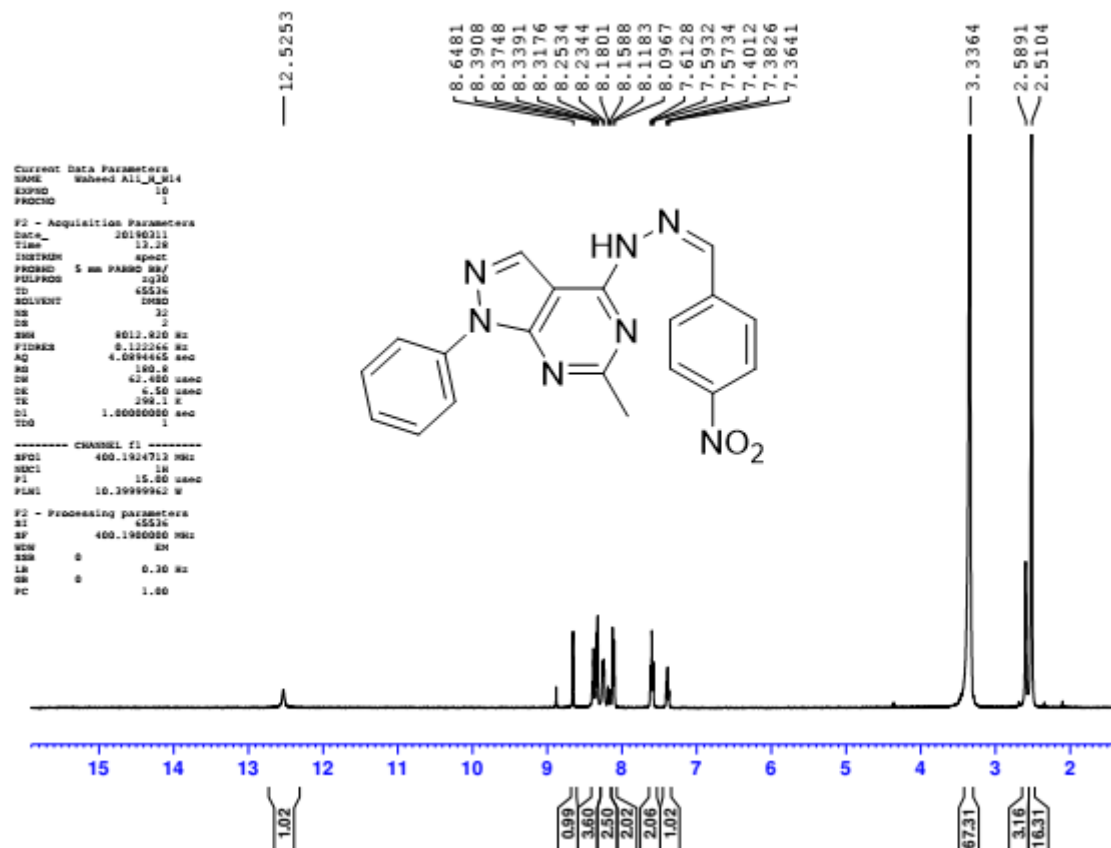

<sup>1</sup>H NMR of Compound 5f

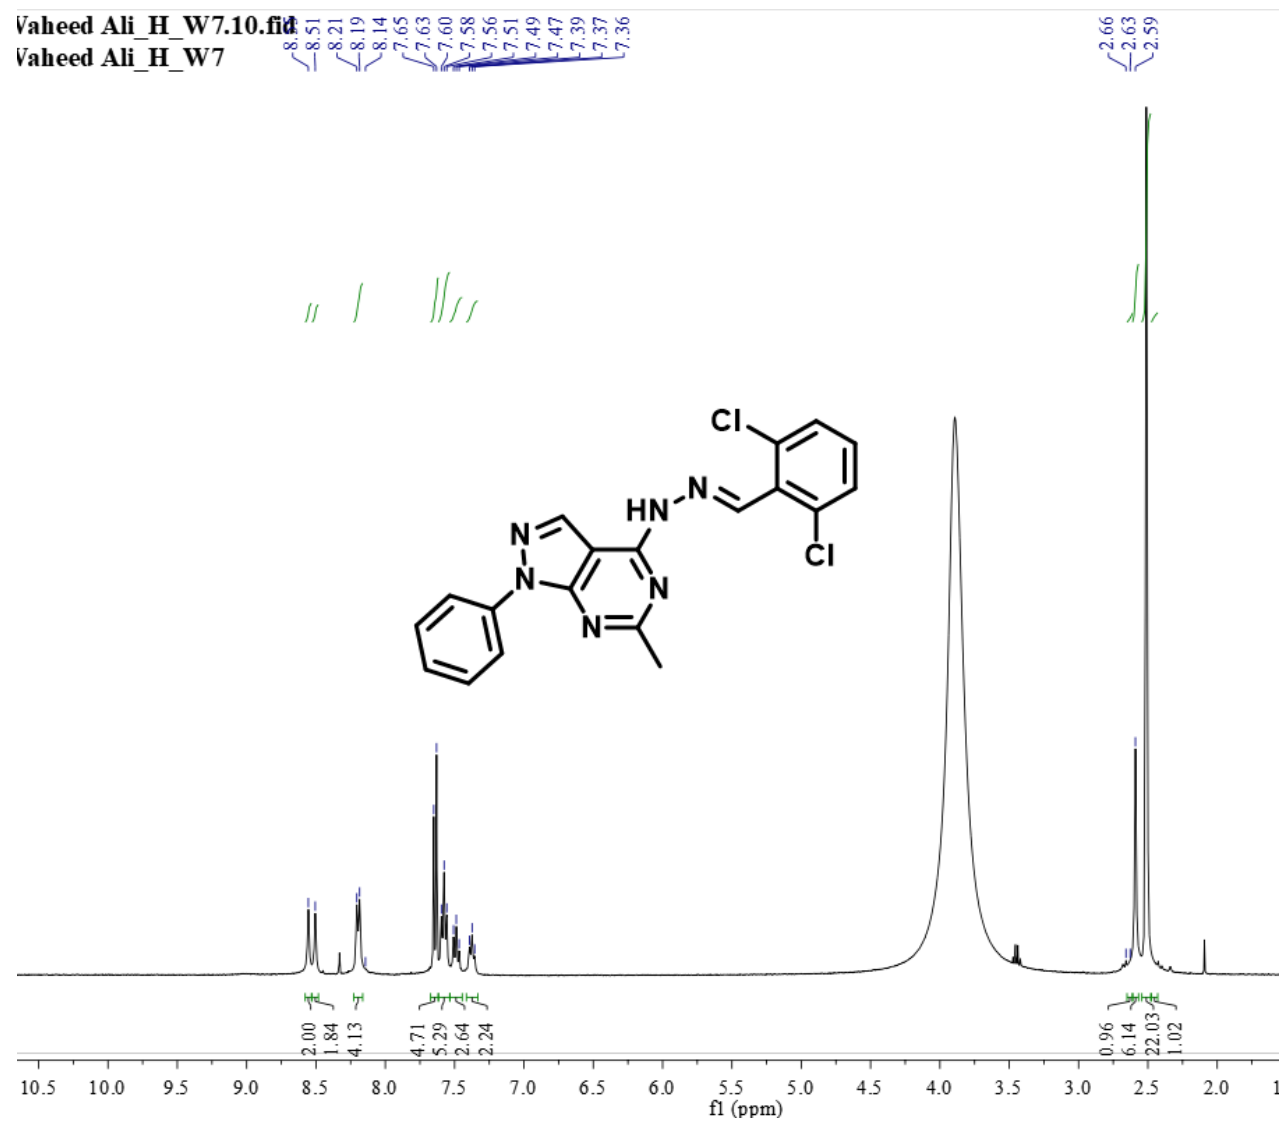

<sup>1</sup>H NMR of Compound 5g

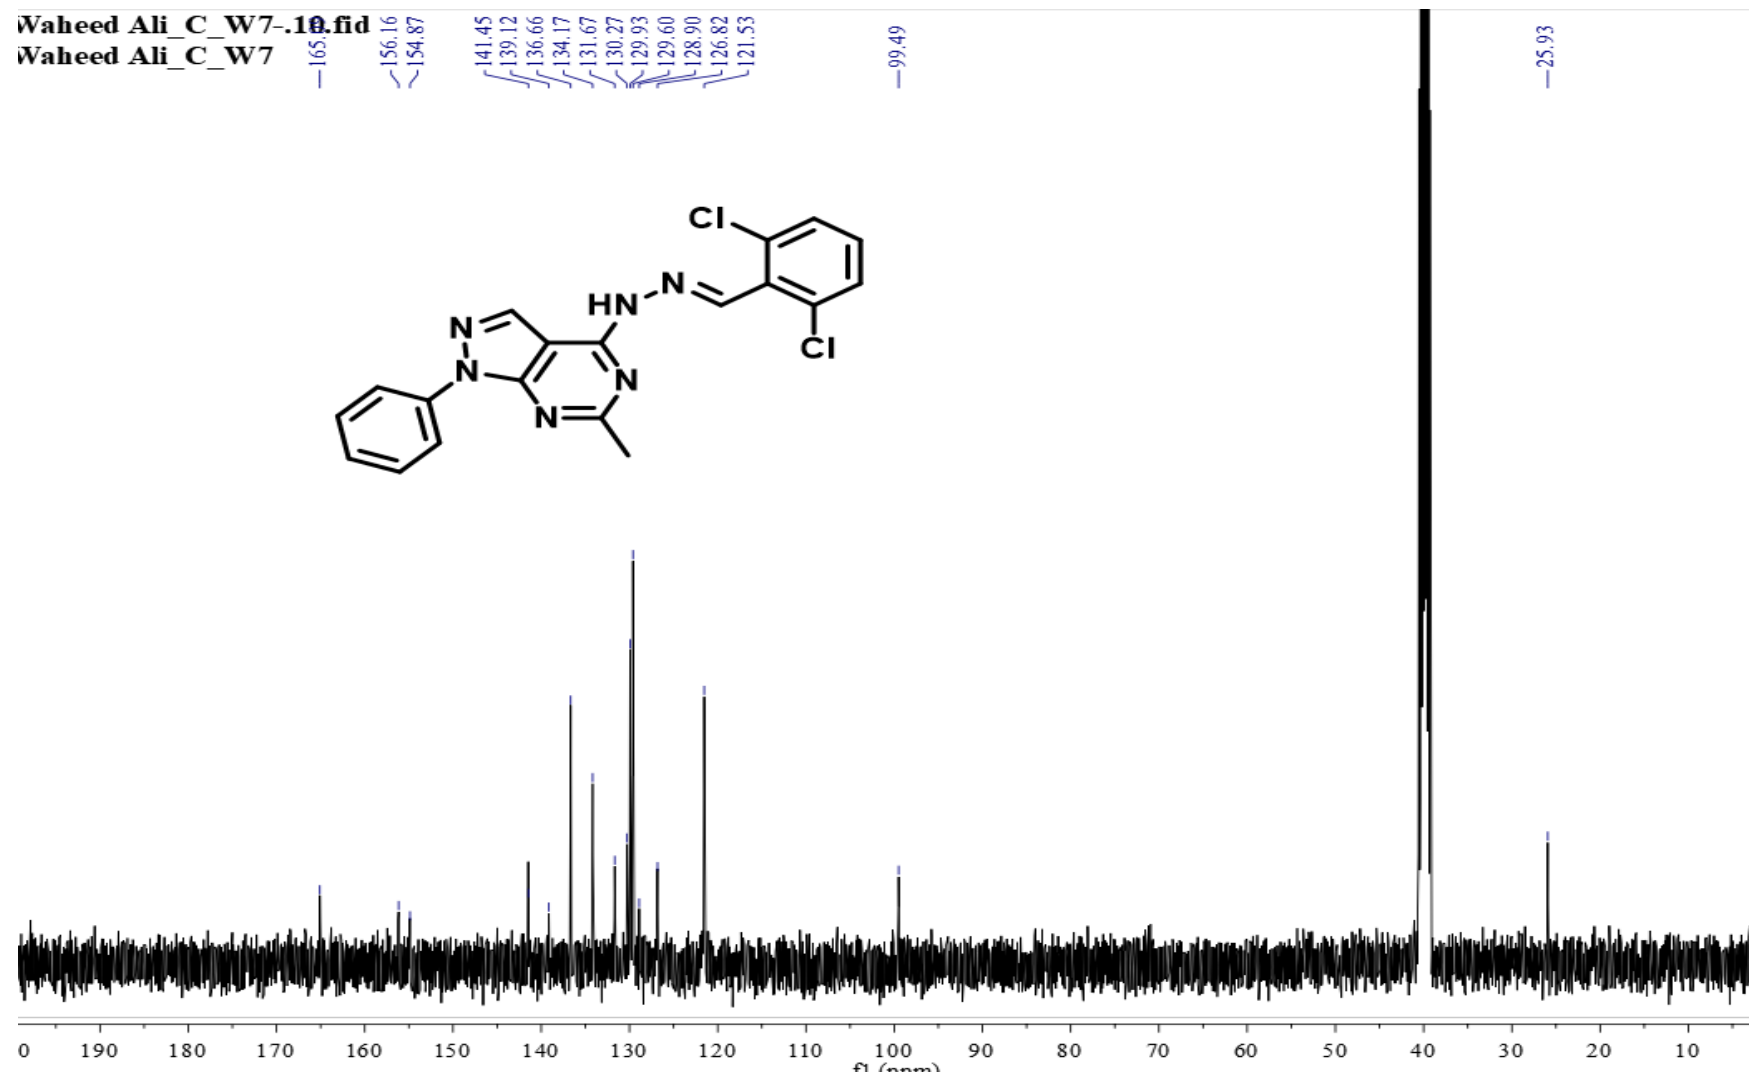

$^{13}\text{C}$  NMR of Compound 5g



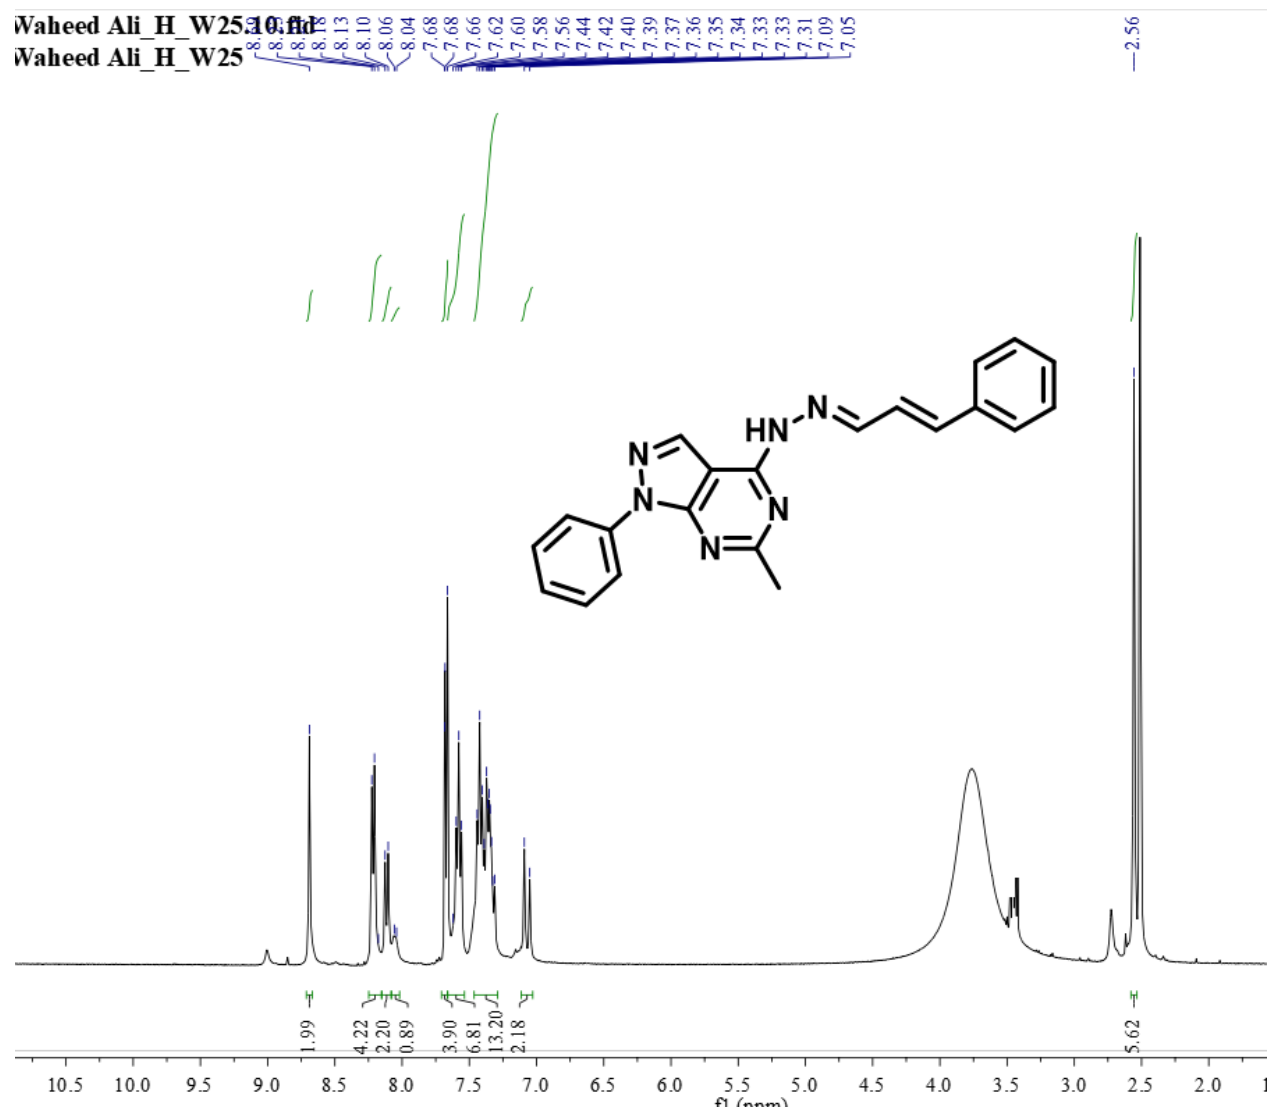

<sup>1</sup>H NMR of Compound 5h

\\aheed Ali\_C\_W25-.10.fid

\\aheed Ali\_C\_W25

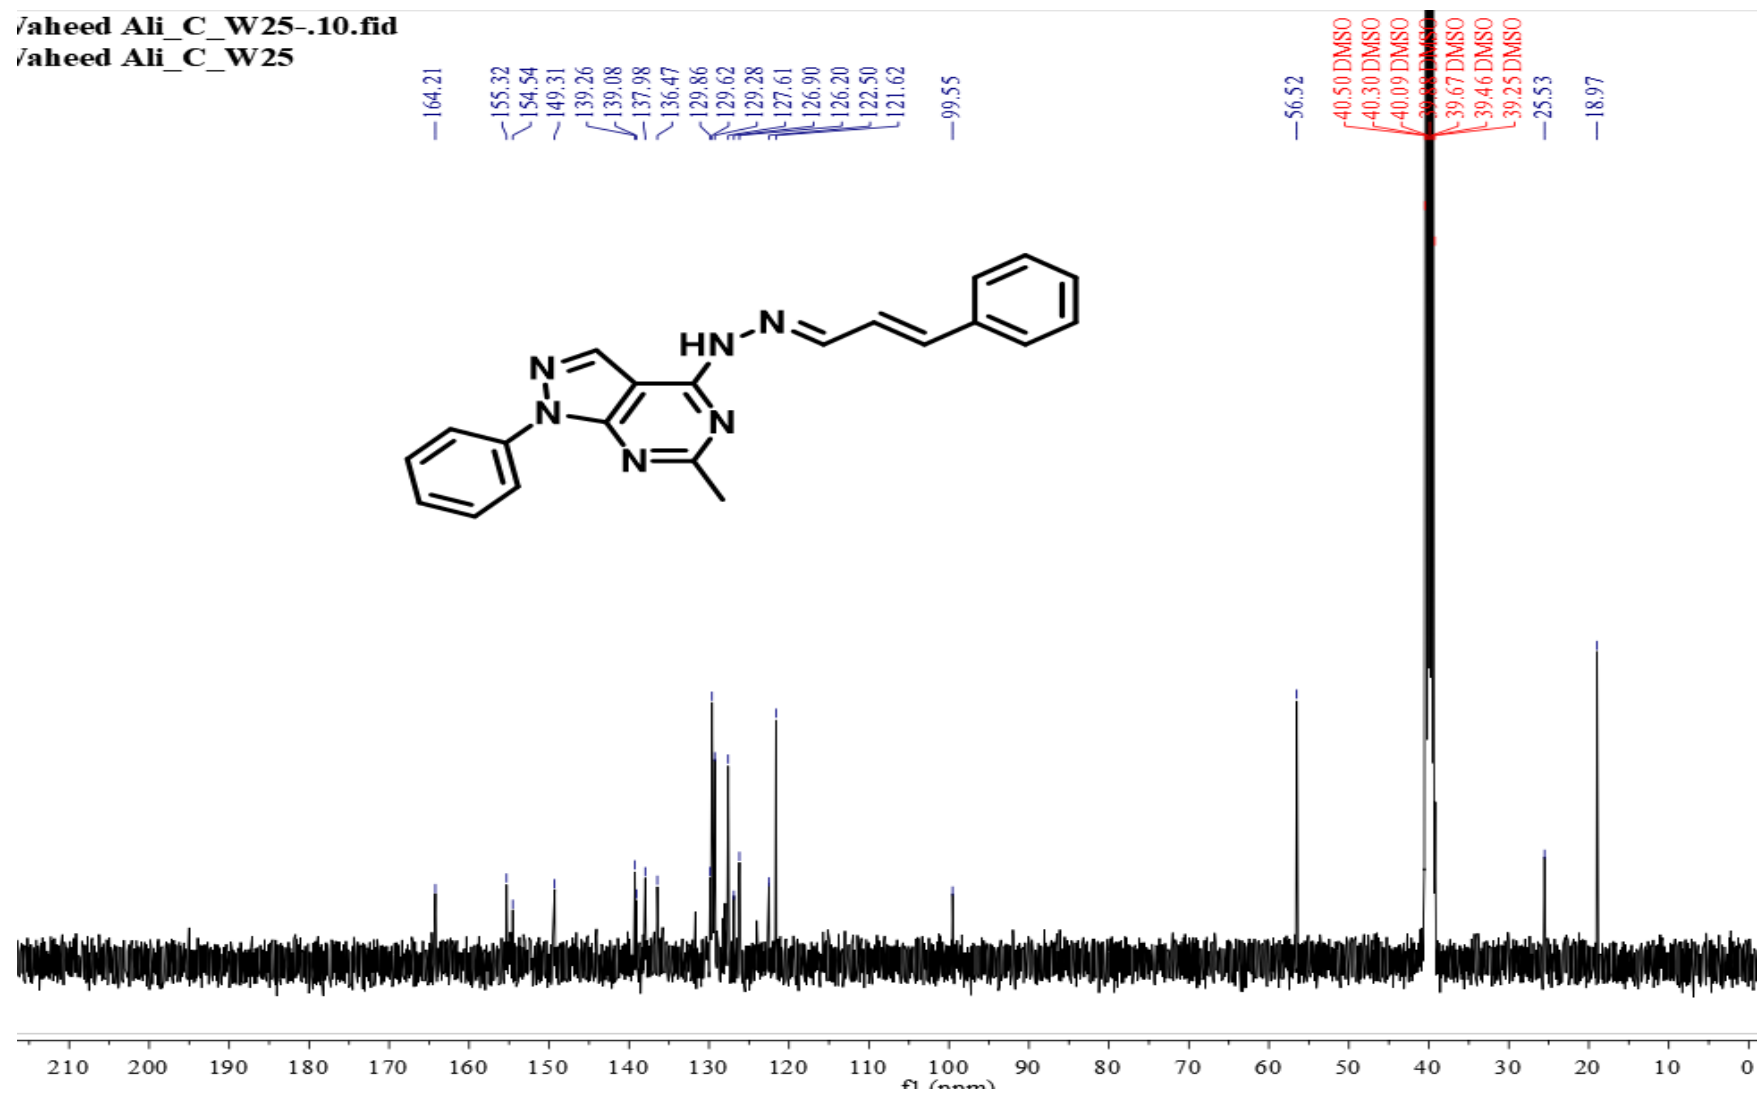

<sup>13</sup>C NMR of Compound 5h

wahed-ali-w25 #134-157 RT: 2.26-2.64 AV: 24 SB: 2 4.45 , 4.45 NL: 5.43E4  
T: {0,0} + c EI Full ms [40.00-1000.00]

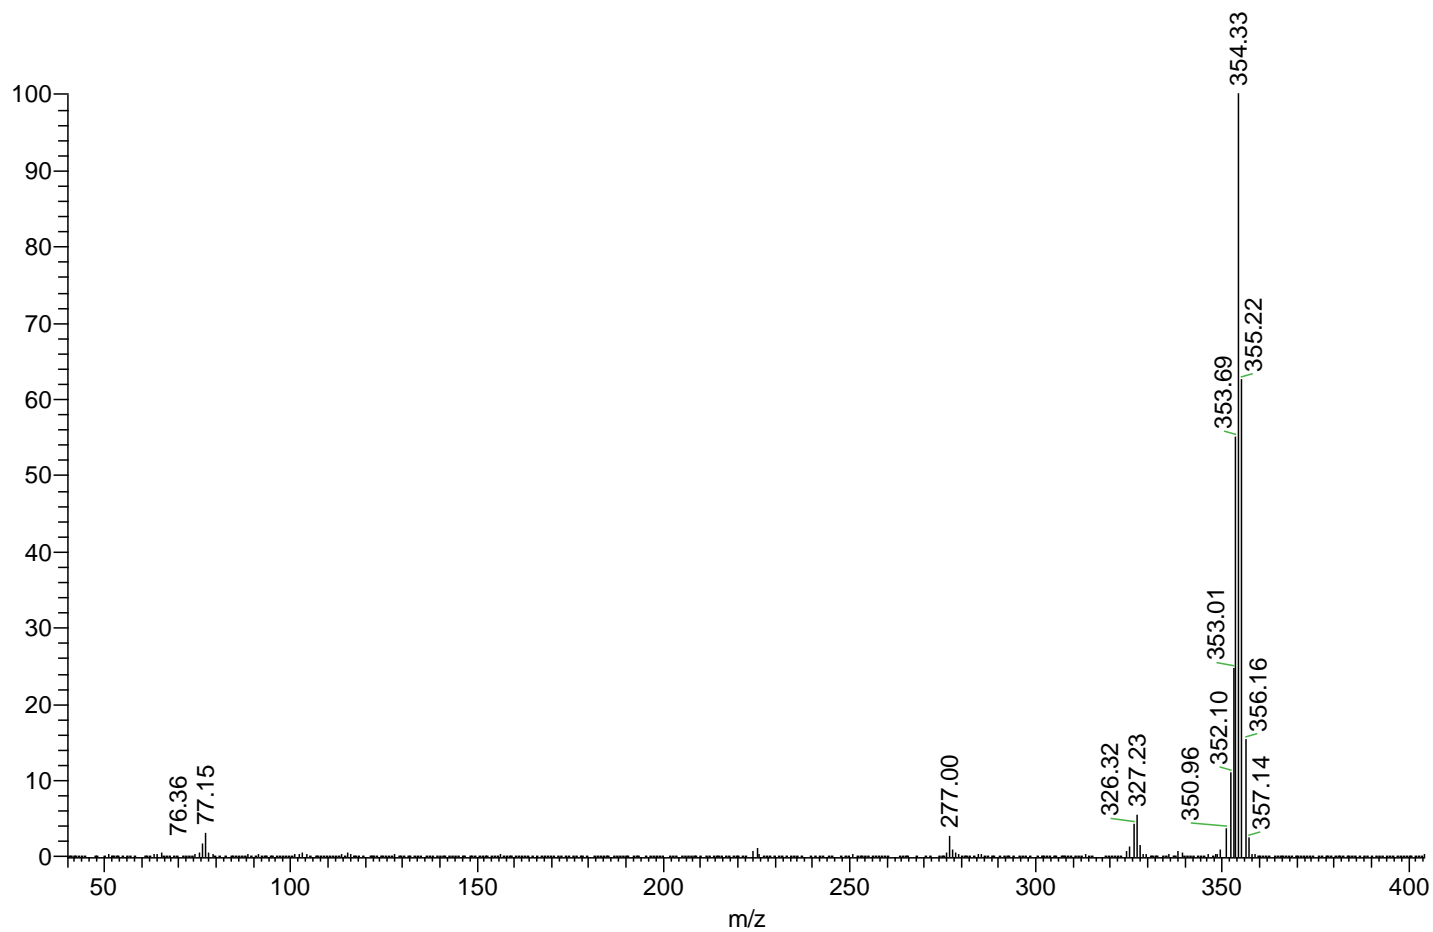

Mass of Compound 5h

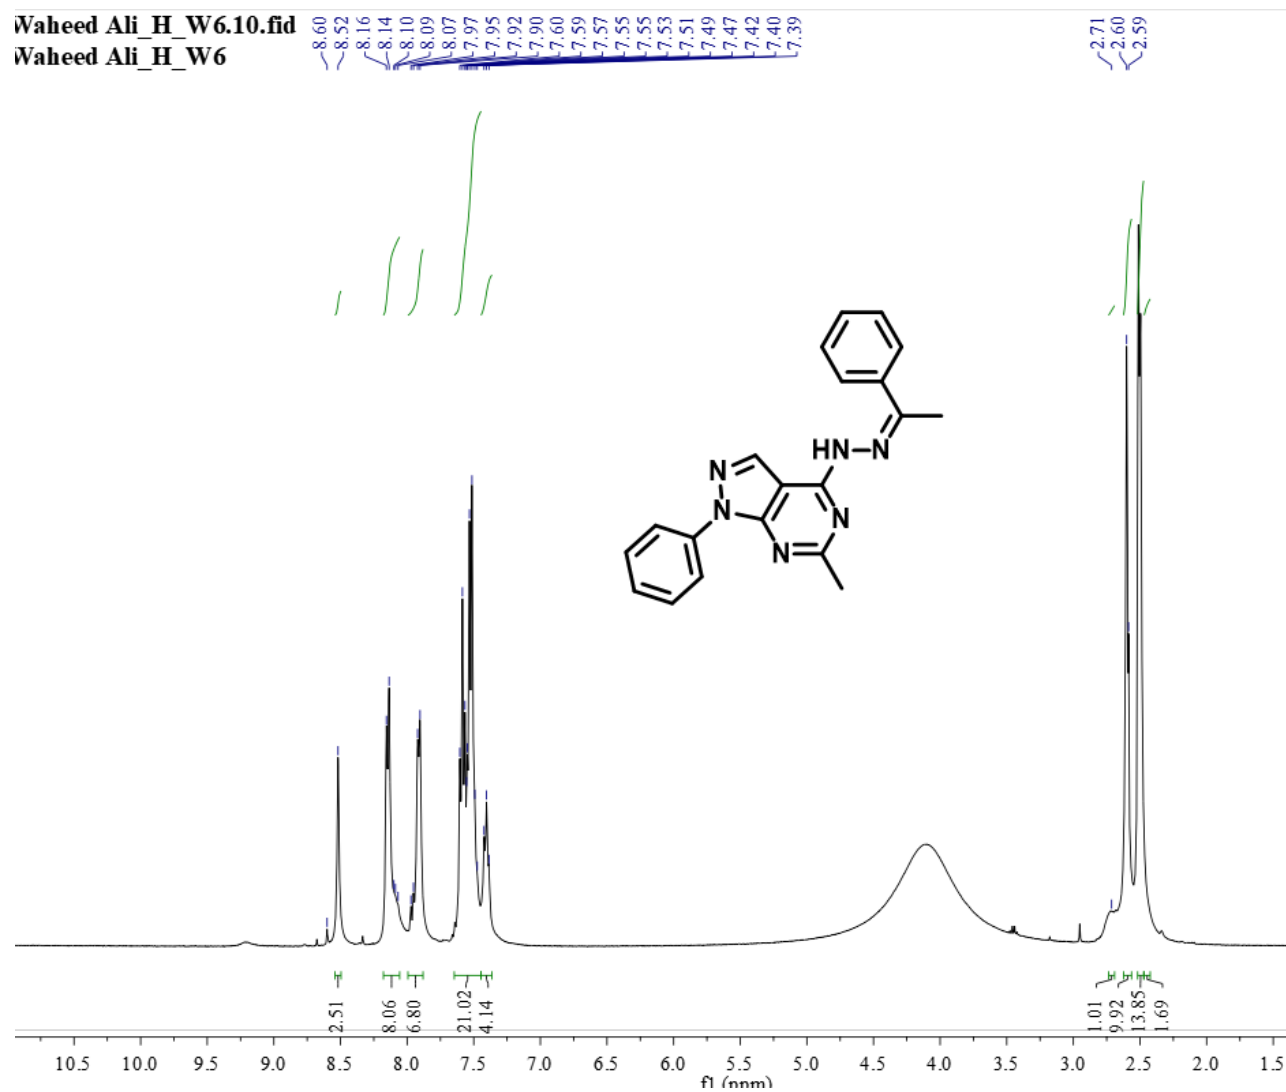

<sup>1</sup>H NMR of Compound 5i

Waheed Ali\_C\_W6-10.fid  
Waheed Ali\_C\_W6

160.46  
155.46  
153.84  
153.52  
152.01  
138.53  
137.95  
136.72  
133.65  
130.35  
129.69  
129.20  
128.58  
126.95  
121.89  
121.63  
113.88

99.41

27.15  
24.12  
15.19

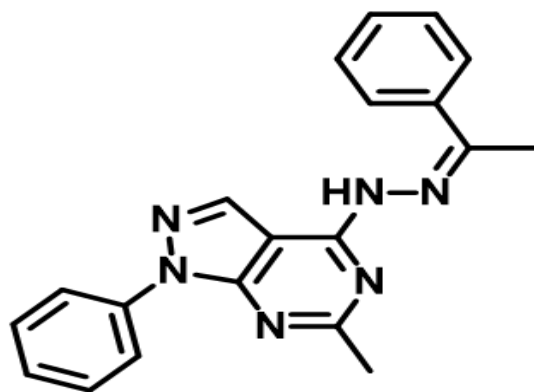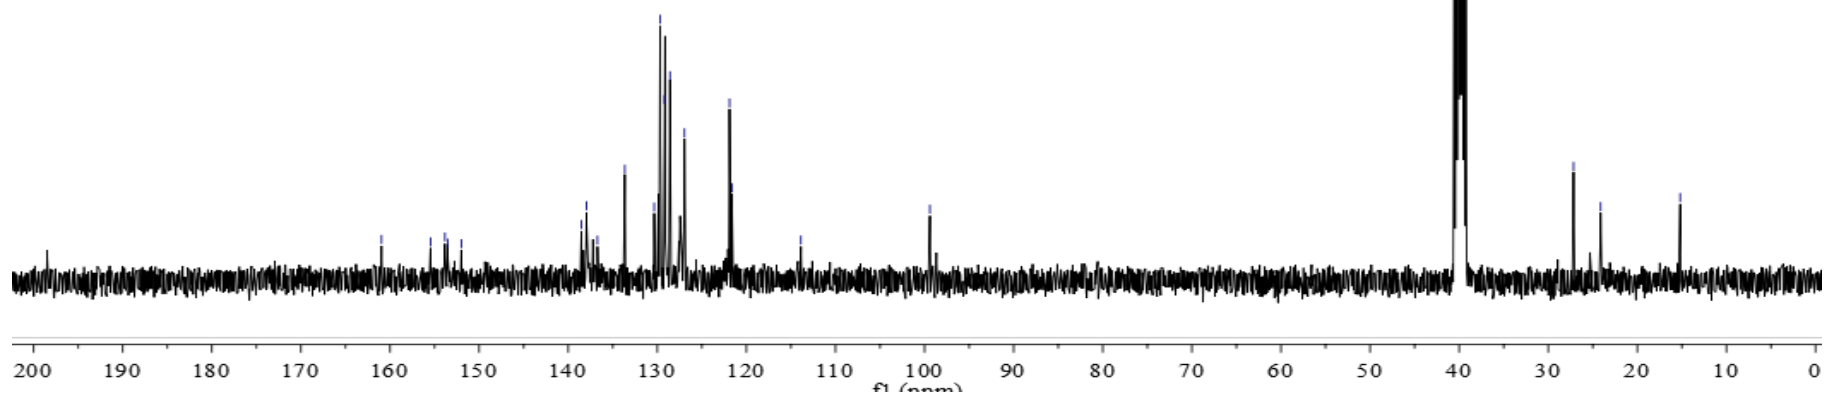

<sup>13</sup>C NMR of Compound 5i

| SAMPLE INFORMATION |                             |                     |                                           |
|--------------------|-----------------------------|---------------------|-------------------------------------------|
| Sample Name:       | W6                          | Acquired By:        | System                                    |
| Sample Type:       | Unknown                     | Sample Set Name:    | errere                                    |
| Vial:              | 18                          | Acq. Method Set:    | FTANInstrument                            |
| Injection #:       | 1                           | Processing Method:  | Default                                   |
| Injection Volume:  | 10.00 ul                    | Channel Name:       | 234.0nm                                   |
| Run Time:          | 26.0 Minutes                | Proc. Chnl. Descr.: | 986 FDA.234.0 nm(FDA.210.0 to 800.0 nm)at |
| Date Acquired:     | 9/24/2023 12:40:00 AM(EEST) |                     |                                           |
| Date Processed:    | 9/24/2023 10:22:58 AM(EEST) |                     |                                           |

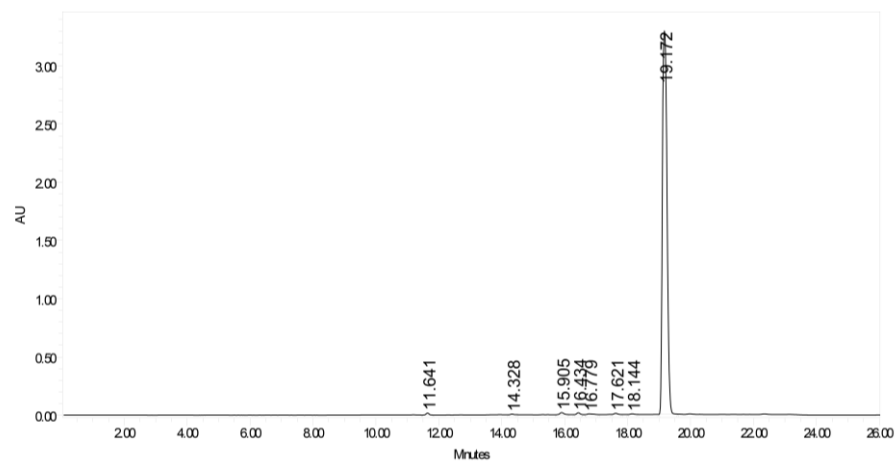

|   | RT     | Area     | %Area | Hight   |
|---|--------|----------|-------|---------|
| 1 | 11.641 | 111066   | 0.32  | 16902   |
| 2 | 14.328 | 34834    | 0.10  | 5515    |
| 3 | 15.905 | 147448   | 0.43  | 17126   |
| 4 | 16.434 | 116655   | 0.34  | 15882   |
| 5 | 16.779 | 92146    | 0.27  | 6877    |
| 6 | 17.621 | 73783    | 0.22  | 9694    |
| 7 | 18.144 | 40626    | 0.12  | 5381    |
| 8 | 19.172 | 33669443 | 98.20 | 3300651 |

## HPLC of Compound 5i

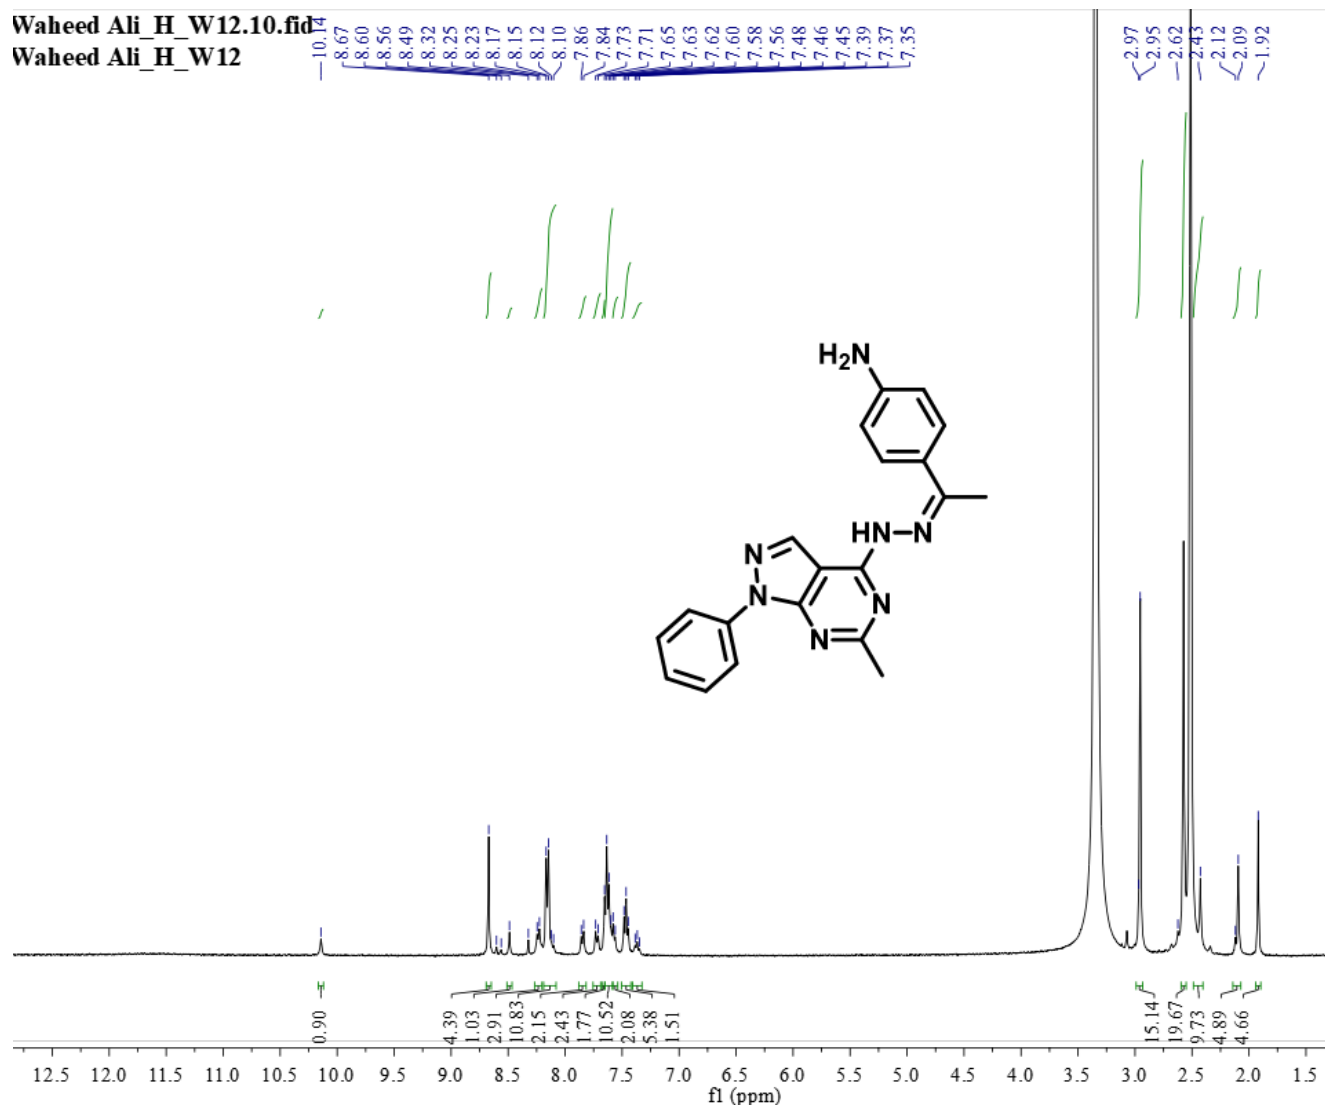

<sup>1</sup>H NMR of Compound 5j

Vaheed Ali\_C\_W12-.10.fid  
Vaheed Ali\_C\_W12

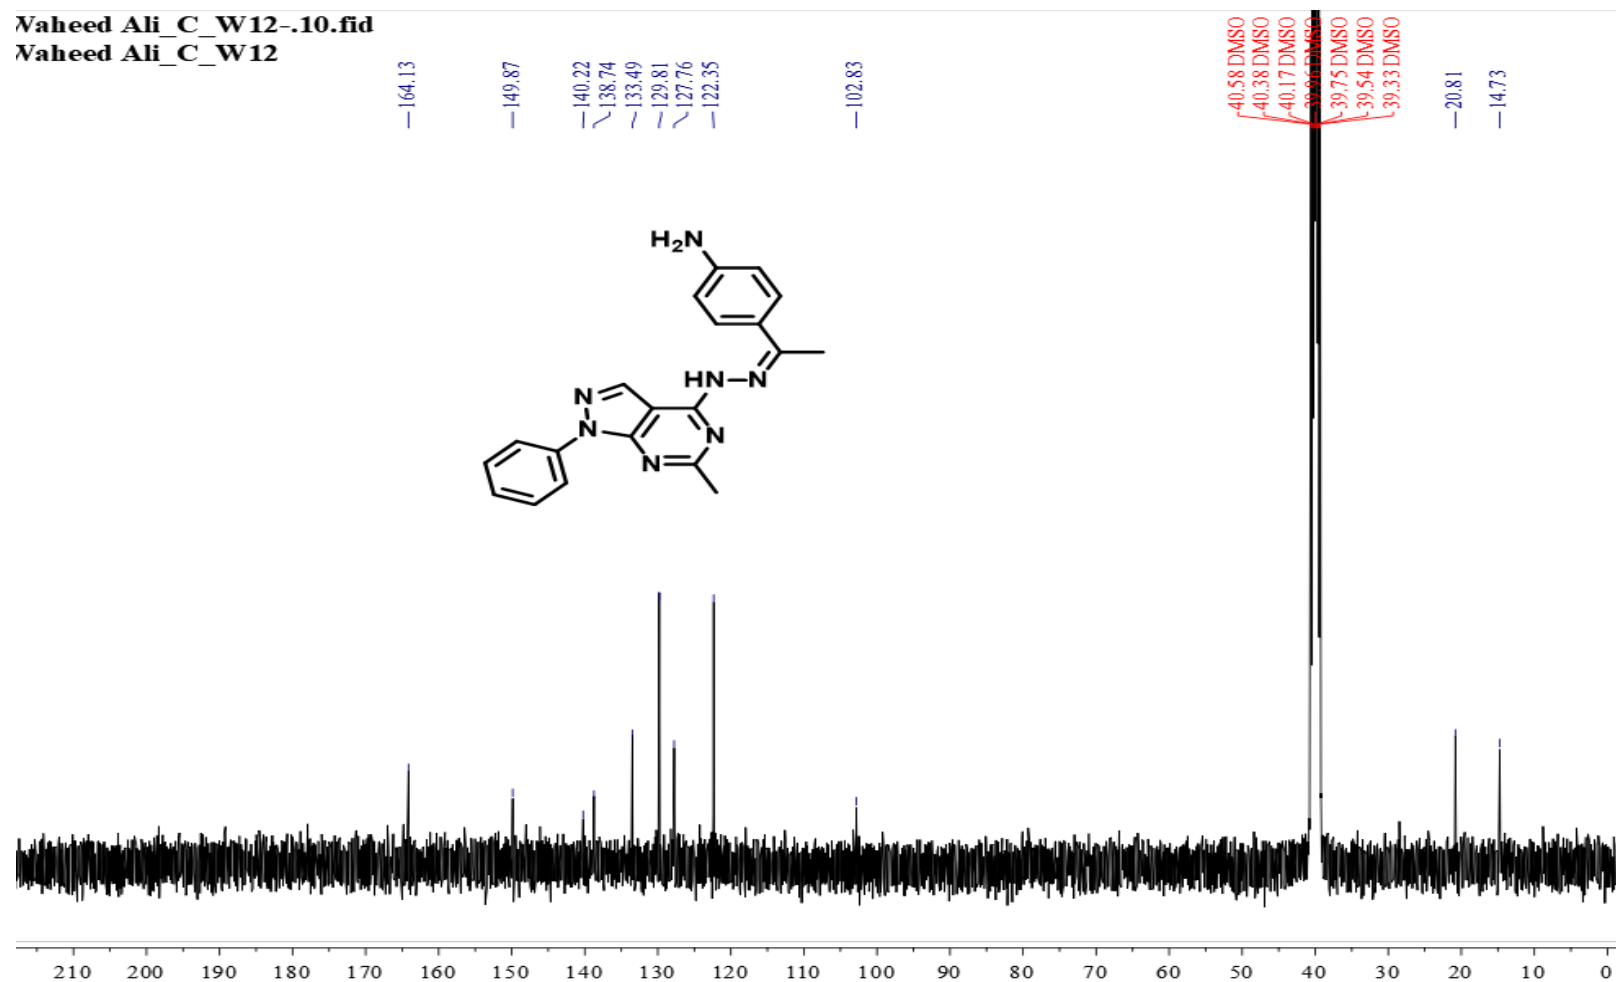

<sup>13</sup>C NMR of Compound 5j



wahed-ali-w12 #101 RT: 1.71 AV: 1 SB: 2 4.45 , 4.45 NL: 4.18E2  
T: {0,0} + c EI Full ms [40.00-1000.00]

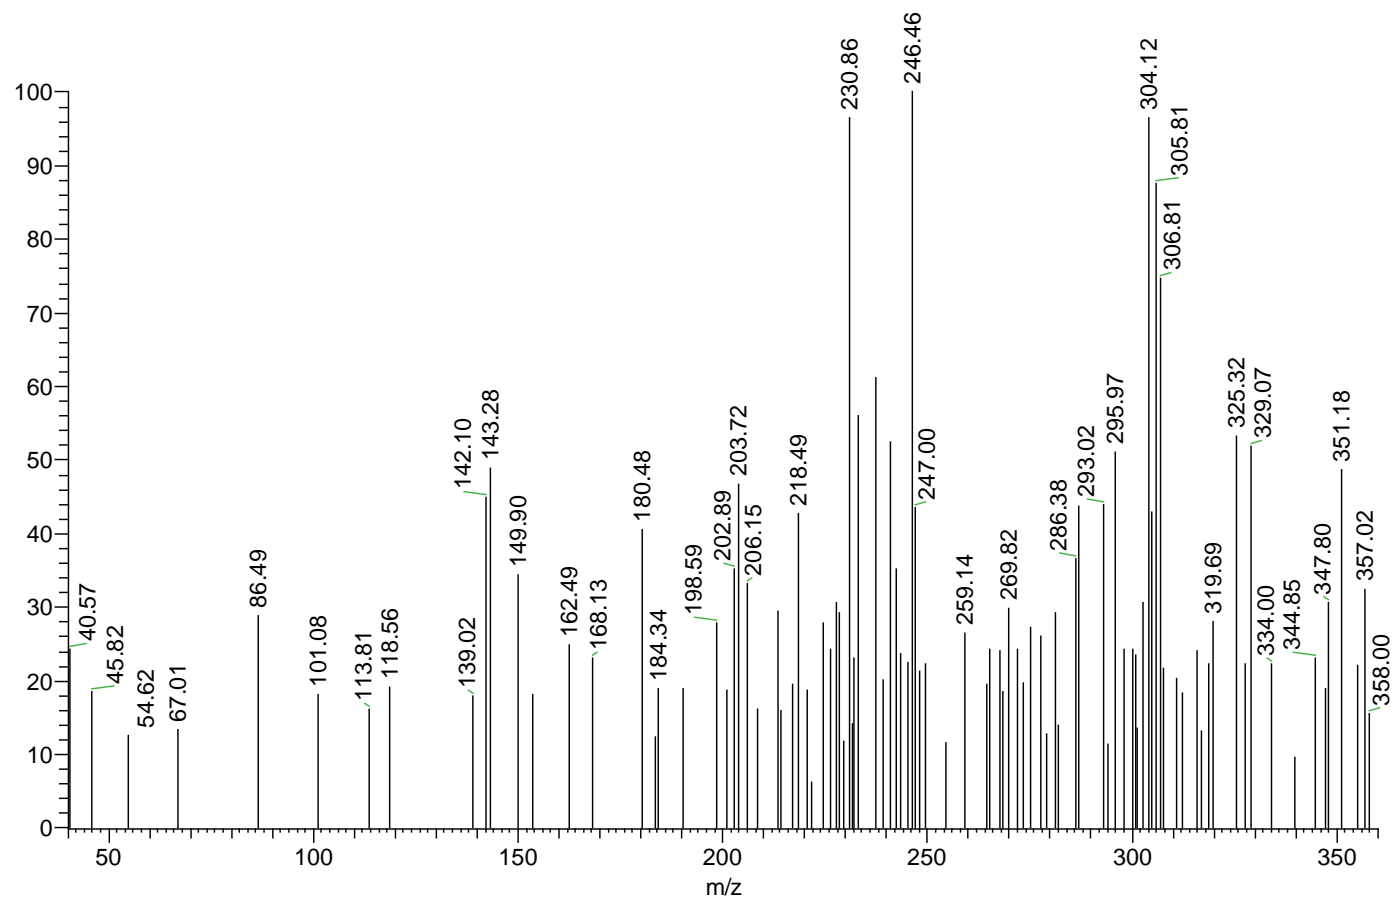

Mass of Compound 5j

Waheed Ali\_H\_W23.10.fid

Waheed Ali\_H\_W23

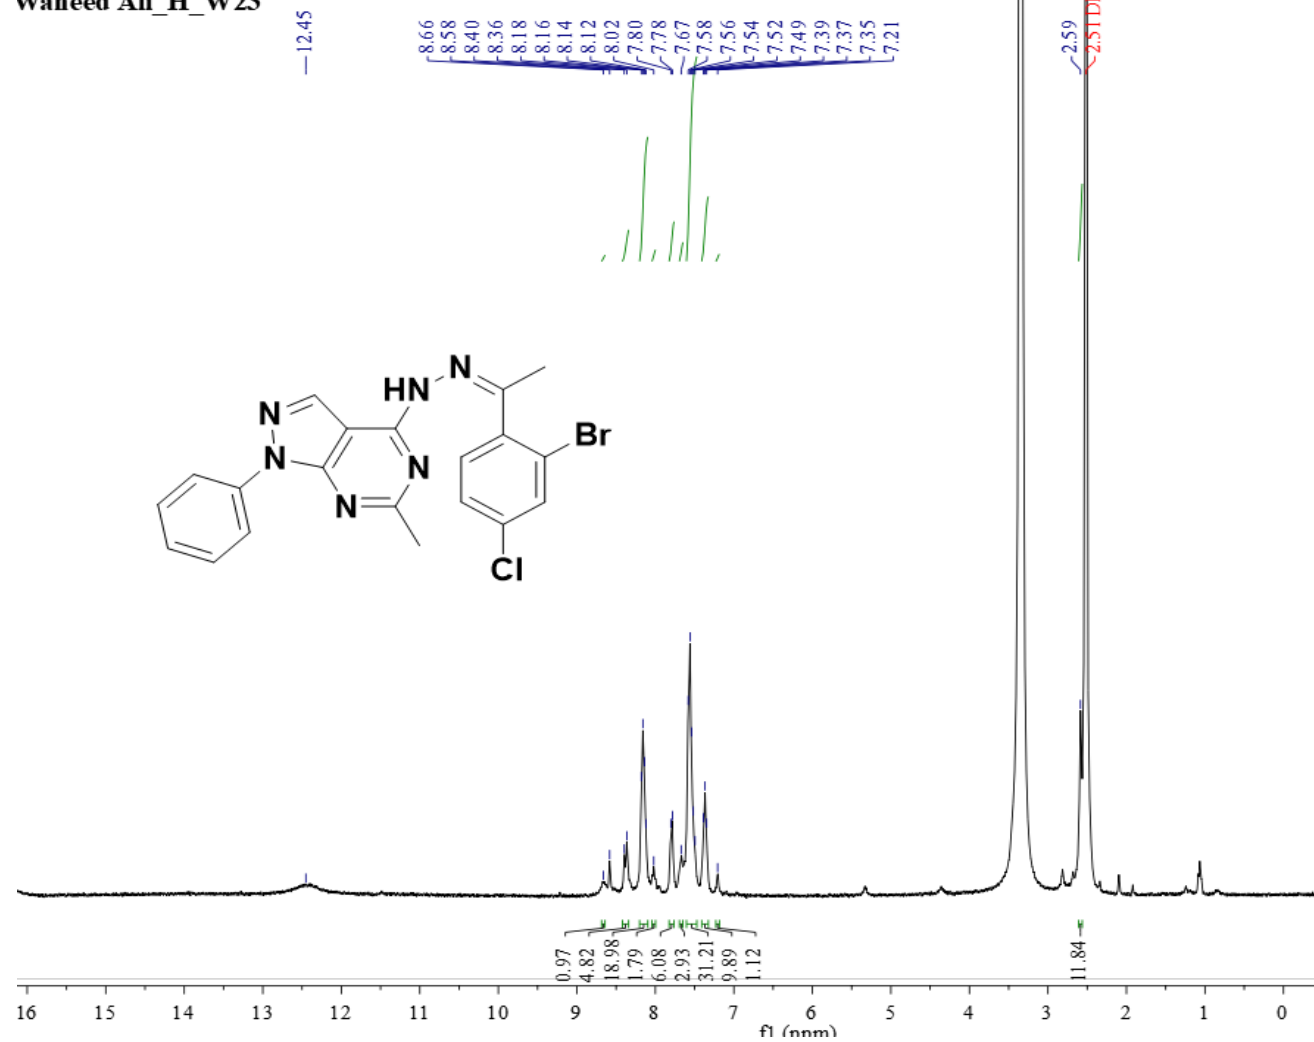

<sup>1</sup>H NMR of Compound 5l

wahed-ali-w23 #173 RT: 2.91 AV: 1 SB: 2 4.45 , 4.45 NL: 3.19E2  
T: {0,0} + c EI Full ms [40.00-1000.00]

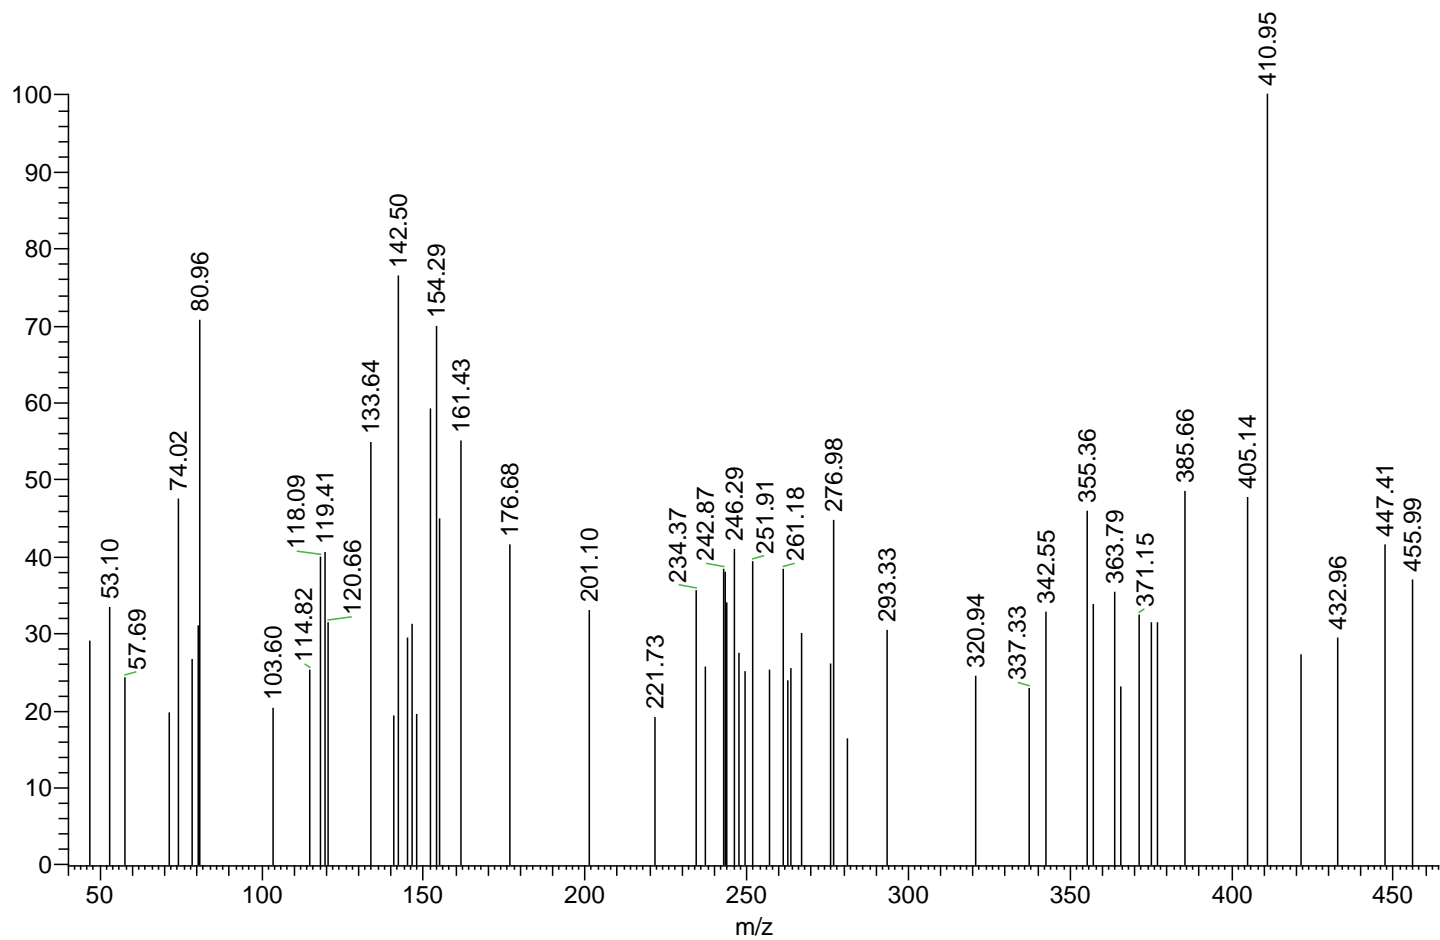

Mass of Compound 51

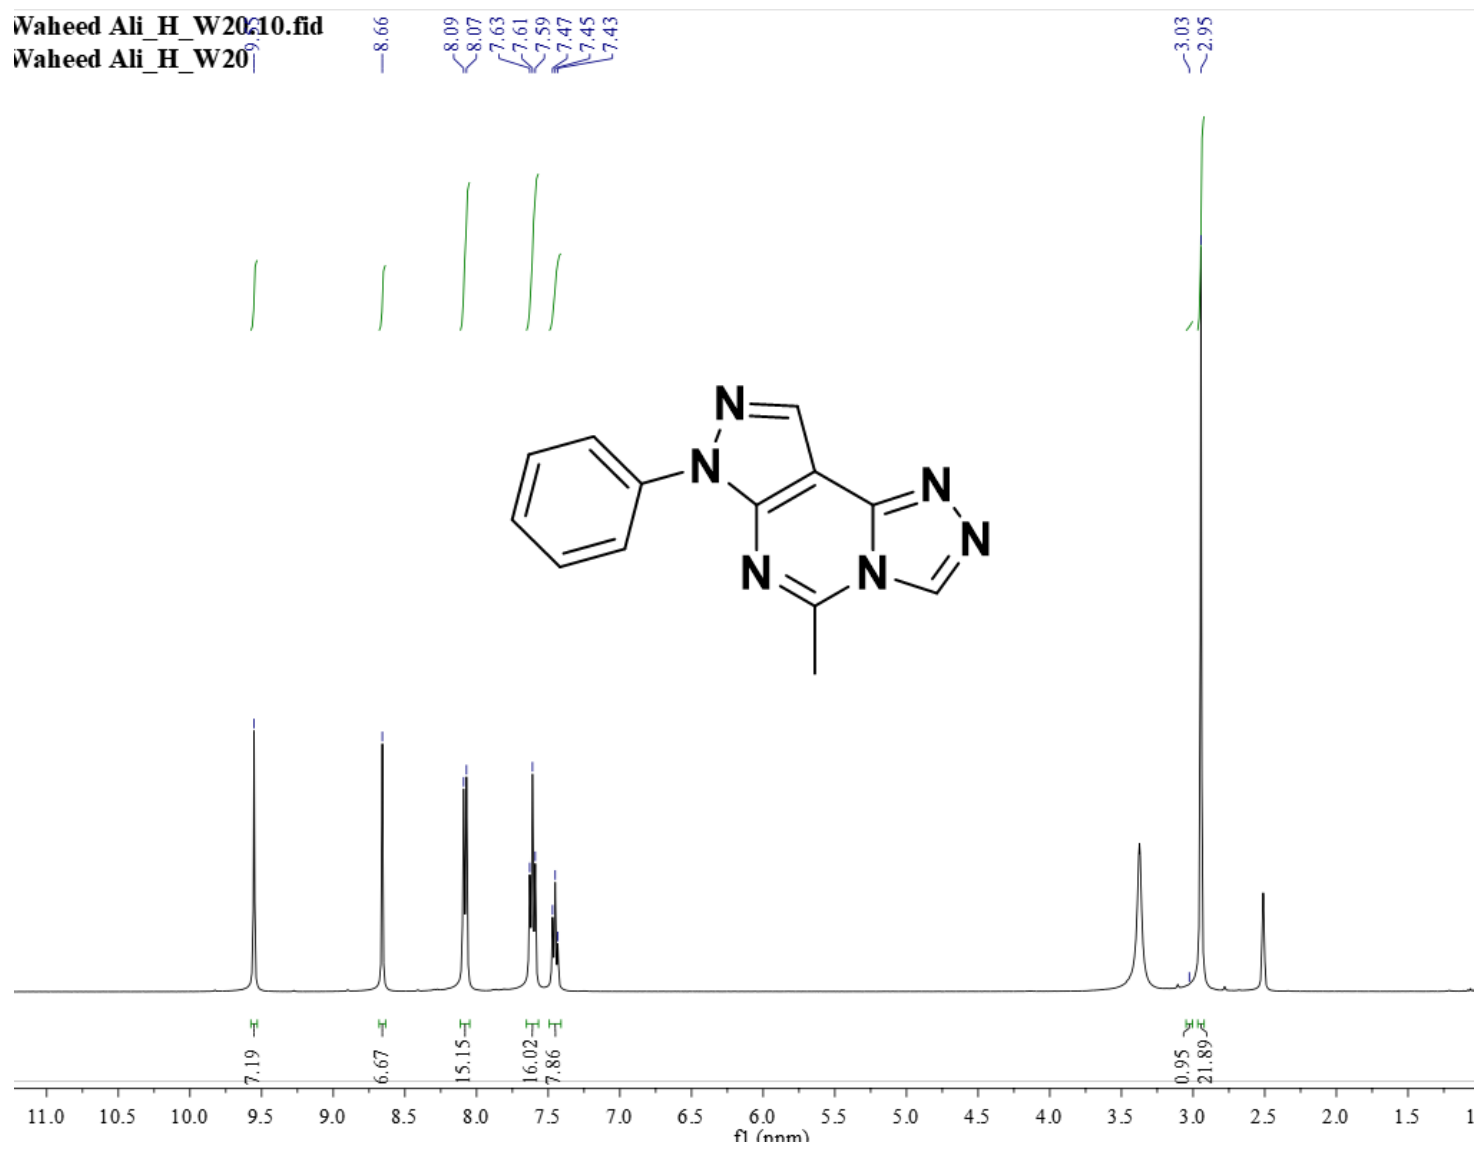

$^1\text{H}$  NMR of compound 6a

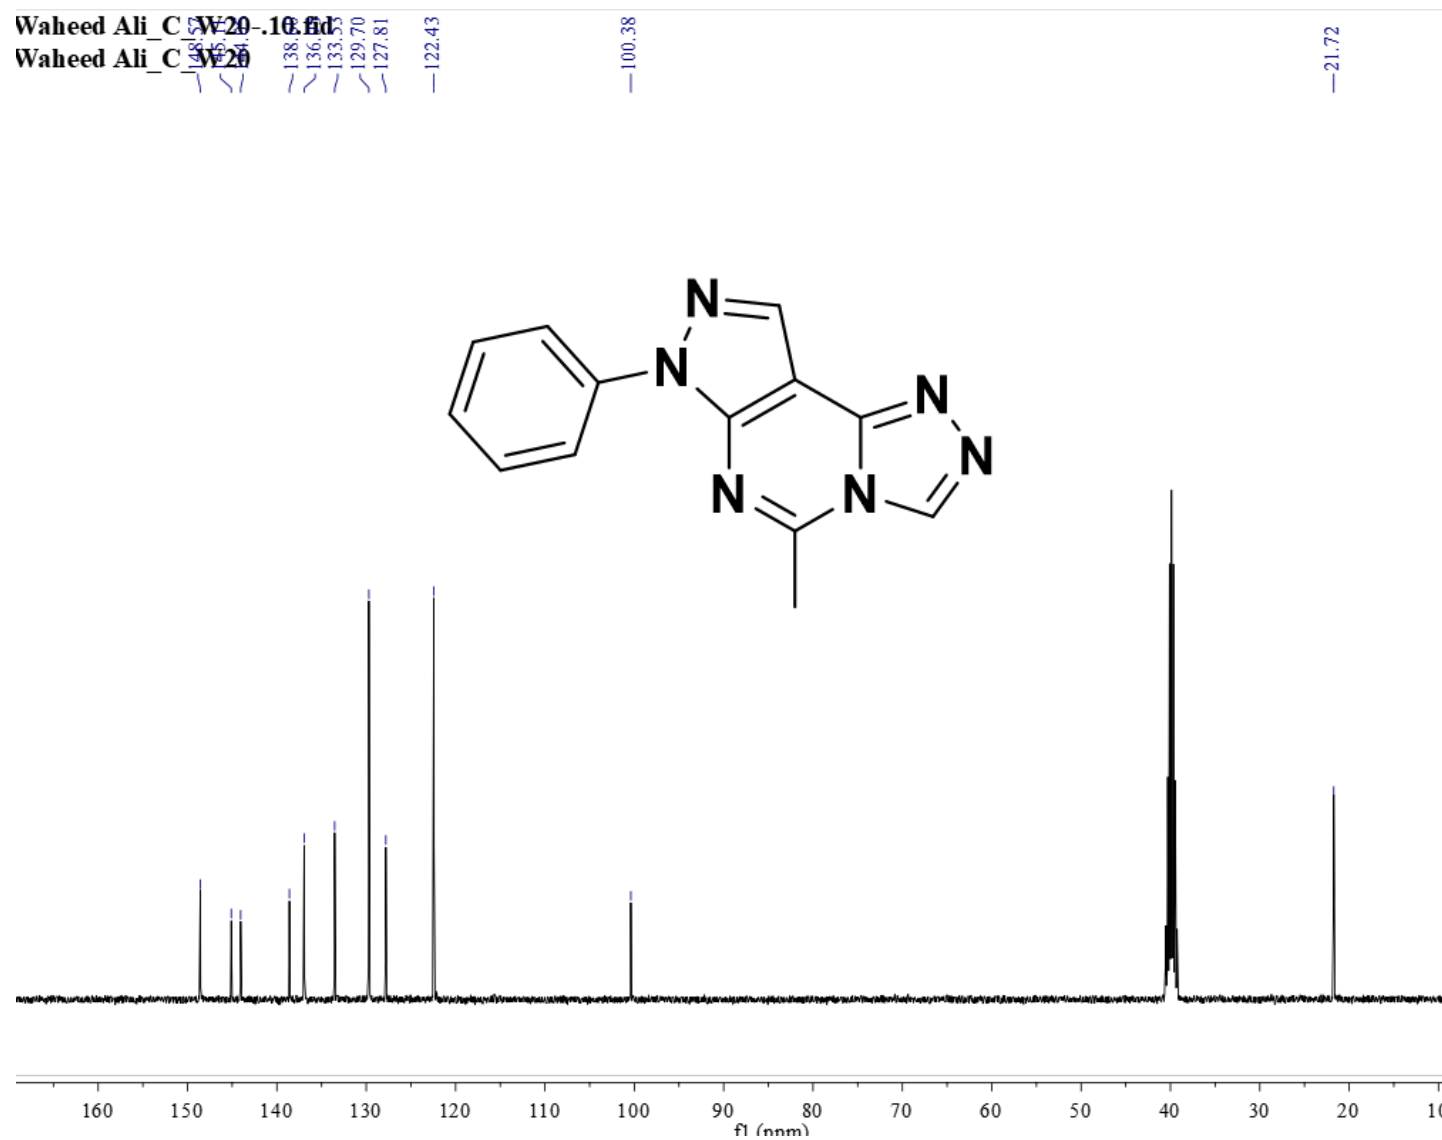

$^{13}\text{C}$  NMR of compound 6a

wahed-ali-w20 #125-185 RT: 2.11-3.11 AV: 61 SB: 2 4.45, 4.45 NL: 5.21E3  
T: {0,0} + c EI Full ms [40.00-1000.00]

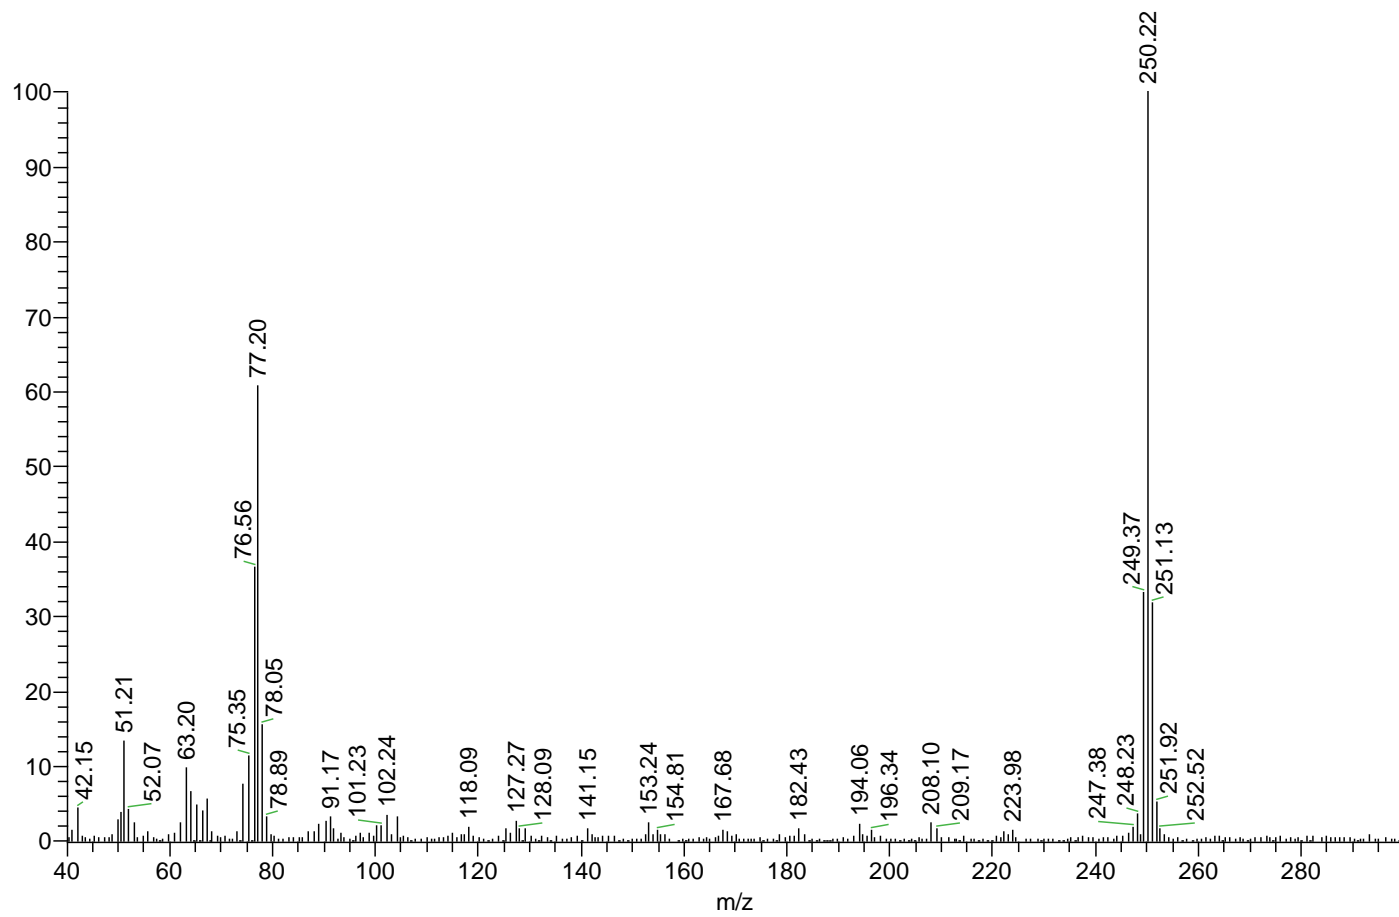

Mass of Compound 6a

Waheed Ali\_H\_W3010.fid

Waheed Ali\_H\_W30

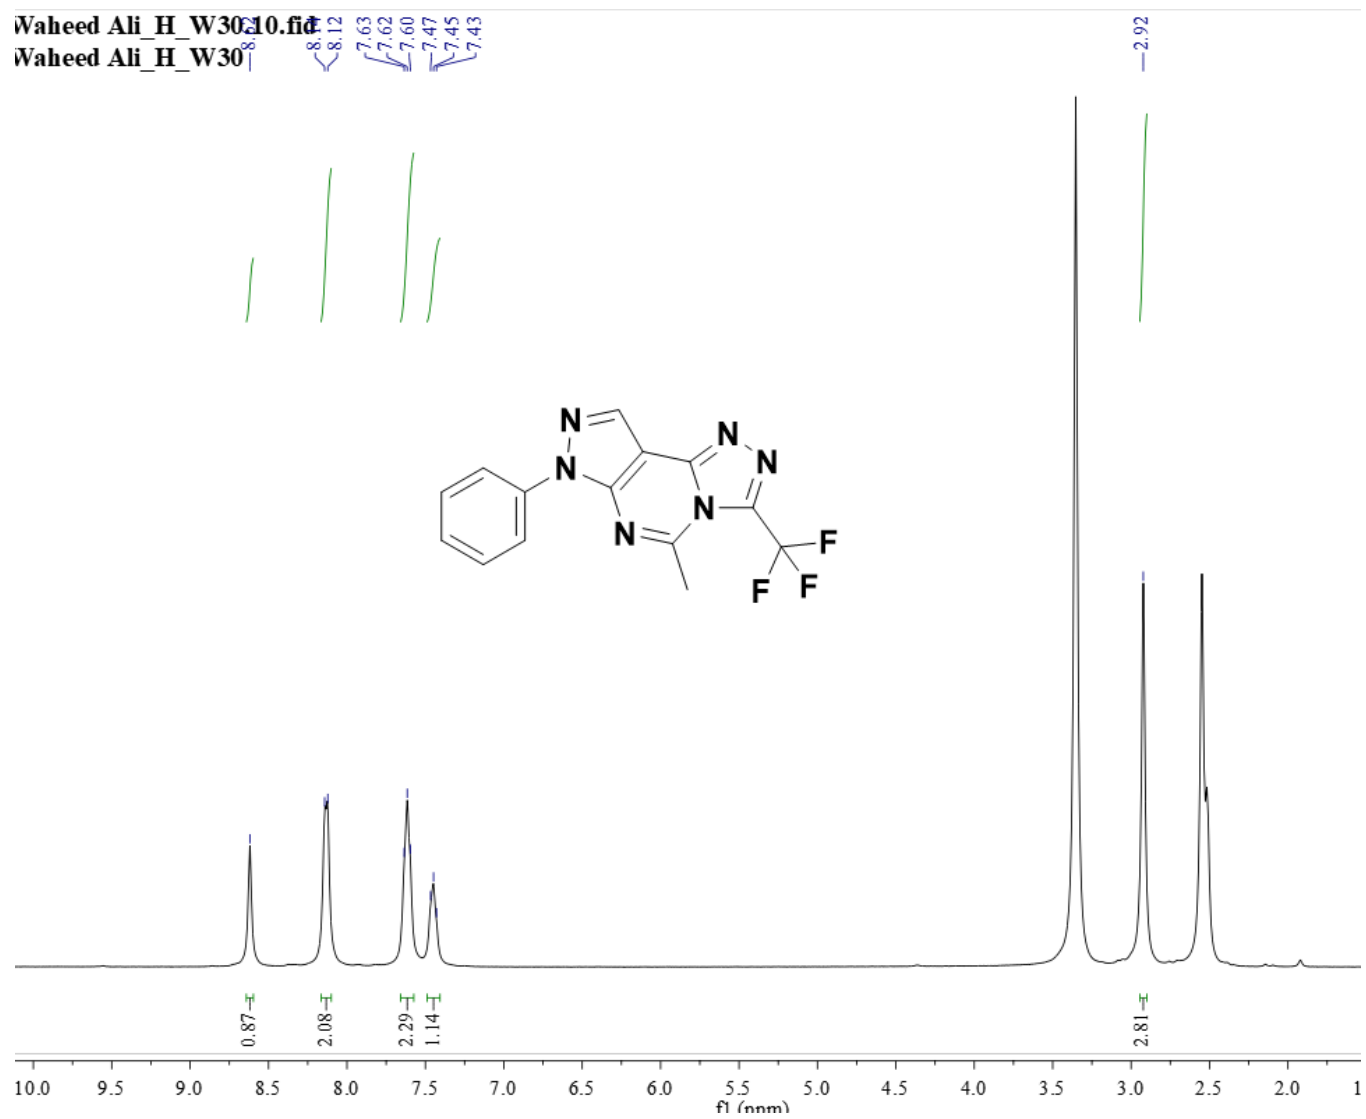

$^1\text{H}$  NMR of compound 6b

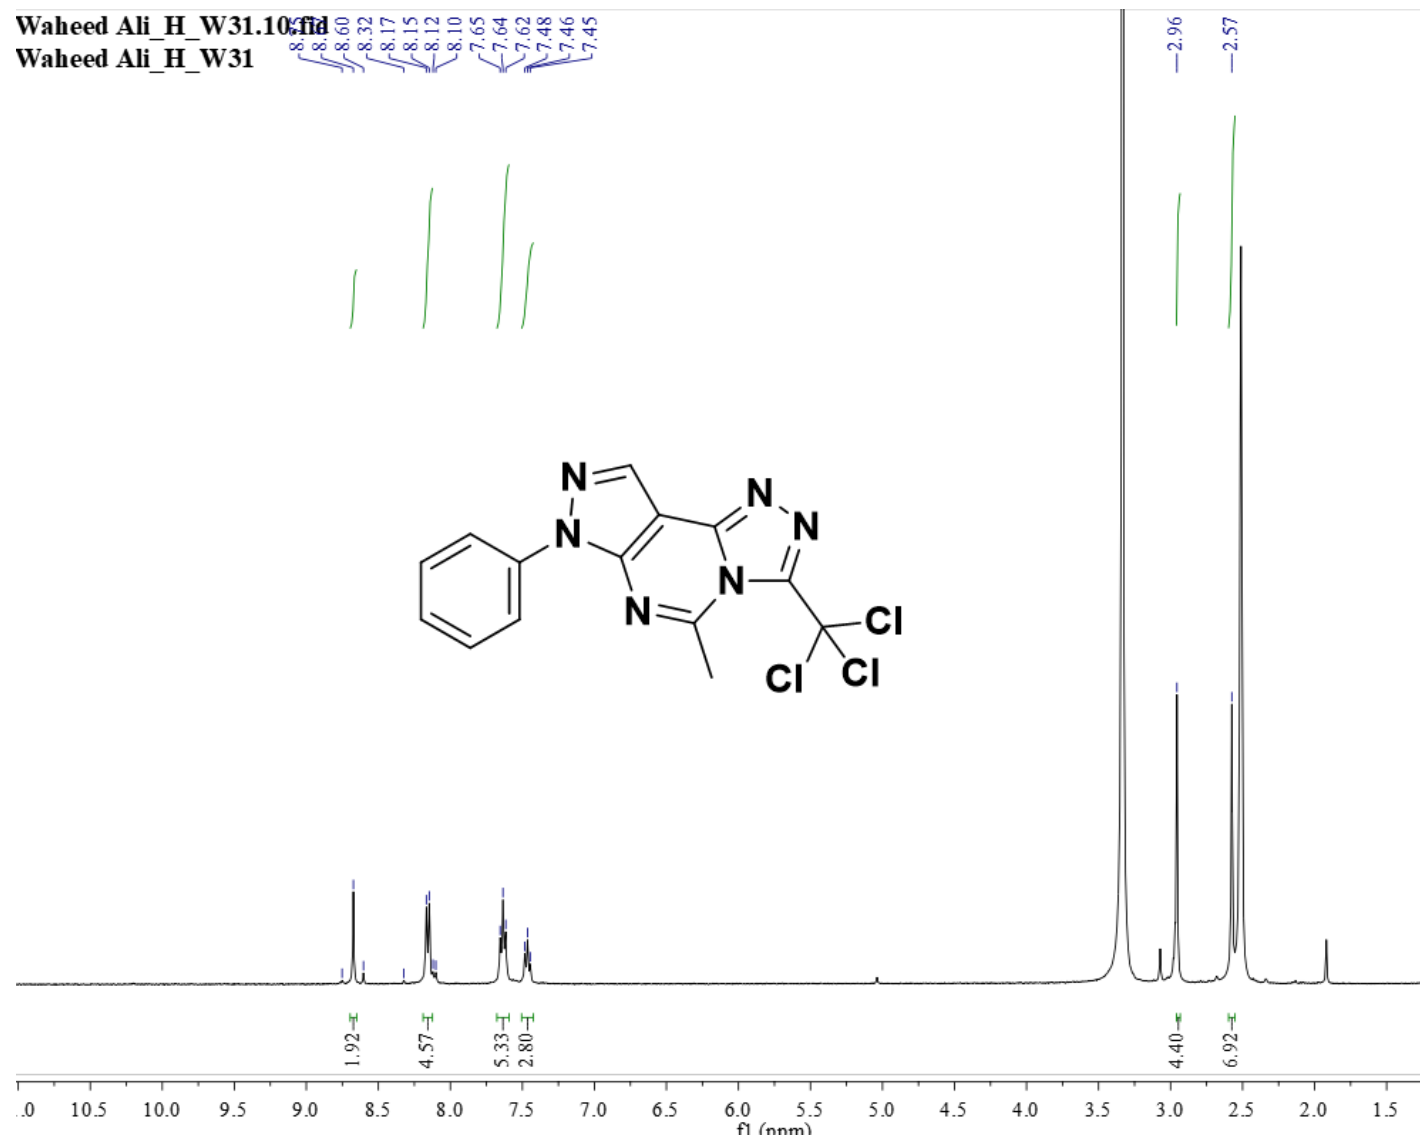

<sup>1</sup>H NMR of compound 6c



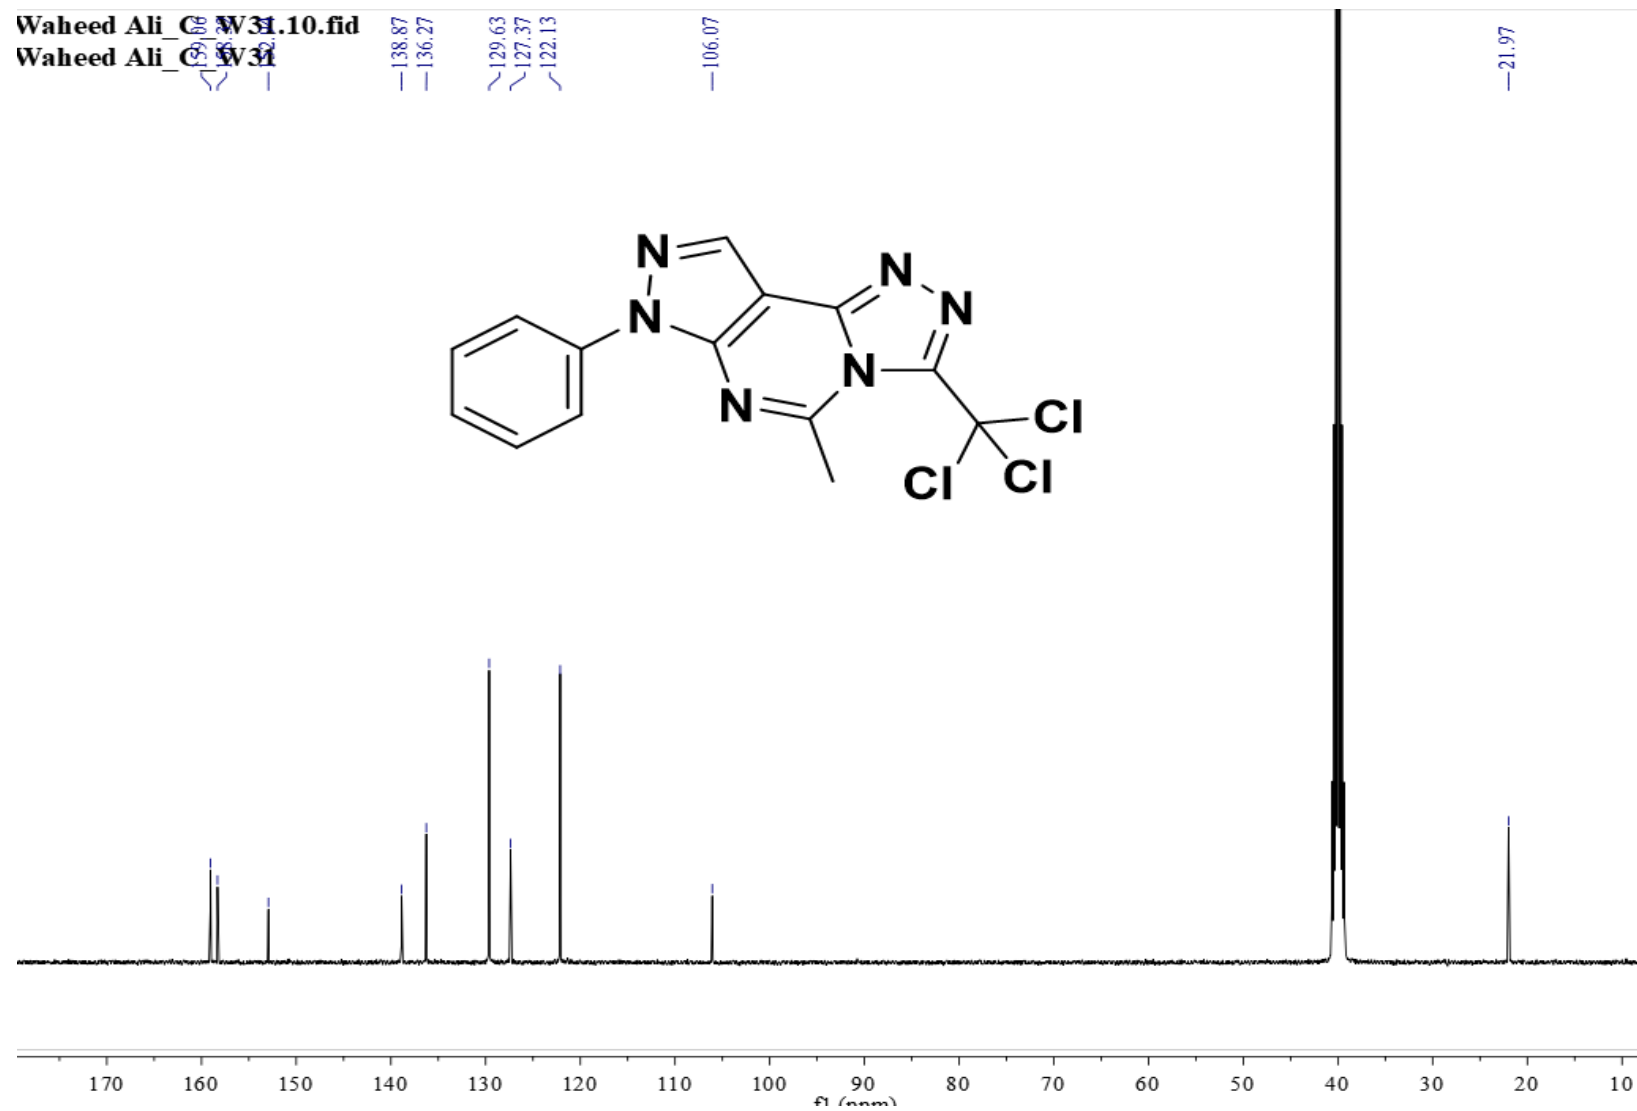

<sup>13</sup>C NMR of compound 6c

Waheed Ali\_H\_W15

Microanalytical Unit - FOPCU - NMR laboratory  
www.pharma.cu.edu.eg dir-mau.fopcu@pharma.cu.edu.eg

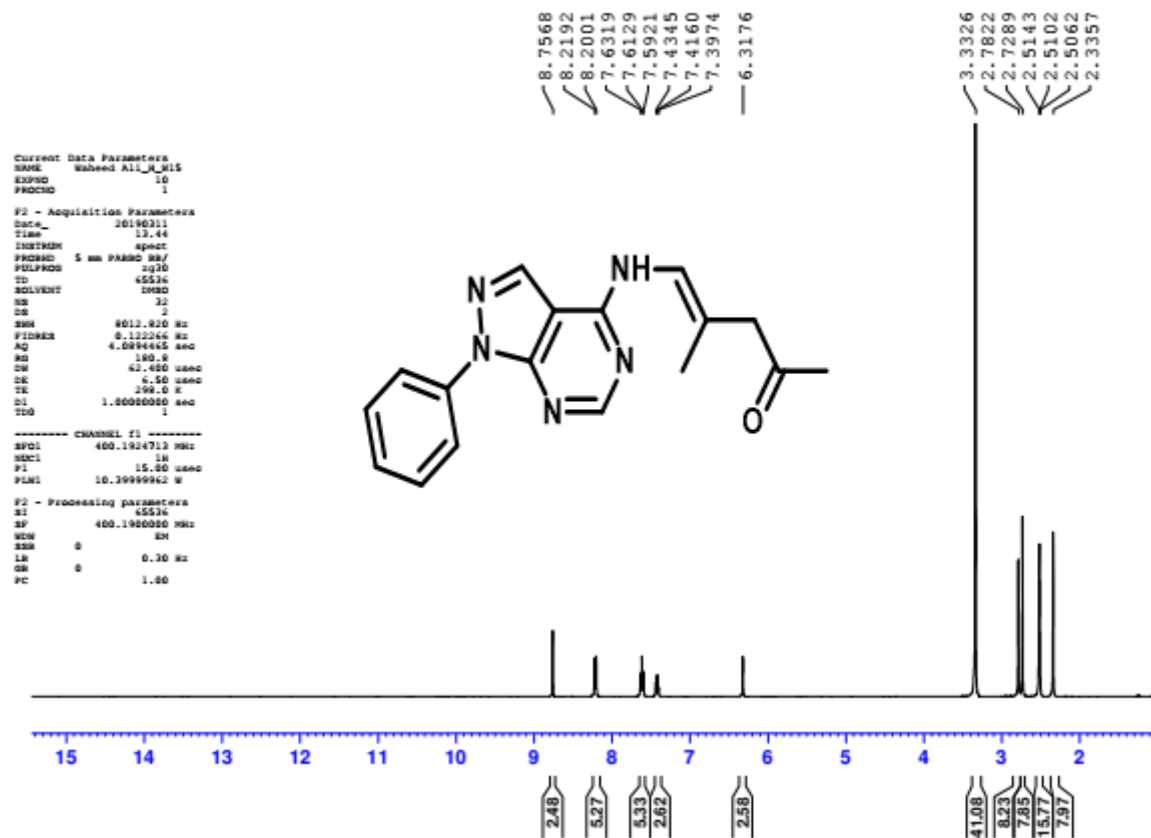

<sup>1</sup>H NMR of compound 6d

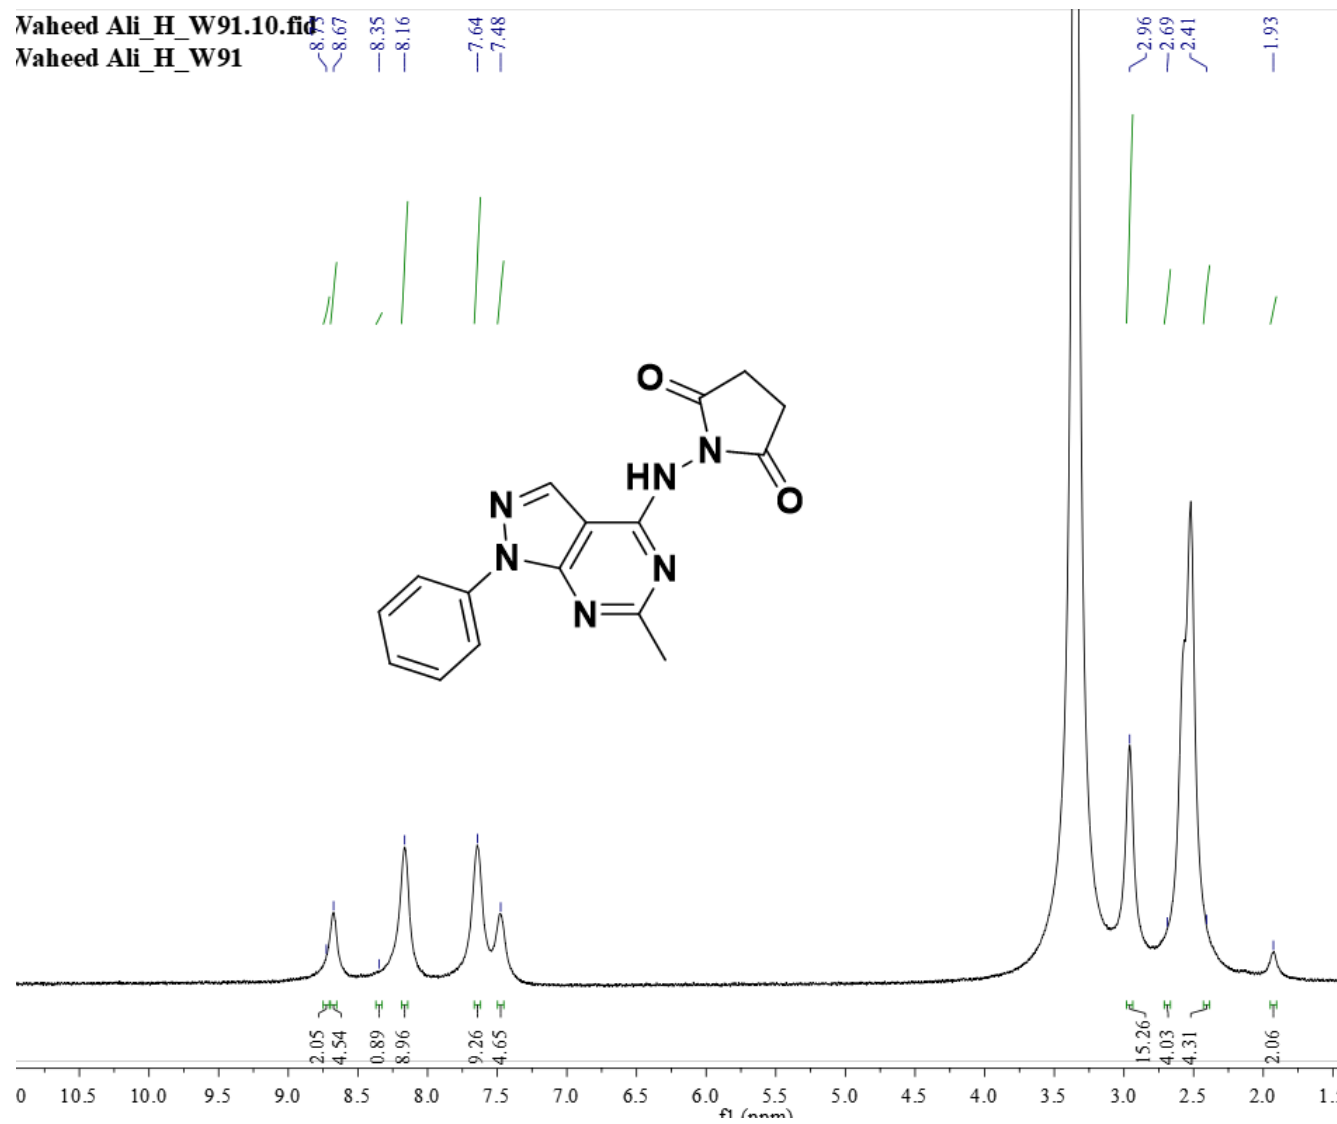

<sup>1</sup>H NMR of compound 7

wahed-ali-w91 #116 RT: 1.96 AV: 1 SB: 2 4.45 , 4.45 NL: 5.07E2  
T: {0,0} + c EI Full ms [40.00-1000.00]

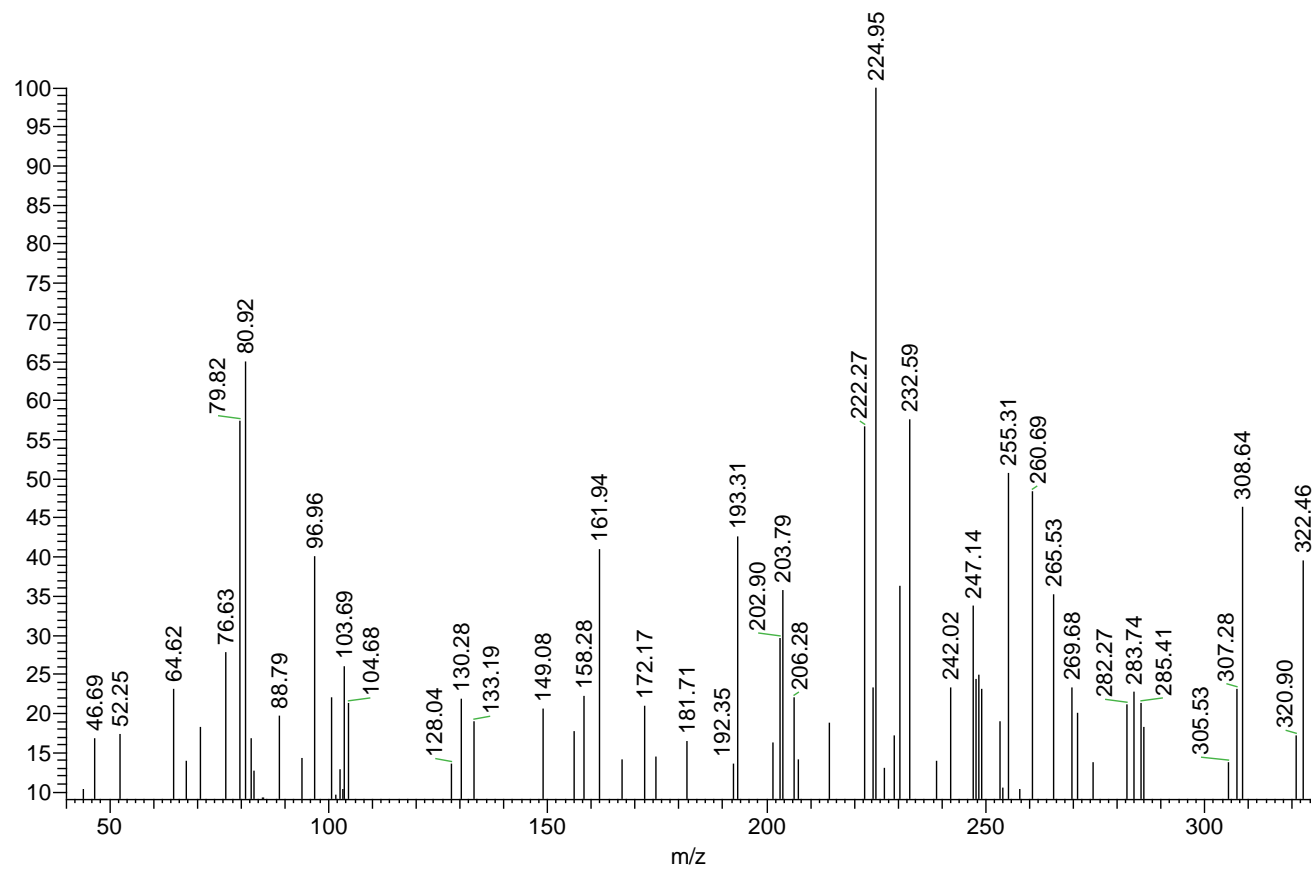

Mass of compound 7

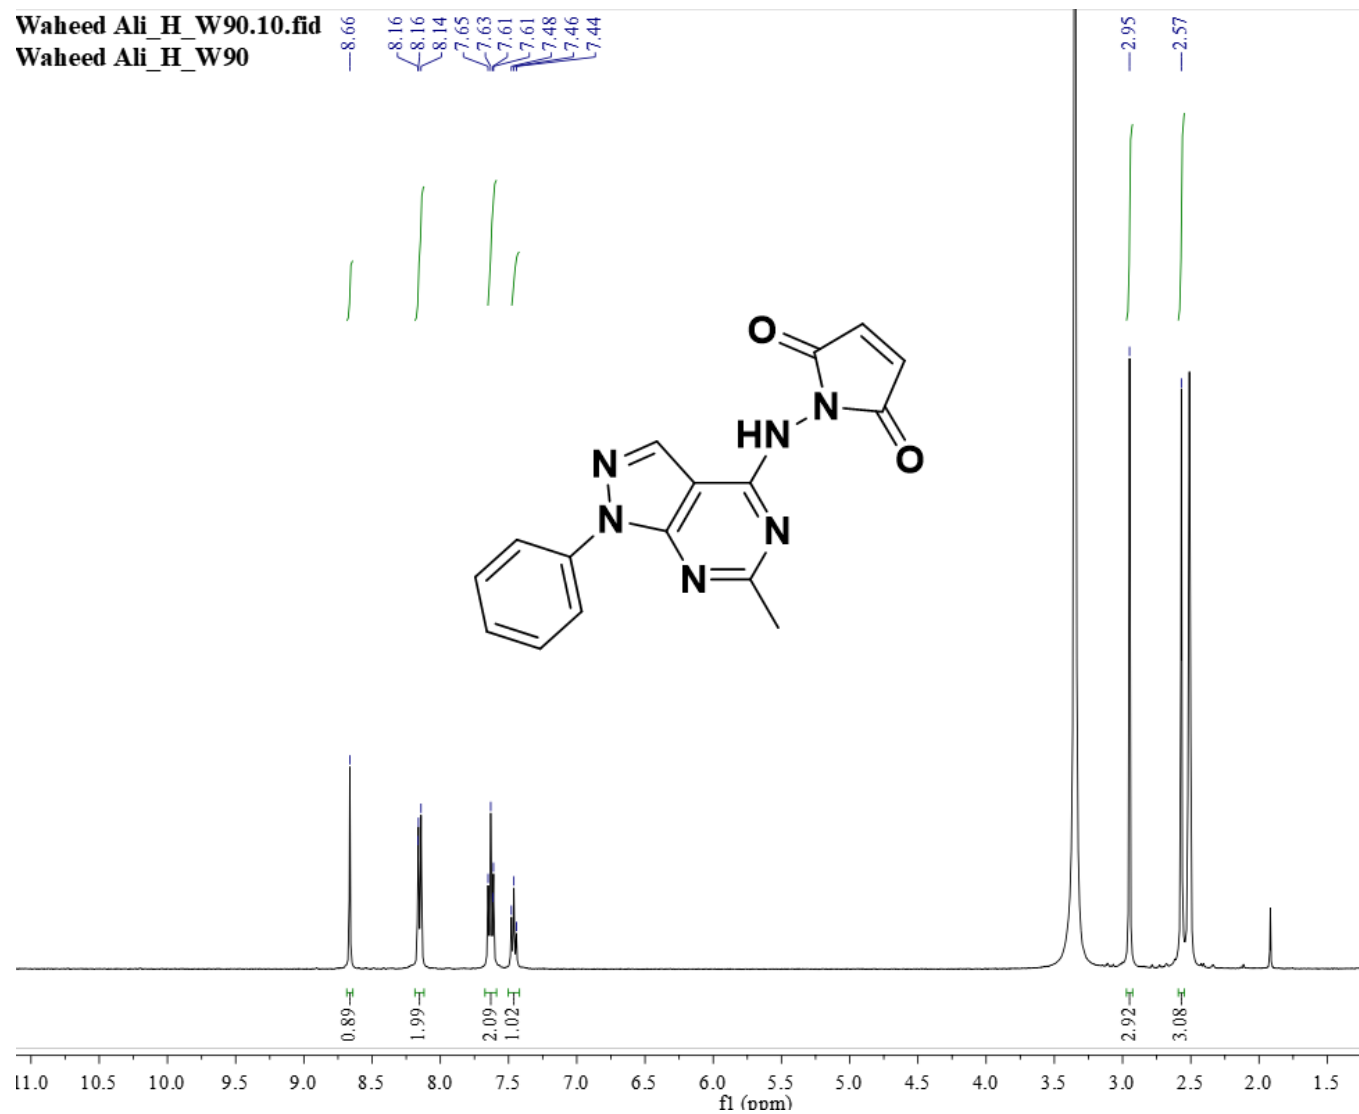

$^1\text{H}$  NMR of compound 8

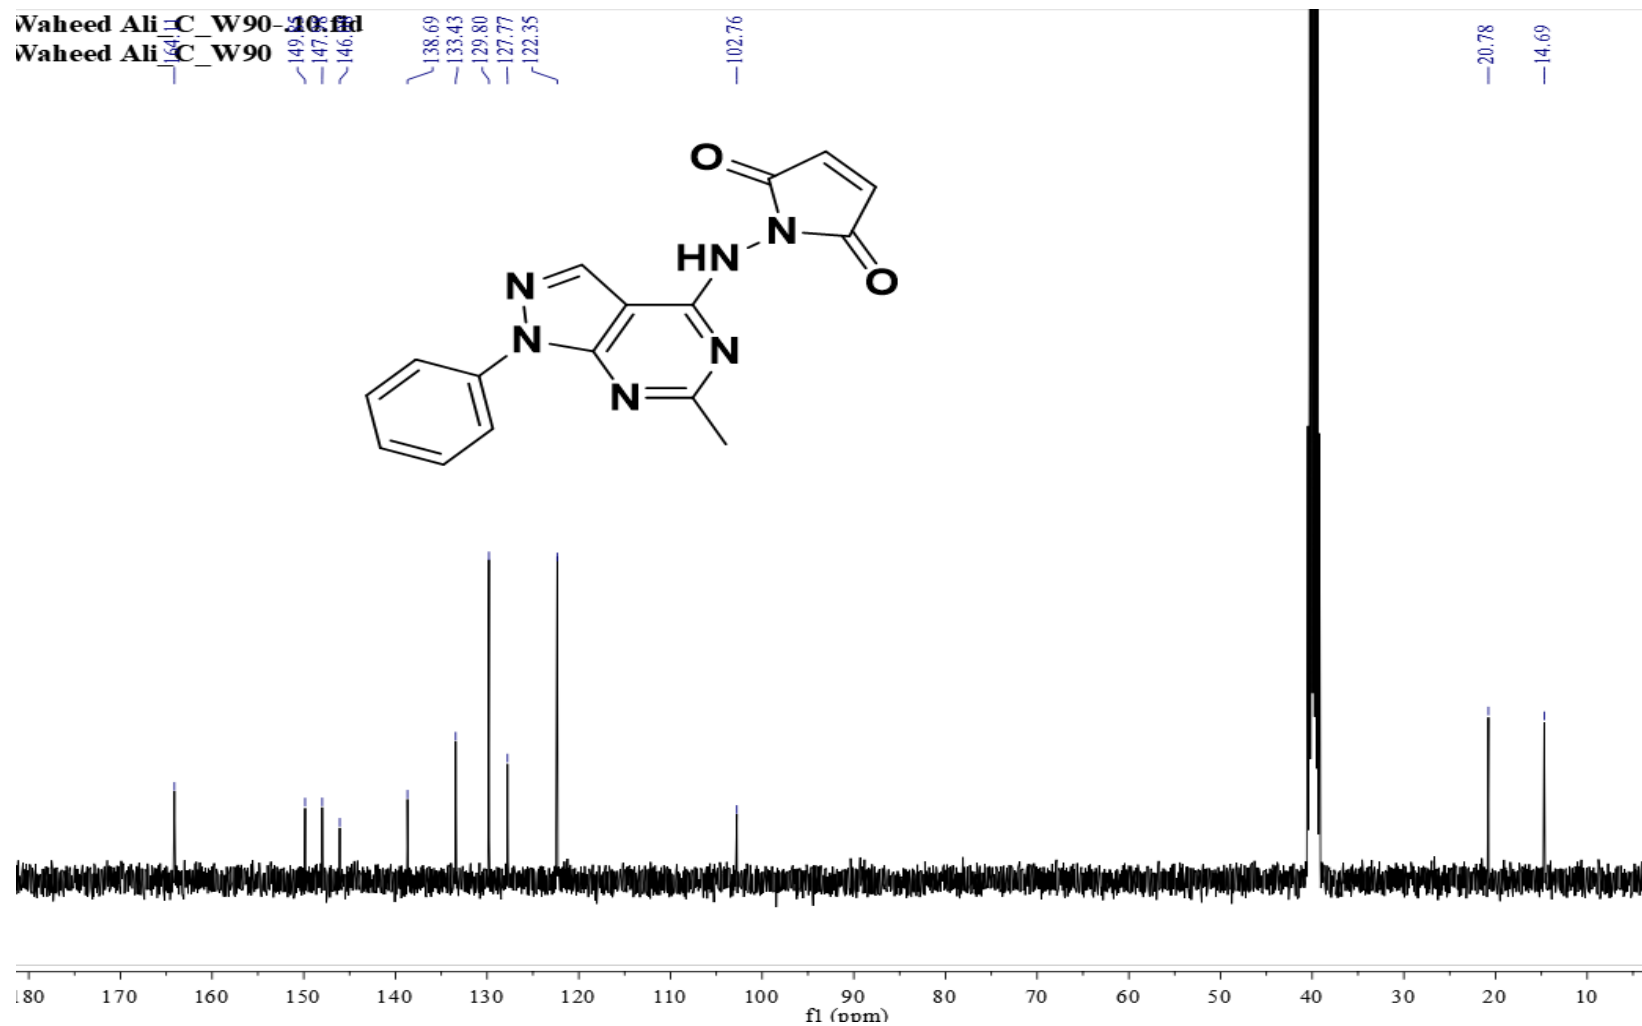

$^{13}\text{C}$  NMR of compound 8

wahed-ali-w90 #109 RT: 1.84 AV: 1 SB: 2 4.45 , 4.45 NL: 6.10E2  
T: {0,0} + c EI Full ms [40.00-1000.00]

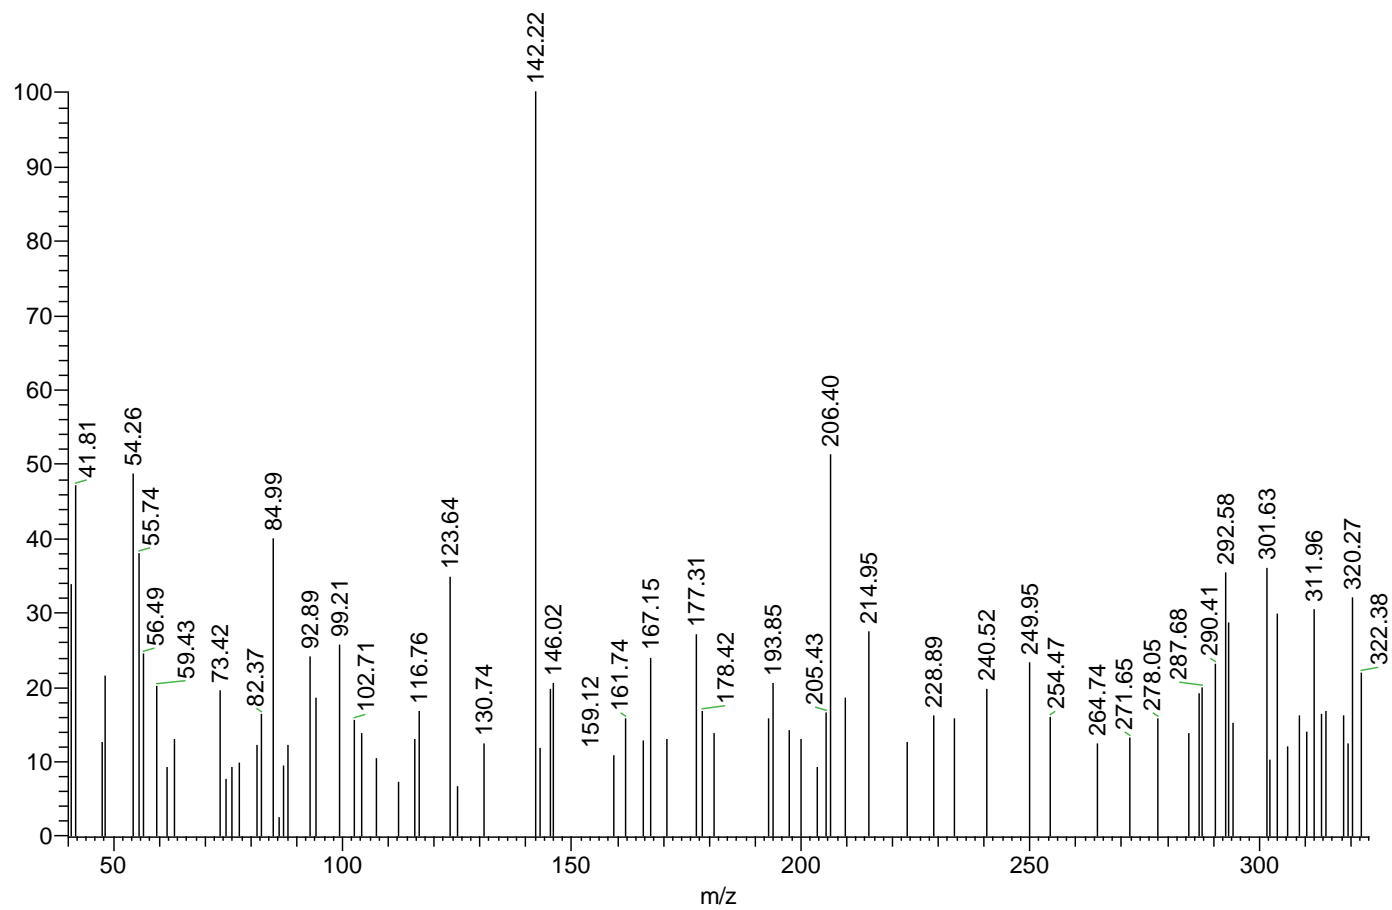

Mass of compound 8

Vaheed Ali\_H<sub>2</sub>SH.10.fid  
Vaheed Ali\_H<sub>2</sub>SH

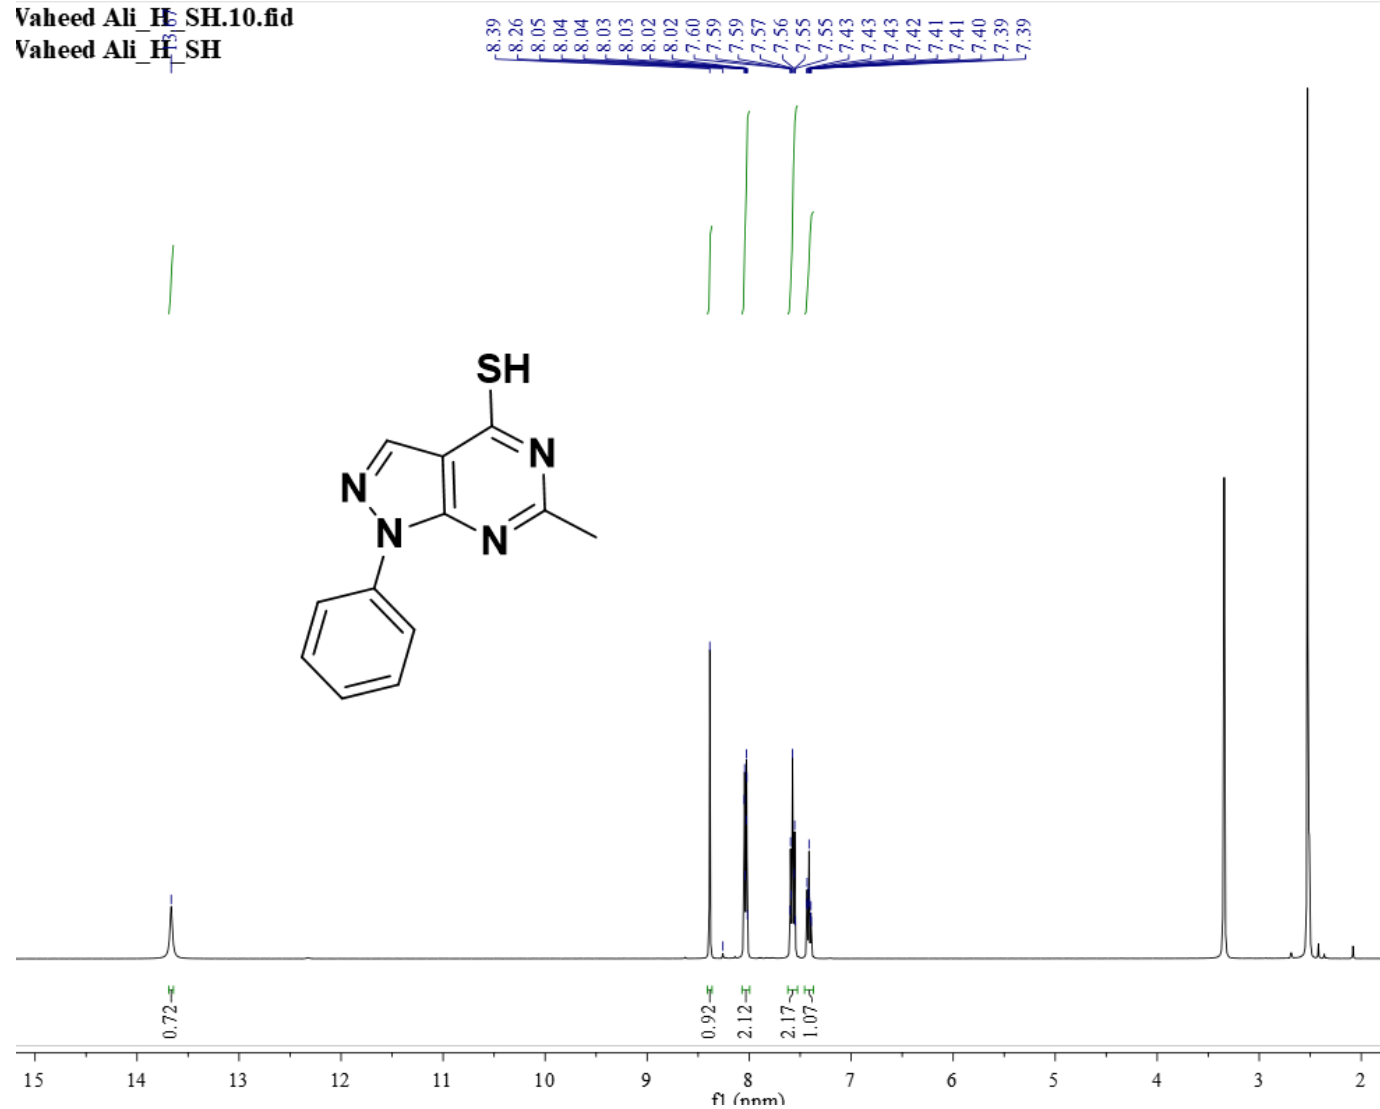

<sup>1</sup>H NMR of compound 9



wahed-ali-sh #109 RT: 1.84 AV: 1 SB: 2 4.45 , 4.45 NL: 5.48E3  
T: {0,0} + c EI Full ms [40.00-1000.00]

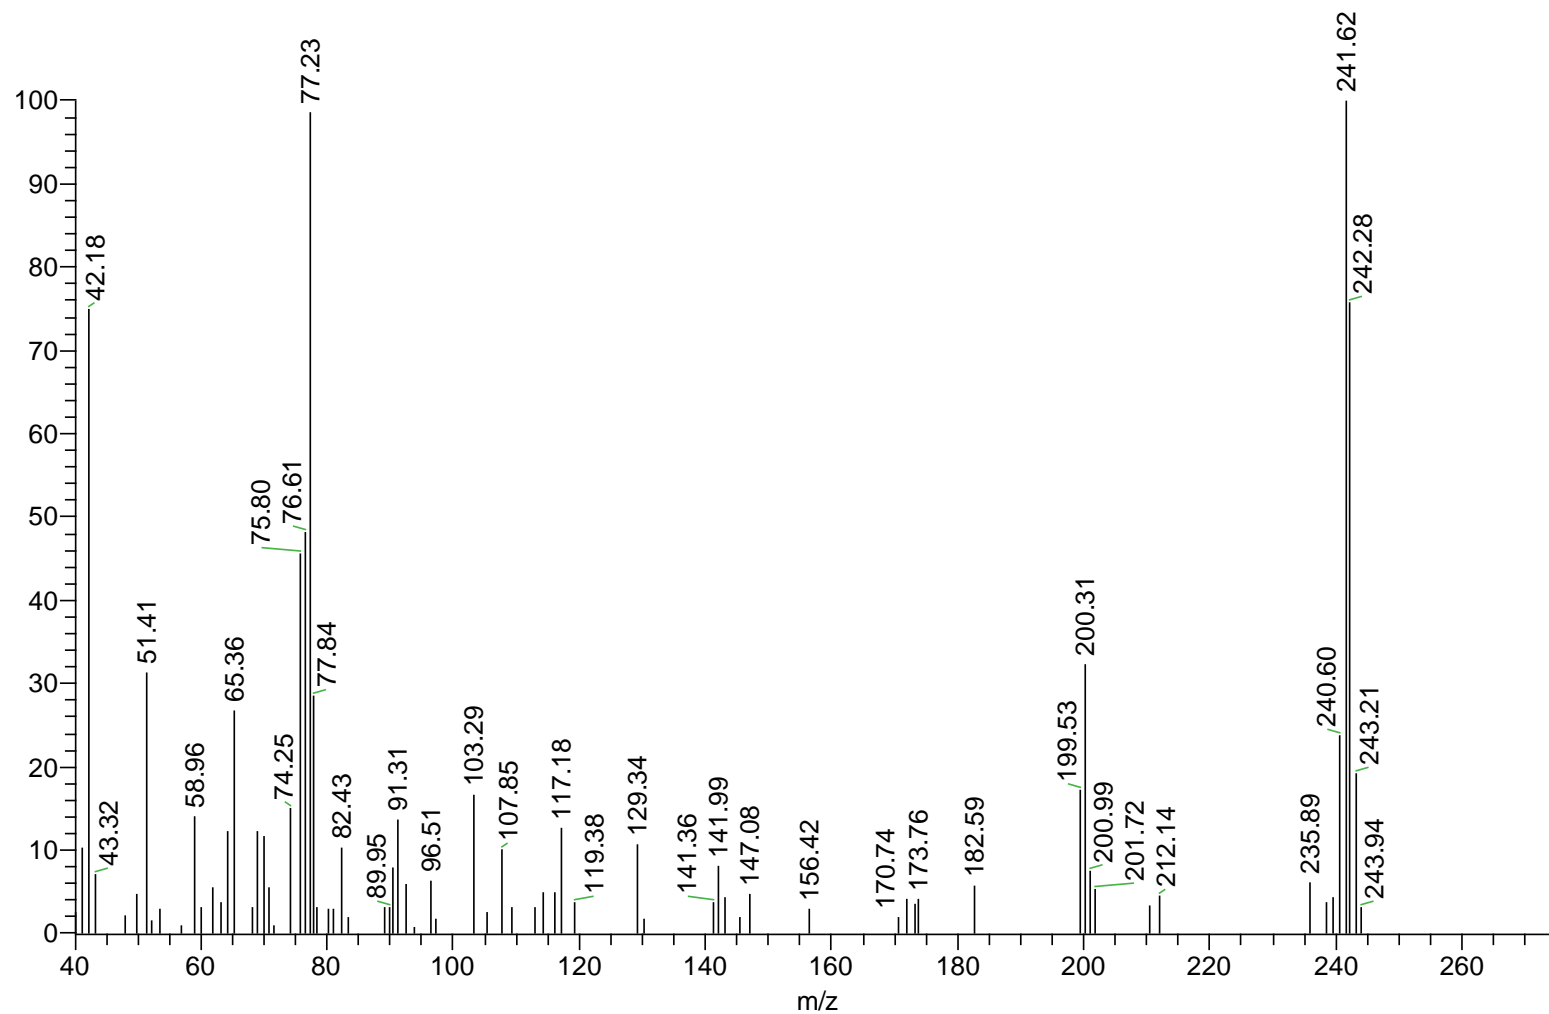

Mass of compound 9

Waheed Ali\_H\_W34

Microanalytical Unit - FOPCU - NMR laboratory  
www.pharma.cu.edu.eg dir-mau.fopcu@pharma.cu.edu.eg

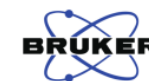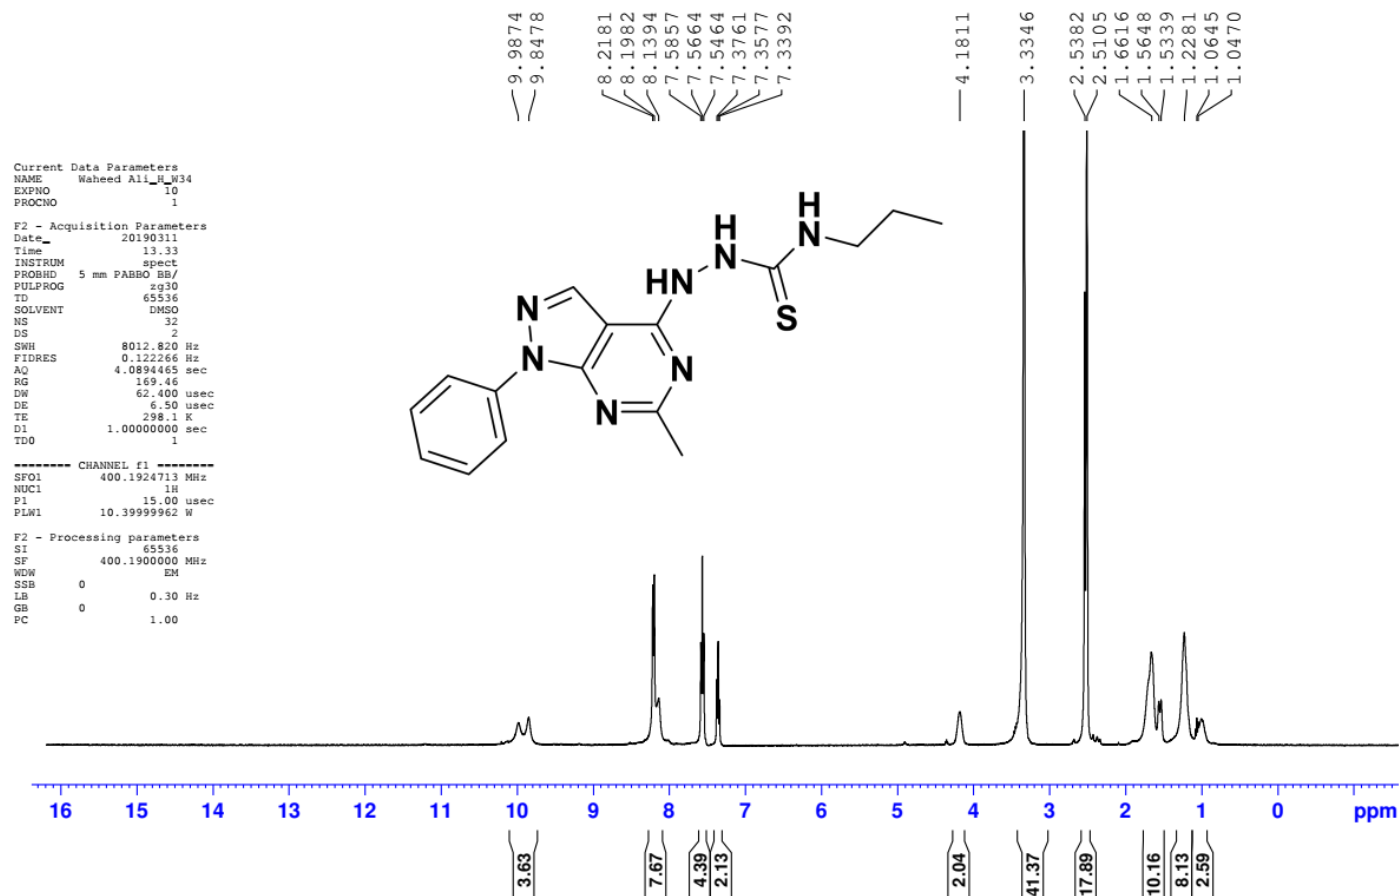

<sup>1</sup>H NMR of compound 9b

Waheed Ali\_H\_W47.10.fid  
Waheed Ali\_H\_W47

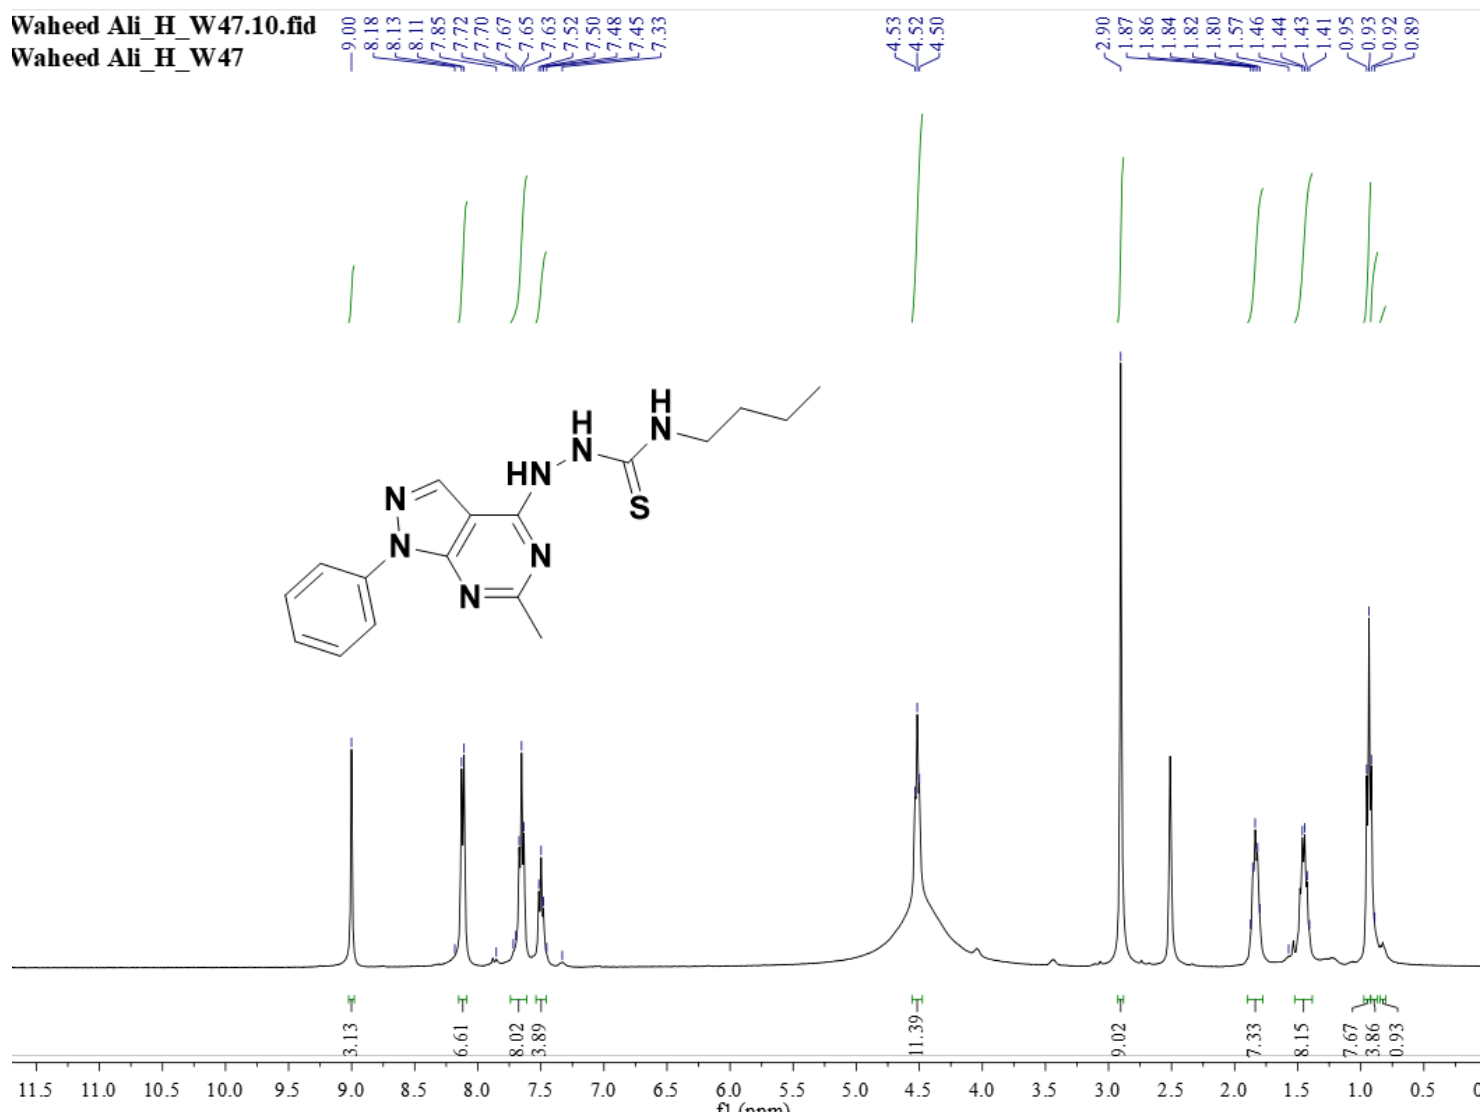

$^1\text{H}$  NMR of compound 9c

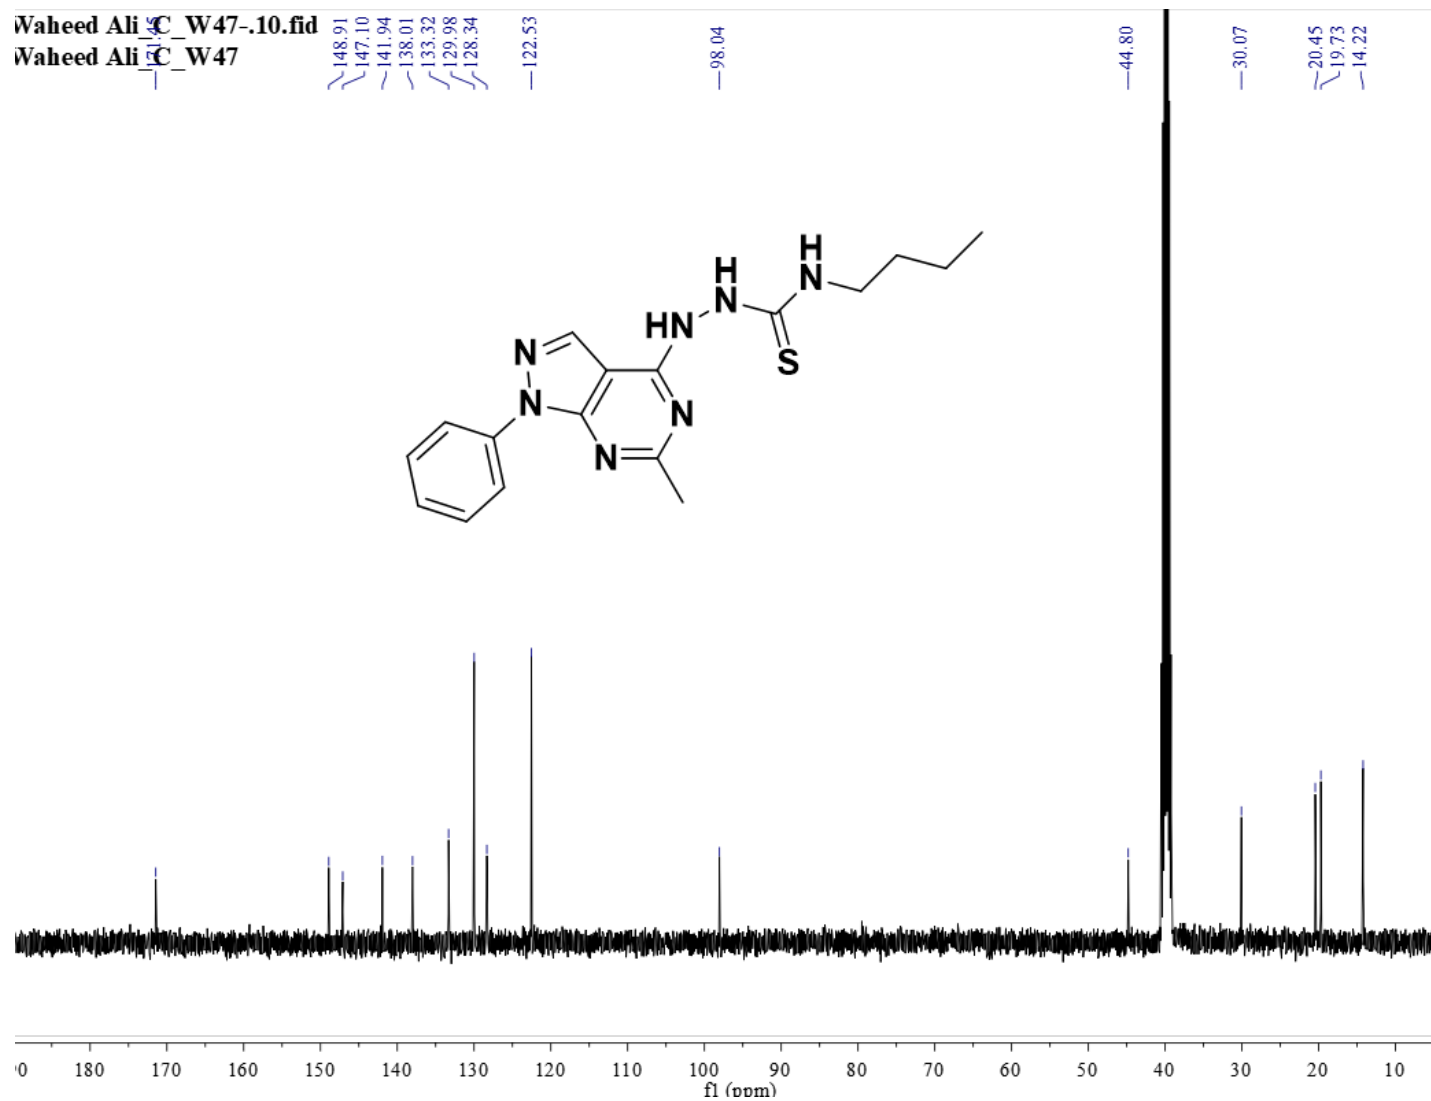

<sup>13</sup>C NMR of compound 9c

wahed-ali-w47 #559 RT: 9.37 AV: 1 SB: 2 4.45, 4.45 NL: 4.24E2  
T: {0,0} + c EI Full ms [40.00-1000.00]

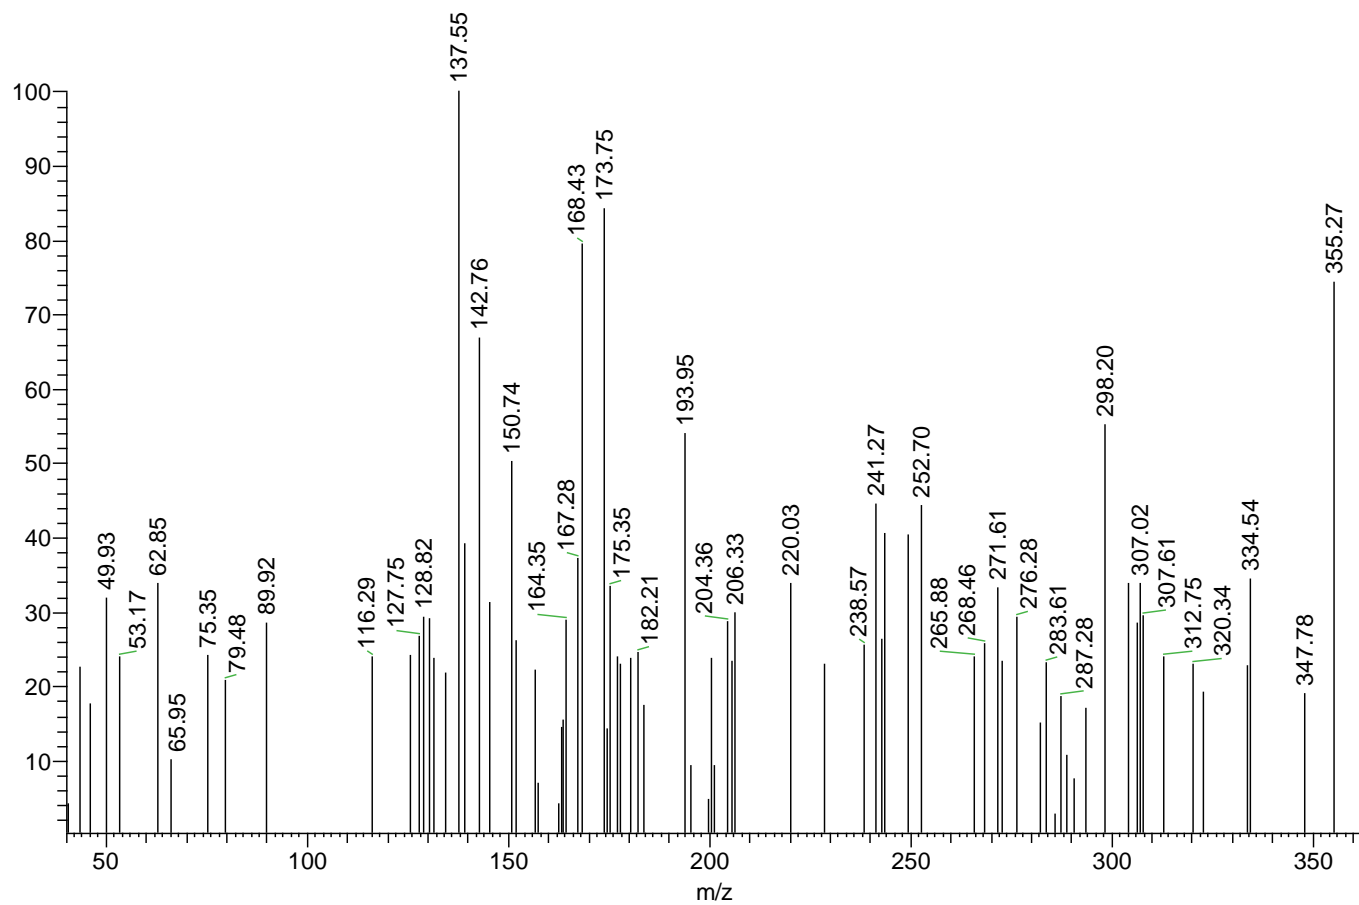

Mass of compound 9c

Waheed Ali\_H\_W49.10.fid  
Waheed Ali\_H\_W49

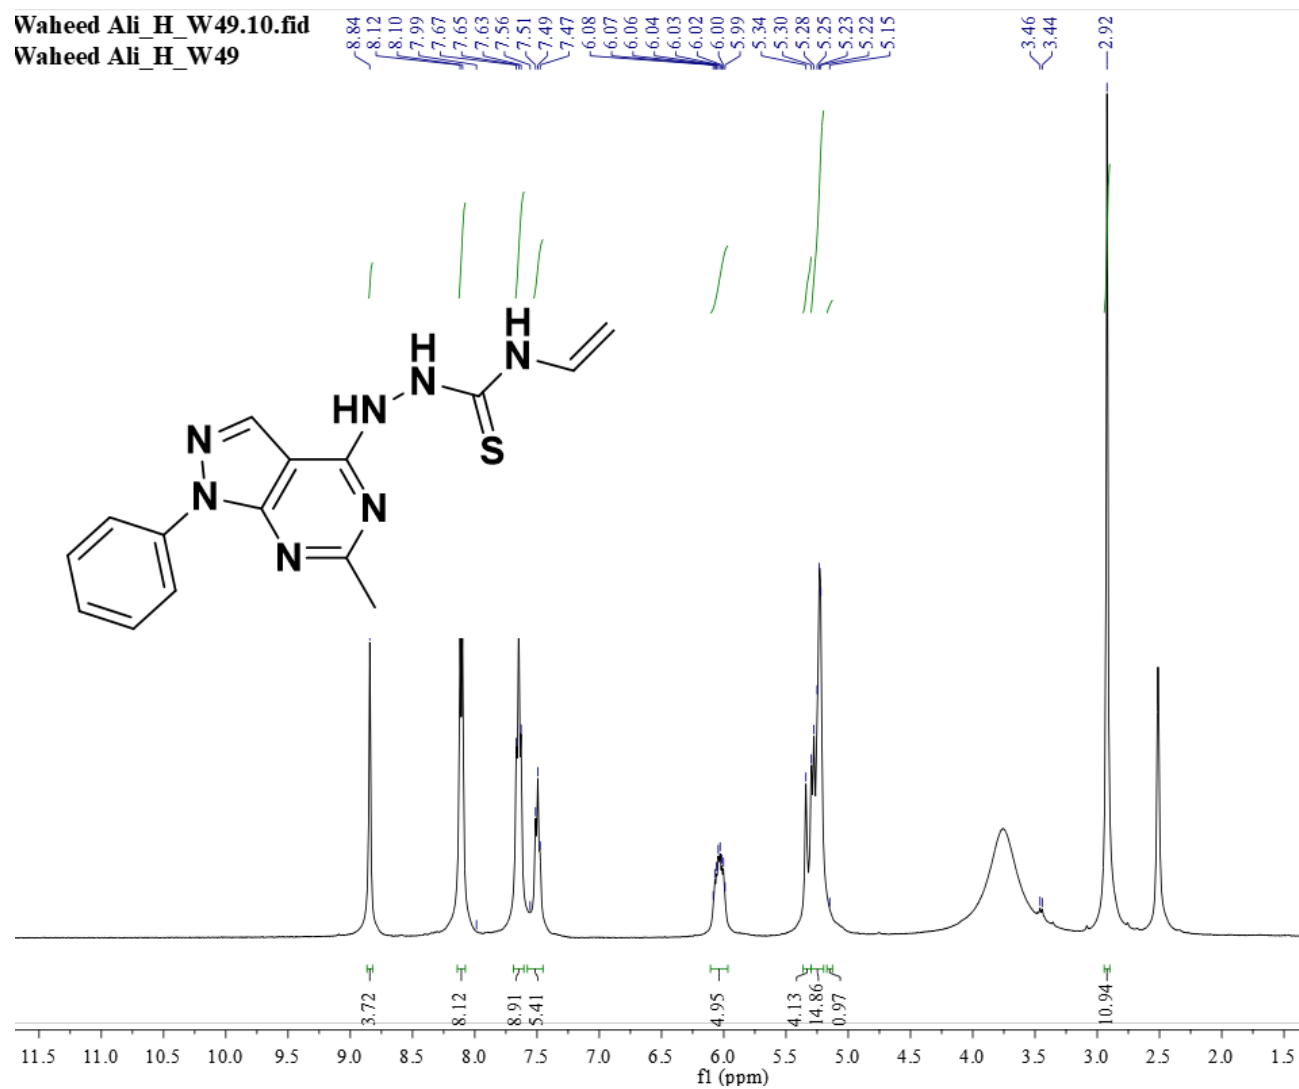

$^1\text{H}$  NMR of compound 9d

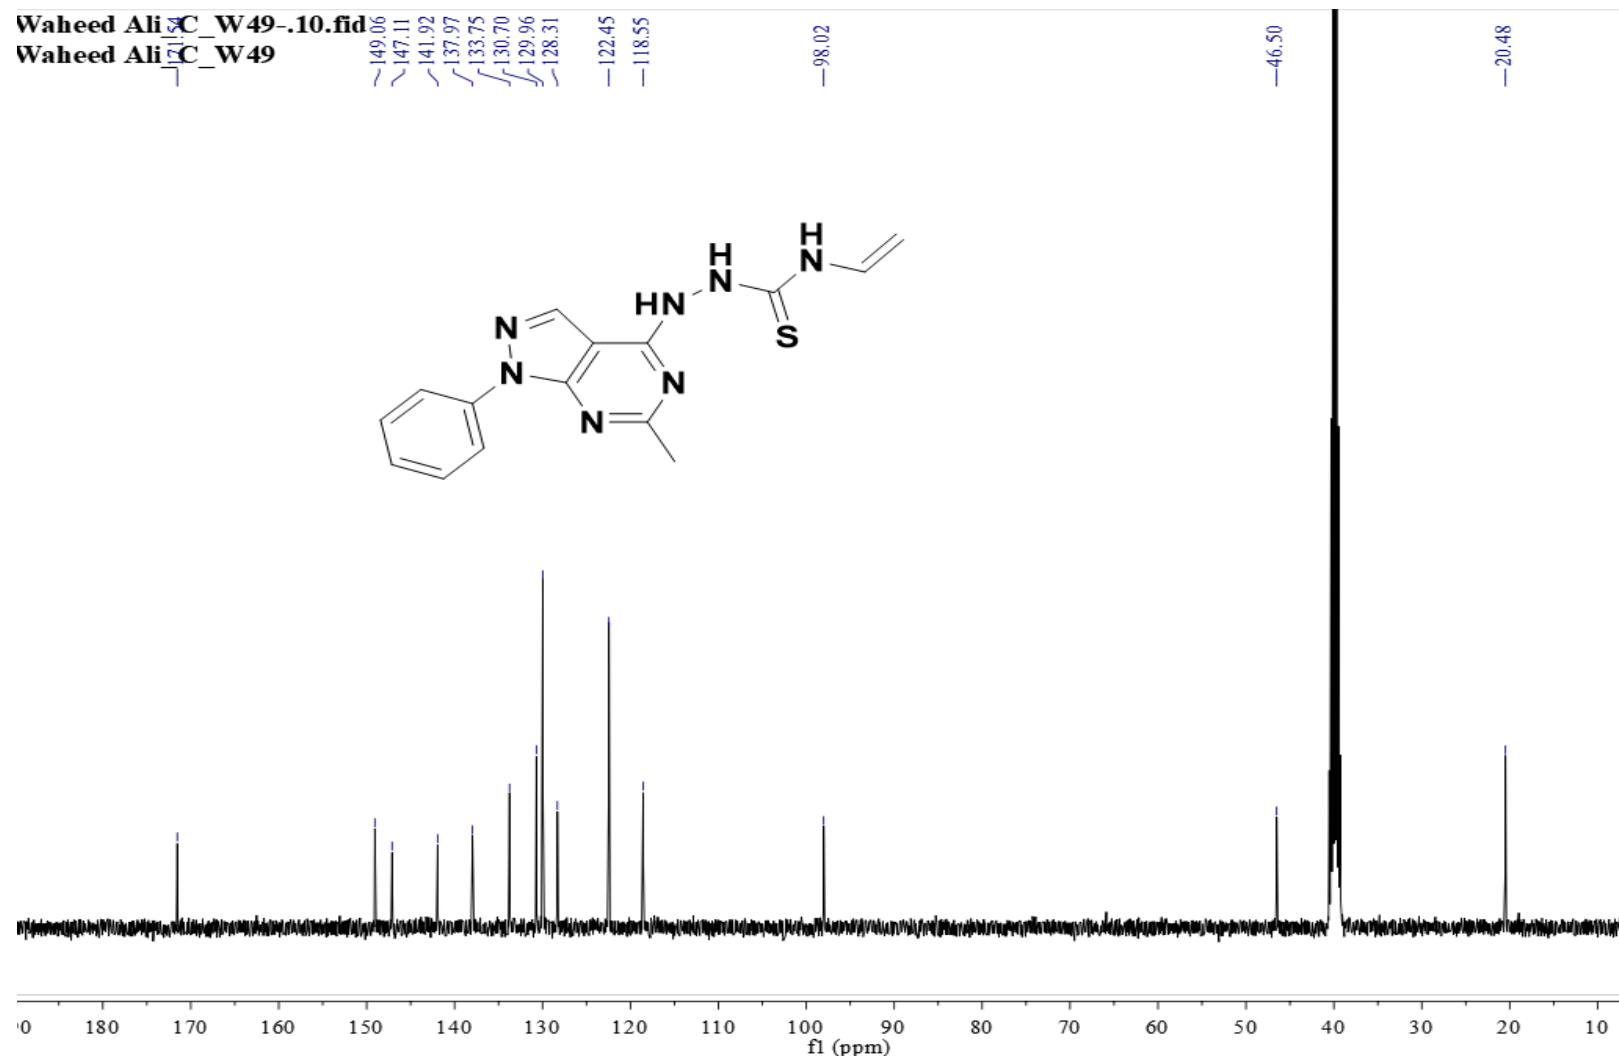

<sup>13</sup>C NMR of compound 9d

wahed-ali-w49 #159 RT: 2.68 AV: 1 SB: 2 4.45 , 4.45 NL: 1.79E3  
T: {0,0} + c EI Full ms [40.00-1000.00]

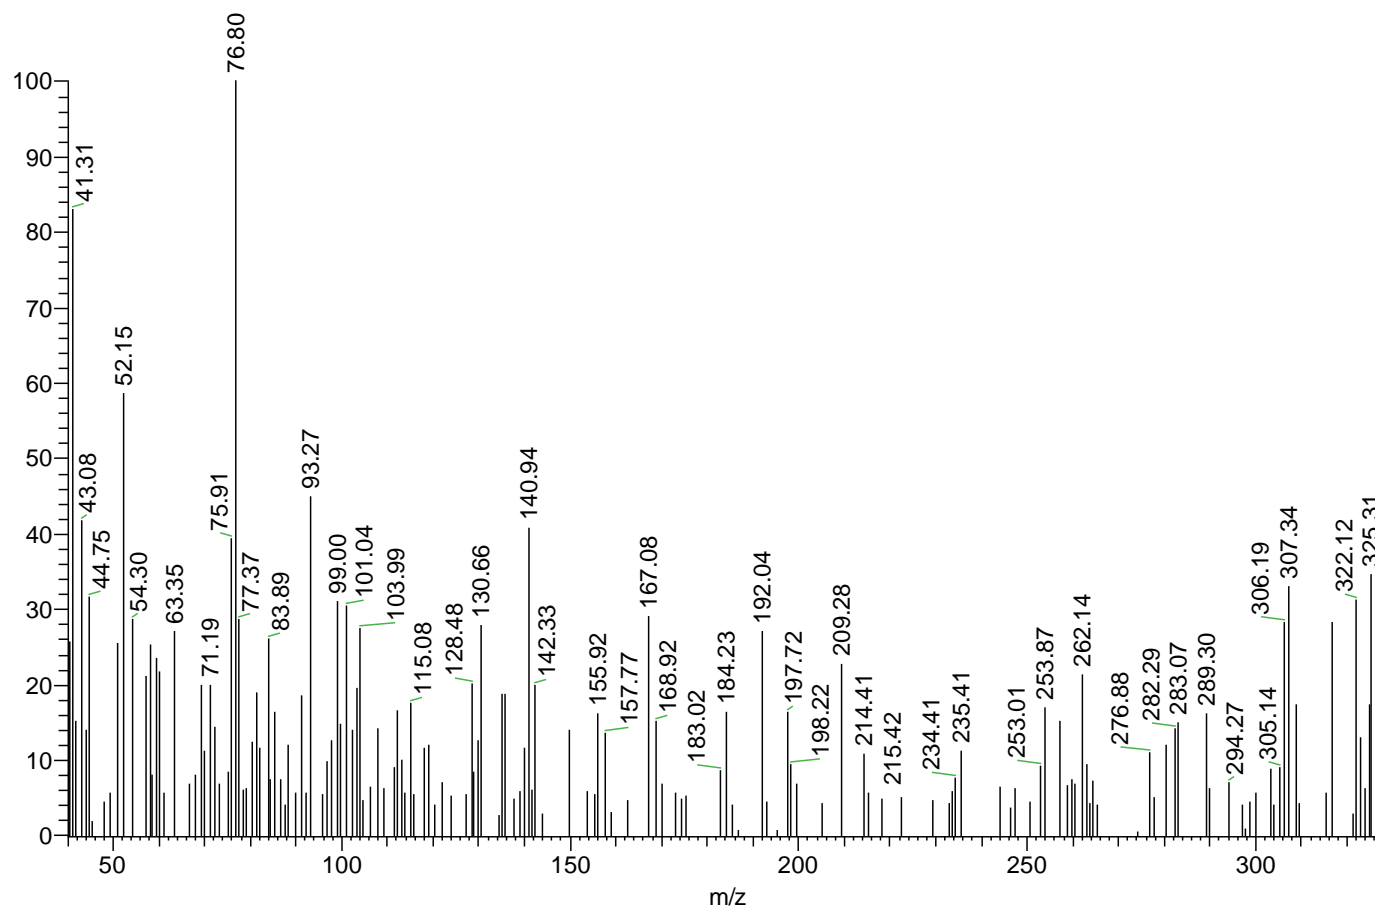

Mass of compound 9d



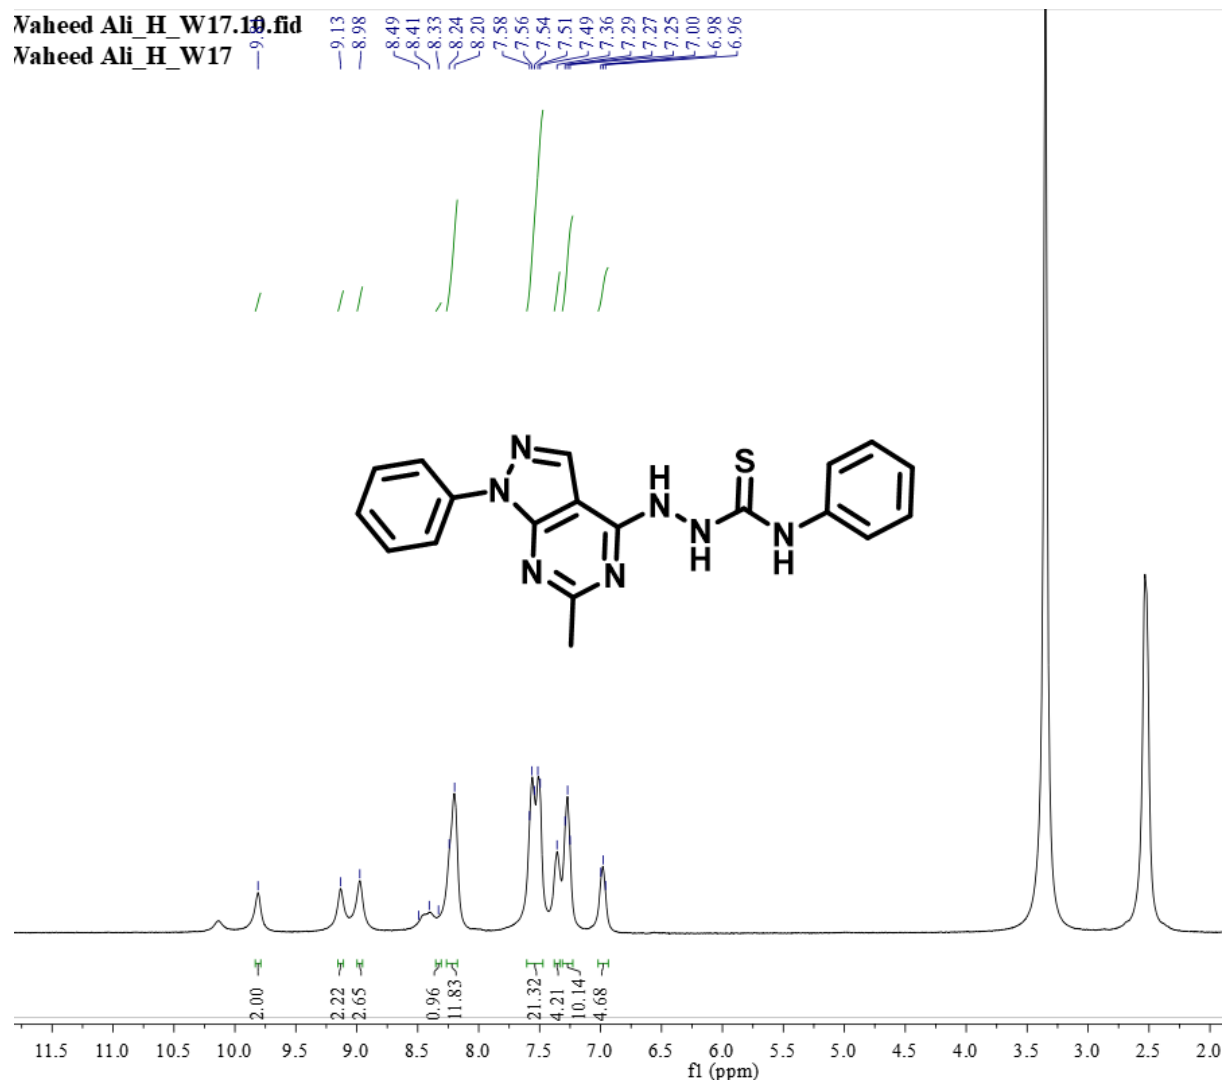

$^1\text{H}$  NMR of compound 9e

Waheed Ali\_C\_W17.10.fid  
Waheed Ali\_C\_W17

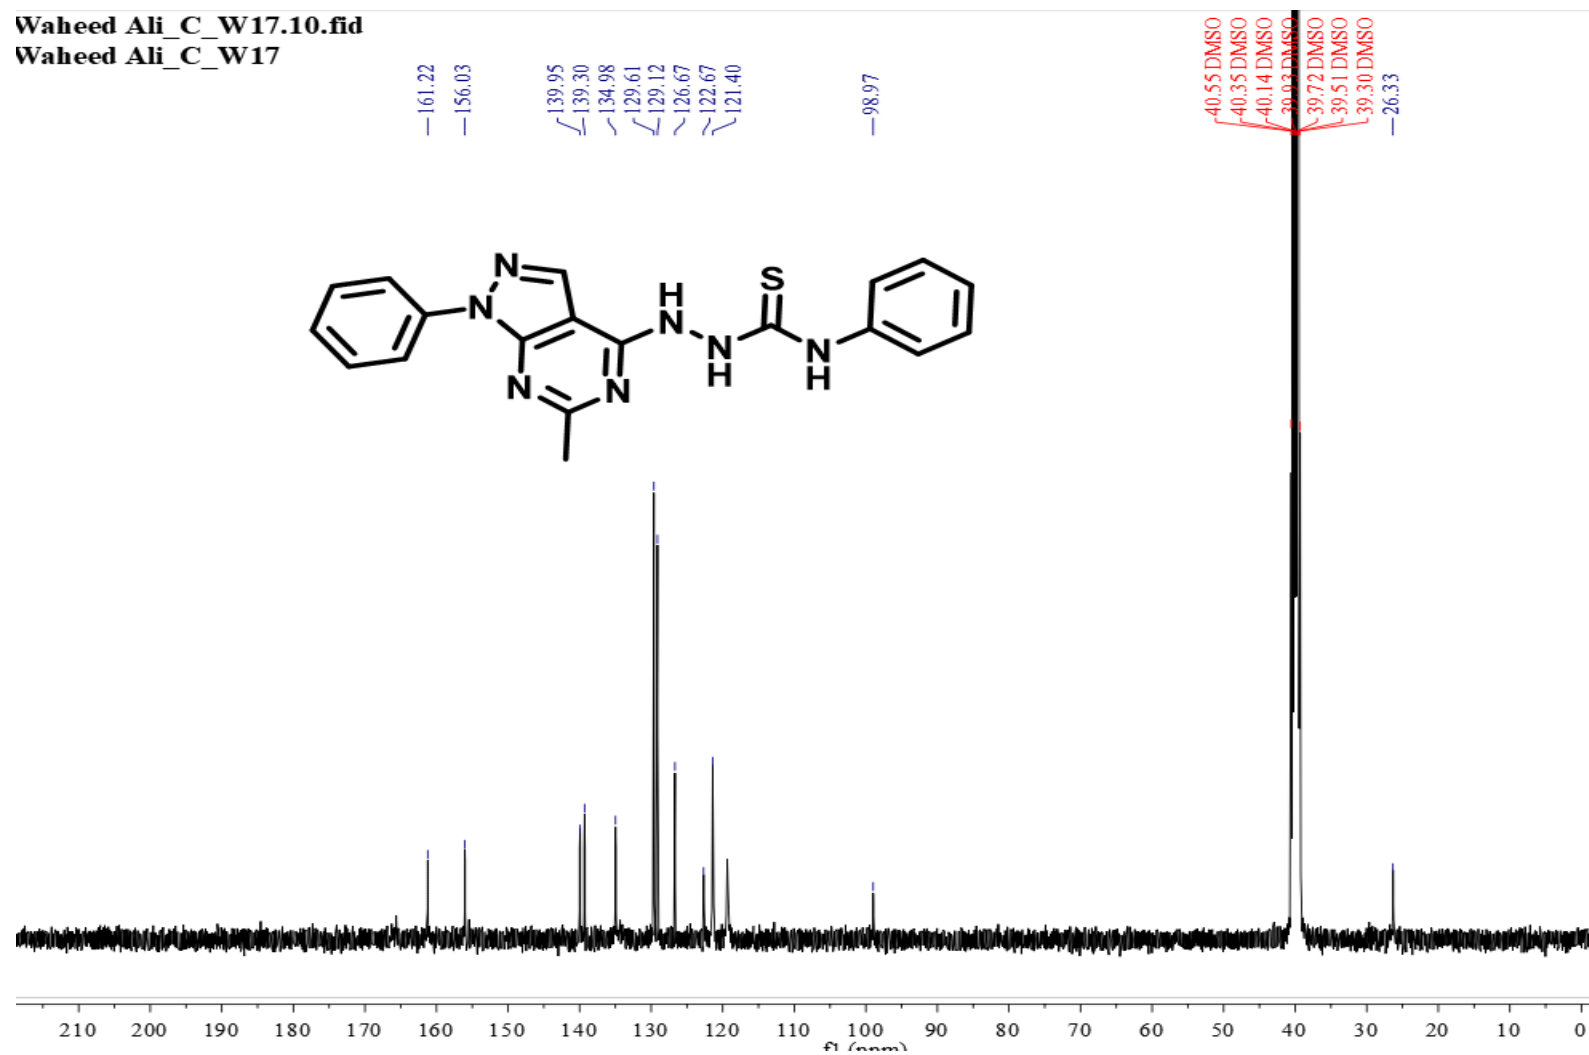

<sup>13</sup>C of Compound 9e

wahed-ali-w17 #202 RT: 3.40 AV: 1 SB: 2 4.45 , 4.45 NL: 7.09E2  
T: {0,0} + c EI Full ms [40.00-1000.00]

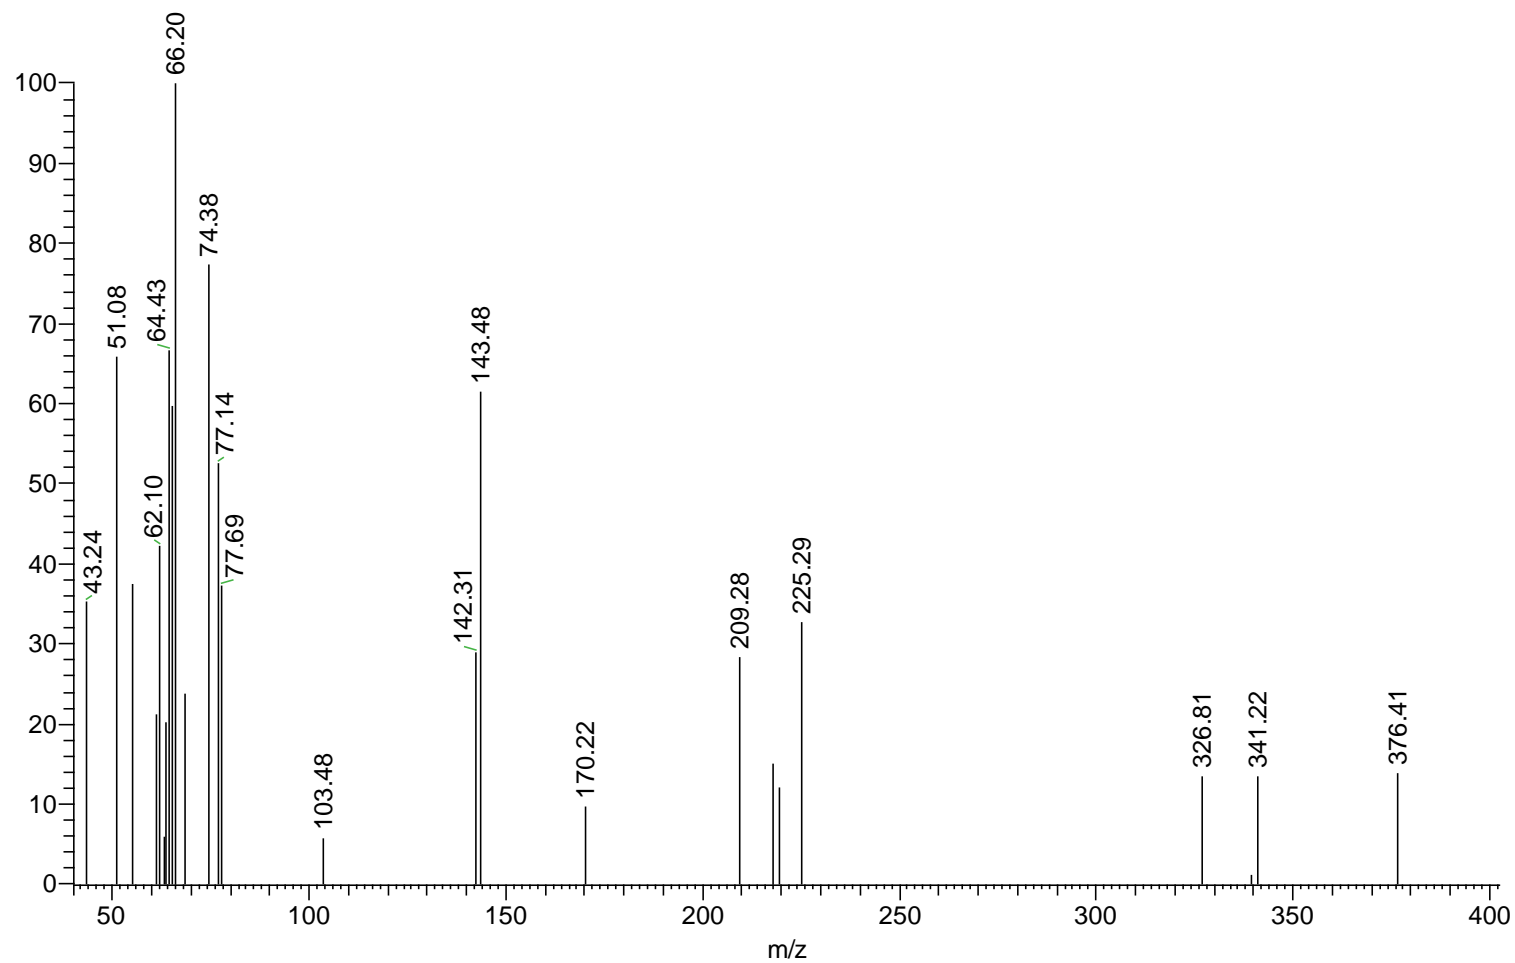

Mass of Compound 9e

# SAMPLE INFORMATION

|                   |                           |                     |                                           |
|-------------------|---------------------------|---------------------|-------------------------------------------|
| Sample Name:      | W-17                      | Acquired By:        | System                                    |
| Sample Type:      | Unknown                   | Sample Set Name:    | errere                                    |
| Vial:             | 7                         | Acq. Method Set:    | FTANInstrument                            |
| Injection #:      | 1                         | Processing Method:  | Default                                   |
| Injection Volume: | 10.00 µl                  | Channel Name:       | 210.0nm                                   |
| Run Time:         | 26.0 Minutes              | Proc. Chnl. Descr.: | 996 FDA.210.0 nm(FDA.210.0 to 800.0 nm)at |
| Date Acquired:    | 9/23/2023 7:42:44 PM EST  |                     |                                           |
| Date Processed:   | 9/24/2023 10:42:39 AM EST |                     |                                           |

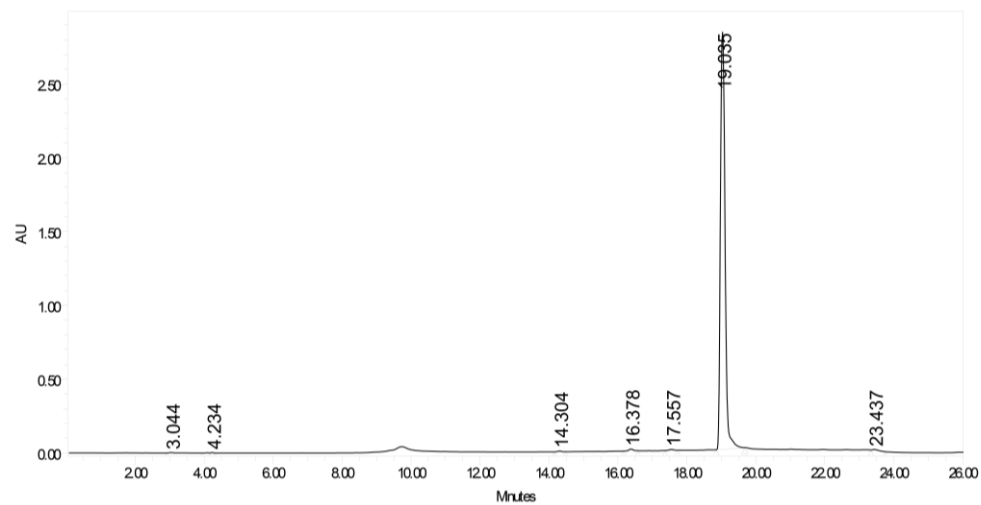

|   | RT     | Area     | %Area | Hight   |
|---|--------|----------|-------|---------|
| 1 | 3.044  | 27972    | 0.10  | 2849    |
| 2 | 4.234  | 12902    | 0.05  | 3523    |
| 3 | 14.304 | 35493    | 0.13  | 4965    |
| 4 | 16.378 | 109738   | 0.41  | 12316   |
| 5 | 17.557 | 55735    | 0.21  | 6178    |
| 6 | 19.035 | 26364698 | 98.84 | 2830357 |
| 7 | 23.437 | 67141    | 0.25  | 6002    |

## HPLC of Compound 9e

Researcher : Dr.Hany Emary email: [jan\\_25\\_misr@yahoo.com](mailto:jan_25_misr@yahoo.com) mob.+966534391522  
 Assay : EGFR inh.assay  
 Samples : 03 compounds  
 Cell lines : ---  
 Ref. : ---  
 Date : 30-12-2021  
 Reader : Tecan Spark Reader  
 Kit used : ---.  
 Solvent : DMSO

## Lab Report

| ser | Compound  |             | EGFR          |         |
|-----|-----------|-------------|---------------|---------|
|     | code      | MW<br>g/mol | IC50<br>ug/ml | SD<br>± |
| 1   | 5i        |             | 0.064         | 0.004   |
| 2   | 5b        |             | 0.126         | 0.008   |
| 3   | 9e        |             | 0.289         | 0.018   |
| *** | Erlotinib |             | 0.052         | 0.003   |

Detailed Results

|                                                                                     |      |      |     |      |    |    |    |       |      |       |         |            |
|-------------------------------------------------------------------------------------|------|------|-----|------|----|----|----|-------|------|-------|---------|------------|
| EGFR                                                                                |      |      |     |      |    |    |    |       |      |       |         |            |
| code                                                                                | IC50 | conc | log | %inh | T2 | T1 | ΔT | RFU2  | RFU1 | ΔRFU  | slope   | K.Activity |
| 5i                                                                                  |      | 10   | 1   | 88   | 30 | 0  | 30 | 11.55 | 0    | 11.55 | 3.33333 | 13.86001   |
|    |      | 1    | 0   | 73   | 30 | 0  | 30 | 26.51 | 0    | 26.51 | 3.33333 | 31.81203   |
|                                                                                     |      | 0.1  | -1  | 52   | 30 | 0  | 30 | 47.82 | 0    | 47.82 | 3.33333 | 57.38406   |
|                                                                                     |      | 0.01 | -2  | 36   | 30 | 0  | 30 | 64.35 | 0    | 64.35 | 3.33333 | 77.22008   |
|                                                                                     | EC   |      |     | 0    | 30 | 0  | 30 | 100   | 0    | 100   | 3.33333 | 120        |
| code                                                                                | IC50 | conc | log | %inh | T2 | T1 | ΔT | RFU2  | RFU1 | ΔRFU  | slope   | K.Activity |
| 5b                                                                                  |      | 10   | 1   | 87   | 30 | 0  | 30 | 13.05 | 0    | 13.05 | 3.33333 | 15.66002   |
|    |      | 1    | 0   | 71   | 30 | 0  | 30 | 28.92 | 0    | 28.92 | 3.33333 | 34.70403   |
|                                                                                     |      | 0.1  | -1  | 46   | 30 | 0  | 30 | 54.36 | 0    | 54.36 | 3.33333 | 65.23207   |
|                                                                                     |      | 0.01 | -2  | 28   | 30 | 0  | 30 | 71.51 | 0    | 71.51 | 3.33333 | 85.81209   |
|                                                                                     | EC   |      |     | 0    | 30 | 0  | 30 | 100   | 0    | 100   | 3.33333 | 120        |
| code                                                                                | IC50 | conc | log | %inh | T2 | T1 | ΔT | RFU2  | RFU1 | ΔRFU  | slope   | K.Activity |
| 9e                                                                                  |      | 10   | 1   | 83   | 30 | 0  | 30 | 16.81 | 0    | 16.81 | 3.33333 | 20.17202   |
|   |      | 1    | 0   | 58   | 30 | 0  | 30 | 42.31 | 0    | 42.31 | 3.33333 | 50.77205   |
|                                                                                     |      | 0.1  | -1  | 42   | 30 | 0  | 30 | 57.84 | 0    | 57.84 | 3.33333 | 69.40807   |
|                                                                                     |      | 0.01 | -2  | 20   | 30 | 0  | 30 | 79.82 | 0    | 79.82 | 3.33333 | 95.7841    |
|                                                                                     | EC   |      |     | 0    | 30 | 0  | 30 | 100   | 0    | 100   | 3.33333 | 120        |
| code                                                                                | IC50 | conc | log | %inh | T2 | T1 | ΔT | RFU2  | RFU1 | ΔRFU  | slope   | K.Activity |
| Erlotinib                                                                           |      | 10   | 1   | 92   | 30 | 0  | 30 | 8.35  | 0    | 8.35  | 3.33333 | 10.02001   |
|  |      | 1    | 0   | 81   | 30 | 0  | 30 | 19.16 | 0    | 19.16 | 3.33333 | 22.99202   |
|                                                                                     |      | 0.1  | -1  | 56   | 30 | 0  | 30 | 44.39 | 0    | 44.39 | 3.33333 | 53.26805   |
|                                                                                     |      | 0.01 | -2  | 34   | 30 | 0  | 30 | 66.36 | 0    | 66.36 | 3.33333 | 79.63208   |
|                                                                                     | EC   |      |     | 0    | 30 | 0  | 30 | 100   | 0    | 100   | 3.33333 | 120        |

**Researcher** : Dr.Hany Emary email: [jan\\_25\\_misr@yahoo.com](mailto:jan_25_misr@yahoo.com) mob. +201032706127  
**Assay** : EGFR-T490M kinase assay  
**Samples** : 04 compounds ( ) .  
**Cell lines** : ---  
**Ref.** : ----  
**Date** : 015-09-2022  
**Reader** : Tecan-spark reader  
**Kit used** : BPS bioscience EGFR assay kit.  
**Solvent** : DMSO

## Lab Report

| Ser | Sample    |              | EGFR<br>IC50<br>uM | SD    |
|-----|-----------|--------------|--------------------|-------|
|     | code      | M.W<br>g/mol | T790M              |       |
| 1   | 5b        | 344          | 1.93               | 0.08  |
| 2   | 5i        | 342          | 0.56               | 0.04  |
| *** | Erlotenib | 393.436      | 0.035              | 0.001 |

## Detailed results

| code                                                                               | IC50 | conc       | log      | %inh | T2 | T1 | ΔT | RFU2  | RFU1 | ΔRFU  | slope | K.Activity |
|------------------------------------------------------------------------------------|------|------------|----------|------|----|----|----|-------|------|-------|-------|------------|
| 5b                                                                                 |      | 10         | 1        | 87   | 30 | 0  | 30 | 13.04 | 0    | 13.04 | 3.333 | 15.648     |
|                                                                                    |      | 1          | 0        | 77   | 30 | 0  | 30 | 22.51 | 0    | 22.51 | 3.333 | 27.012     |
|                                                                                    |      | 0.1        | -1       | 54   | 30 | 0  | 30 | 46.37 | 0    | 46.37 | 3.333 | 55.64401   |
|                                                                                    |      | 0.01       | -2       | 37   | 30 | 0  | 30 | 62.96 | 0    | 62.96 | 3.333 | 75.55201   |
| EC                                                                                 |      |            |          | 0    | 30 | 0  | 30 | 100   | 0    | 100   | 3.333 | 120        |
|                                                                                    |      |            |          |      |    |    |    |       |      |       |       |            |
| code                                                                               | IC50 | conc.ng/ml | log conc | %inh | T2 | T1 | ΔT | RFU2  | RFU1 | ΔRFU  | slope | K.Activity |
| 5i                                                                                 |      | 10         | 1        | 89   | 30 | 0  | 30 | 11.07 | 0    | 11.07 | 3.333 | 13.284     |
|                                                                                    |      | 1          | 0        | 76   | 30 | 0  | 30 | 24.04 | 0    | 24.04 | 3.333 | 28.848     |
|                                                                                    |      | 0.1        | -1       | 50   | 30 | 0  | 30 | 49.76 | 0    | 49.76 | 3.333 | 59.71201   |
|                                                                                    |      | 0.01       | -2       | 37   | 30 | 0  | 30 | 63.28 | 0    | 63.28 | 3.333 | 75.93601   |
| EC                                                                                 |      |            |          | 0    | 30 | 0  | 30 | 100   | 0    | 100   | 3.333 | 120        |
|                                                                                    |      |            |          |      |    |    |    |       |      |       |       |            |
| code                                                                               | IC50 | conc.ng/ml | log conc | %inh | T2 | T1 | ΔT | RFU2  | RFU1 | ΔRFU  | slope | K.Activity |
|  |      | 10         | 1        | 94   | 30 | 0  | 30 | 6.49  | 0    | 6.49  | 3.333 | 7.788001   |
|                                                                                    |      | 1          | 0        | 83   | 30 | 0  | 30 | 16.81 | 0    | 16.81 | 3.333 | 20.172     |
|                                                                                    |      | 0.1        | -1       | 61   | 30 | 0  | 30 | 38.76 | 0    | 38.76 | 3.333 | 46.512     |
|                                                                                    |      | 0.01       | -2       | 48   | 30 | 0  | 30 | 52.41 | 0    | 52.41 | 3.333 | 62.89201   |
| EC                                                                                 |      |            |          | 0    | 30 | 0  | 30 | 100   | 0    | 100   | 3.333 | 120        |



|            |                                  |                                                                                 |      |
|------------|----------------------------------|---------------------------------------------------------------------------------|------|
| Researcher | : Dr.Waheed Ali                  | email: <a href="mailto:dr.waheed202121@gmail.com">dr.waheed202121@gmail.com</a> | mob. |
| Assay      | : <b>TOPO IIB</b>                | <a href="mailto:dr_elseba3y80@outlook.com">dr_elseba3y80@outlook.com</a>        |      |
| Samples    | : 06 compounds                   |                                                                                 |      |
| Ref.       | : ---                            |                                                                                 |      |
| Date       | : 10-04-2021                     |                                                                                 |      |
| Reader     | : ---                            |                                                                                 |      |
| Cell line  | : ---                            |                                                                                 |      |
| Kit used   | : Human DNA Topoisomerase 2B Kit |                                                                                 |      |
| Solvent    | : DMSO                           |                                                                                 |      |

## Lab.Report

| ser | Compound  |    |            | TOP2a         | SD<br>± |
|-----|-----------|----|------------|---------------|---------|
|     |           |    |            | IC50<br>ug/ml |         |
|     | code      | MW | conc<br>ug |               |         |
| 1   | W3        |    |            | 6.21          | 0.37    |
| 2   | 5b        |    |            | 37.3          | 2.2     |
| 3   | 5i        |    |            | 8.46          | 0.5     |
| 4   | W10       |    |            | 5.38          | 0.32    |
| 5   | W11       |    |            | 89.5          | 5.26    |
| 6   | 9e        |    |            | 9.24          | 0.54    |
| 7   | W35       |    |            | 60.5          | 3.56    |
| *** | Etoposide |    |            | 19.8          | 1.16    |

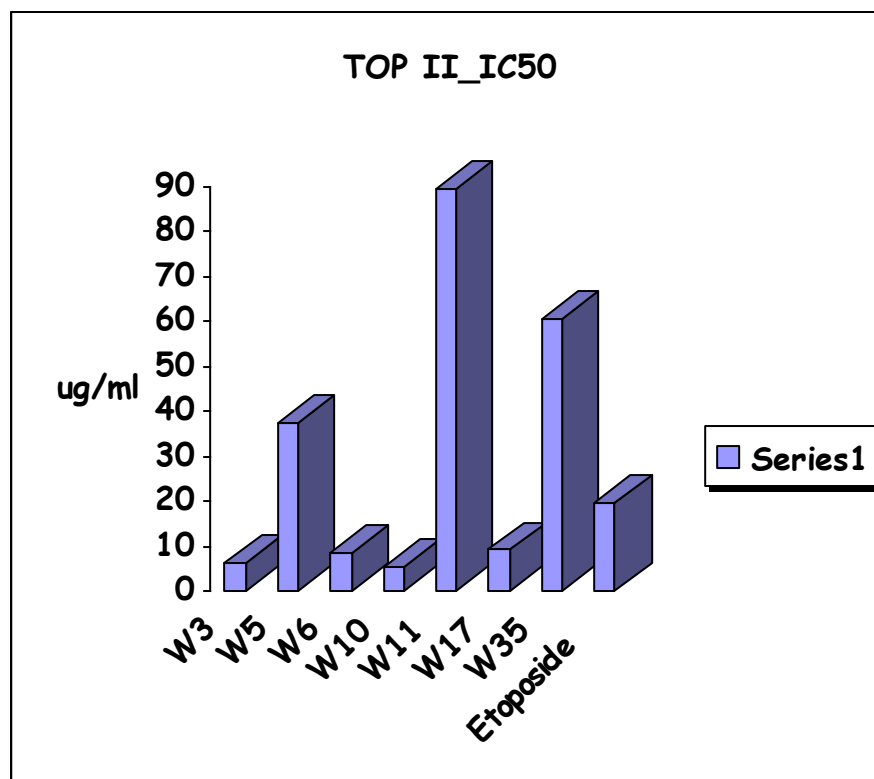

\_\_\_\_\_

| code | IC50 | conc | log | %inh |
|------|------|------|-----|------|
|------|------|------|-----|------|

A diagram of a simple room. On the left is a window with a blue curtain. To the right of the window is a door with a blue handle. Above the door is a small blue square. The room is enclosed by a black line representing the walls.

EC 0

\_\_\_\_\_

A diagram of a two-door box. The left door is open, revealing a light bulb and a switch. The right door is closed and has a blue plus sign on it. The box is labeled 'P1' in the top left corner.

|    |   |
|----|---|
| EC | 0 |
|----|---|

\_\_\_\_\_

EC 0

\_\_\_\_\_

A diagram of a simple room. On the left, there is a window with a blue cross symbol. On the right, there is a door with a blue cross symbol. The room is enclosed by a black border.

EC 0

\_\_\_\_\_

|    |   |
|----|---|
| EC | 0 |
|----|---|

\_\_\_\_\_

| TOPO II |   |     |    | W3 |     |    |   | W5  |    |   |     | W6 |   |     |    | W10 |     |    |   | W11 |    |   |     | W17 |   |     |    | W35 |     |    |   | Etoposide |  |  |  |
|---------|---|-----|----|----|-----|----|---|-----|----|---|-----|----|---|-----|----|-----|-----|----|---|-----|----|---|-----|-----|---|-----|----|-----|-----|----|---|-----------|--|--|--|
| -       | + | 100 | 10 | 1  | 100 | 10 | 1 | 100 | 10 | 1 | 100 | 10 | 1 | 100 | 10 | 1   | 100 | 10 | 1 | 100 | 10 | 1 | 100 | 10  | 1 | 100 | 10 | 1   | 100 | 10 | 1 |           |  |  |  |
|         |   |     |    |    |     |    |   |     |    |   |     |    |   |     |    |     |     |    |   |     |    |   |     |     |   |     |    |     |     |    |   |           |  |  |  |

|                                                                                  |     |    |    |
|----------------------------------------------------------------------------------|-----|----|----|
| 9e                                                                               | 100 | 2  | 65 |
| 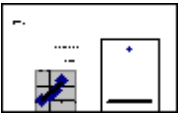 | 10  | 1  | 34 |
|                                                                                  | 1   | 0  | 16 |
|                                                                                  | 0.1 | -1 | 4  |
| EC                                                                               |     |    | 0  |

| code | IC50 | conc | log | %inh |
|------|------|------|-----|------|
| W35  | 100  | 2    |     | 60   |

|                                                                                   |     |    |     |
|-----------------------------------------------------------------------------------|-----|----|-----|
| 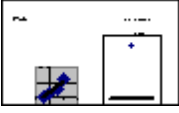 | 10  | 1  | 28  |
|                                                                                   | 1   | 0  | 15  |
|                                                                                   | 0.1 | -1 | 3.7 |
| EC                                                                                |     |    | 0   |

| code      | IC50 | conc | log | %inh |
|-----------|------|------|-----|------|
| Etoposide | 100  | 2    |     | 69   |

|                                                                                   |      |    |     |
|-----------------------------------------------------------------------------------|------|----|-----|
| 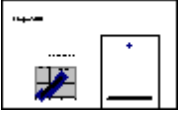 | 50   | 1  | 39  |
|                                                                                   | 25   | 0  | 20  |
|                                                                                   | 12.5 | -1 | 7.5 |
| EC                                                                                |      |    | 0   |

|                                                                                     |                        |
|-------------------------------------------------------------------------------------|------------------------|
| <b>W3</b>                                                                           | $y = 18.811x + 35.077$ |
| <b>W5</b>                                                                           | $y = 19.773x + 18.914$ |
| <b>W6</b>                                                                           | $y = 20.71x + 30.794$  |
| <b>W10</b>                                                                          | $y = 22.97x + 33.219$  |
| <b>W11</b>                                                                          | $y = 17.906x + 15.05$  |
| <b>W17</b>                                                                          | $y = 20.21x + 19.598$  |
| <b>W35</b>                                                                          | $y = 18.267x + 17.457$ |
| <b>Etoposide</b>                                                                    | $y = 20.241x + 23.76$  |
| 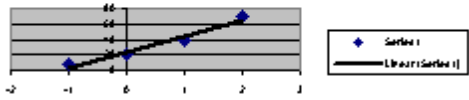 |                        |

Researcher : Dr.Waheed Ali email: [dr.waheed202121@gmail.com](mailto:dr.waheed202121@gmail.com) mob.  
 Assay : VEGFR2 enzyme assay  
 Samples : 07 compounds.  
 Cell line : ---  
 Reference : ---  
 Date : 10/04/2021  
 Kit used : ---  
 Reader : Tecan –spark reader BIOLINE ELISA READER wl 450 nm  
 Solvent : DMSO  
 Assay samples : ---

## Lab Report

| ser | Compound  |             | Results                 | SD<br>± |
|-----|-----------|-------------|-------------------------|---------|
|     | code      | MW<br>g/mol | VEGFR2<br>IC50<br>ug/ml |         |
| 1   | W3        |             | 0.26                    | 0.02    |
| 2   | 5b        |             | 5.42                    | 0.32    |
| 3   | 5i        |             | 2.596                   | 0.15    |
| 4   | W10       |             | 0.119                   | 0.01    |
| 5   | W11       |             | 0.459                   | 0.03    |
| 6   | 9e        |             | 6.094                   | 0.36    |
| 7   | W35       |             | 0.418                   | 0.02    |
| *** | Sorafenib |             | 0.034                   | 0.002   |

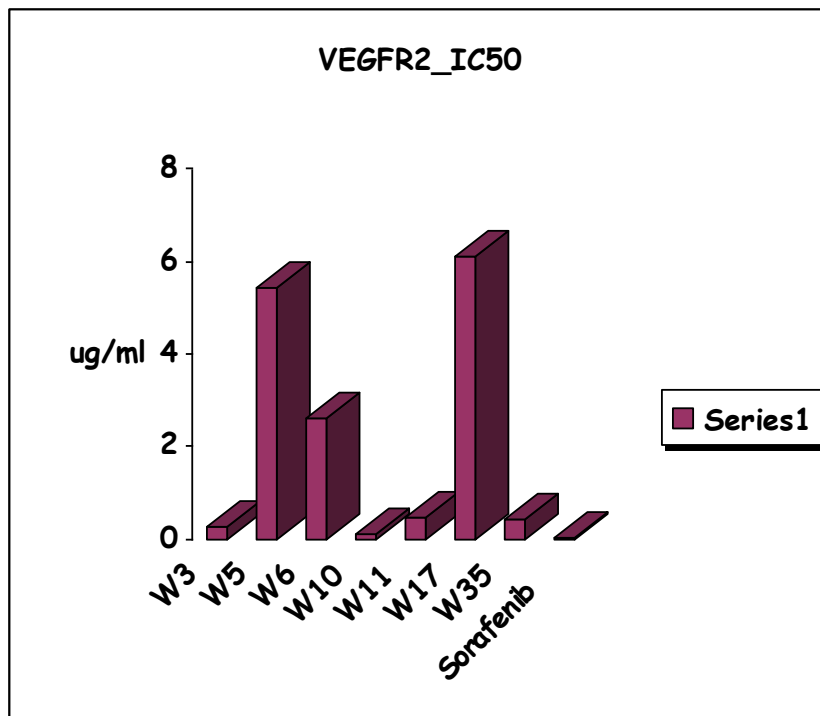

## Detailed results

VEGFR2

sample

| code                                                                                | IC50 | conc | log | %inh | T2 | T1 | ΔT | RFU2  | RFU1 | ΔRFU  | slope | K.Activity | EC  |
|-------------------------------------------------------------------------------------|------|------|-----|------|----|----|----|-------|------|-------|-------|------------|-----|
| W3                                                                                  |      | 10   | 2   | 89   | 30 | 0  | 30 | 11.05 | 0    | 11.05 | 3.333 | 13.2613    | 120 |
| 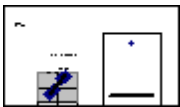   |      | 1    | 1   | 78   | 30 | 0  | 30 | 22.41 | 0    | 22.41 | 3.333 | 26.8947    | 120 |
|                                                                                     |      | 0.1  | -1  | 43   | 30 | 0  | 30 | 57.36 | 0    | 57.36 | 3.333 | 68.8389    | 120 |
|                                                                                     |      | 0.01 | -2  | 28   | 30 | 0  | 30 | 72.28 | 0    | 72.28 | 3.333 | 86.7447    | 120 |
|                                                                                     | EC   |      |     | 0    | 30 | 0  | 30 | 100   | 0    | 100   | 3.333 | 120        | 120 |
| code                                                                                | IC50 | conc | log | %inh | T2 | T1 | ΔT | RFU2  | RFU1 | ΔRFU  | slope | K.Activity | EC  |
| 5b                                                                                  |      | 10   | 2   | 70   | 30 | 0  | 30 | 29.55 | 0    | 29.55 | 3.333 | 35.4635    | 120 |
|    |      | 1    | 1   | 50   | 30 | 0  | 30 | 49.76 | 0    | 49.76 | 3.333 | 59.718     | 120 |
|                                                                                     |      | 0.1  | -1  | 25   | 30 | 0  | 30 | 75.02 | 0    | 75.02 | 3.333 | 90.033     | 120 |
|                                                                                     |      | 0.01 | -2  | 13   | 30 | 0  | 30 | 86.51 | 0    | 86.51 | 3.333 | 103.822    | 120 |
|                                                                                     | EC   |      |     | 0    | 30 | 0  | 30 | 100   | 0    | 100   | 3.333 | 120        | 120 |
| code                                                                                | IC50 | conc | log | %inh | T2 | T1 | ΔT | RFU2  | RFU1 | ΔRFU  | slope | K.Activity | EC  |
| 5i                                                                                  |      | 10   | 2   | 84   | 30 | 0  | 30 | 15.71 | 0    | 15.71 | 3.333 | 18.8539    | 120 |
|  |      | 1    | 1   | 58   | 30 | 0  | 30 | 42.31 | 0    | 42.31 | 3.333 | 50.7771    | 120 |
|                                                                                     |      | 0.1  | -1  | 19   | 30 | 0  | 30 | 81.38 | 0    | 81.38 | 3.333 | 97.6658    | 120 |
|                                                                                     |      | 0.01 | -2  | 7.5  | 30 | 0  | 30 | 92.51 | 0    | 92.51 | 3.333 | 111.023    | 120 |
|                                                                                     | EC   |      |     | 0    | 30 | 0  | 30 | 100   | 0    | 100   | 3.333 | 120        | 120 |
| code                                                                                | IC50 | conc | log | %inh | T2 | T1 | ΔT | RFU2  | RFU1 | ΔRFU  | slope | K.Activity | EC  |
| W10                                                                                 |      | 10   | 2   | 91   | 30 | 0  | 30 | 9.36  | 0    | 9.36  | 3.333 | 11.2331    | 120 |
|  |      | 1    | 1   | 76   | 30 | 0  | 30 | 24.39 | 0    | 24.39 | 3.333 | 29.2709    | 120 |
|                                                                                     |      | 0.1  | -1  | 55   | 30 | 0  | 30 | 45.12 | 0    | 45.12 | 3.333 | 54.1494    | 120 |
|                                                                                     |      | 0.01 | -2  | 31   | 30 | 0  | 30 | 69.24 | 0    | 69.24 | 3.333 | 83.0963    | 120 |
|                                                                                     | EC   |      |     | 0    | 30 | 0  | 30 | 100   | 0    | 100   | 3.333 | 120        | 120 |
| code                                                                                | IC50 | conc | log | %inh | T2 | T1 | ΔT | RFU2  | RFU1 | ΔRFU  | slope | K.Activity | EC  |
| W11                                                                                 |      | 10   | 2   | 87   | 30 | 0  | 30 | 13.06 | 0    | 13.06 | 3.333 | 15.6736    | 120 |
|  |      | 1    | 1   | 71   | 30 | 0  | 30 | 29.45 | 0    | 29.45 | 3.333 | 35.3435    | 120 |
|                                                                                     |      | 0.1  | -1  | 41   | 30 | 0  | 30 | 59.32 | 0    | 59.32 | 3.333 | 71.1911    | 120 |
|                                                                                     |      | 0.01 | -2  | 23   | 30 | 0  | 30 | 76.84 | 0    | 76.84 | 3.333 | 92.2172    | 120 |
|                                                                                     | EC   |      |     | 0    | 30 | 0  | 30 | 100   | 0    | 100   | 3.333 | 120        | 120 |
| code                                                                                | IC50 | conc | log | %inh | T2 | T1 | ΔT | RFU2  | RFU1 | ΔRFU  | slope | K.Activity | EC  |
| 9e                                                                                  |      | 10   | 2   | 72   | 30 | 0  | 30 | 28.23 | 0    | 28.23 | 3.333 | 33.8794    | 120 |
|  |      | 1    | 1   | 46   | 30 | 0  | 30 | 54.19 | 0    | 54.19 | 3.333 | 65.0345    | 120 |

|    |      |    |    |    |   |    |       |   |       |       |         |     |
|----|------|----|----|----|---|----|-------|---|-------|-------|---------|-----|
|    | 0.1  | -1 | 26 | 30 | 0 | 30 | 73.82 | 0 | 73.82 | 3.333 | 88.5929 | 120 |
|    | 0.01 | -2 | 14 | 30 | 0 | 30 | 86.47 | 0 | 86.47 | 3.333 | 103.774 | 120 |
| EC |      |    | 0  | 30 | 0 | 30 | 100   | 0 | 100   | 3.333 | 120     | 120 |

| code | IC50 | conc | log | %inh | T2 | T1 | ΔT | RFU2  | RFU1 | ΔRFU  | slope | K.Activity | EC  |
|------|------|------|-----|------|----|----|----|-------|------|-------|-------|------------|-----|
| W35  |      | 10   | 2   | 87   | 30 | 0  | 30 | 12.74 | 0    | 12.74 | 3.333 | 15.2895    | 120 |
|      |      | 1    | 1   | 68   | 30 | 0  | 30 | 31.52 | 0    | 31.52 | 3.333 | 37.8278    | 120 |
|      |      | 0.1  | -1  | 45   | 30 | 0  | 30 | 55.29 | 0    | 55.29 | 3.333 | 66.3546    | 120 |
|      |      | 0.01 | -2  | 23   | 30 | 0  | 30 | 77.29 | 0    | 77.29 | 3.333 | 92.7573    | 120 |
| EC   |      |      |     | 0    | 30 | 0  | 30 | 100   | 0    | 100   | 3.333 | 120        | 120 |

| code      | IC50 | conc | log | %inh | T2 | T1 | ΔT | RFU2  | RFU1 | ΔRFU  | slope | K.Activity | EC  |
|-----------|------|------|-----|------|----|----|----|-------|------|-------|-------|------------|-----|
| Sorafenib |      | 10   | 2   | 91   | 30 | 0  | 30 | 8.51  | 0    | 8.51  | 3.333 | 10.213     | 120 |
|           |      | 1    | 1   | 82   | 30 | 0  | 30 | 17.81 | 0    | 17.81 | 3.333 | 21.3741    | 120 |
|           |      | 0.1  | -1  | 63   | 30 | 0  | 30 | 36.84 | 0    | 36.84 | 3.333 | 44.2124    | 120 |
|           |      | 0.01 | -2  | 38   | 30 | 0  | 30 | 62.41 | 0    | 62.41 | 3.333 | 74.8995    | 120 |
| EC        |      |      |     | 0    | 30 | 0  | 30 | 100   | 0    | 100   | 3.333 | 120        | 120 |

|           |                        |
|-----------|------------------------|
| W3        | $y = 15.743x + 59.221$ |
| W5        | $y = 13.919x + 39.784$ |
| W6        | $y = 19.269x + 42.017$ |
| W10       | $y = 14.05x + 62.969$  |
| W11       | $y = 15.745x + 55.328$ |
| W17       | $y = 13.612x + 39.316$ |
| W35       | $y = 15.289x + 55.786$ |
| Sorafenib | $y = 12.684x + 68.604$ |

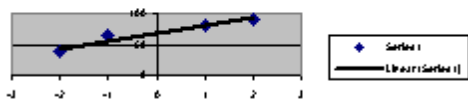

Supplement: s1 [file s1]
